# Supplementary material
Source: PubMed Central journal article supplement (PMC3782309)
Supplement: NIHMS497430-supplement-Supplemental.pdf [file NIHMS497430-supplement-Supplemental.pdf]

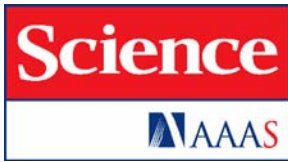

## Supplementary Materials for

### **Identity and Function of a Large Gene Network Underlying Mutagenic Repair of DNA Breaks**

Abu Amar M. Al Mamun, Mary-Jane Lombardo, Chandan Shee, Andreas M. Lisewski, Caleb Gonzalez, Dongxu Lin, Ralf B. Nehring, Claude Saint-Ruf, Janet L. Gibson, Ryan L. Frisch, Olivier Lichtarge, P. J. Hastings, Susan M. Rosenberg\*

\*To whom correspondence should be addressed. E-mail: [smr@bcm.edu](mailto:smr@bcm.edu)

Published 7 December 2012, *Science* **338**, 1344 (2012)  
DOI: 10.1126/science.1226683

#### **This PDF file includes**

Materials and Methods  
Supplementary Text  
Figs. S1 to S11  
Tables S1 to S13  
Full References

## Materials and Methods

### Strains and materials

Strains and plasmids used in this study are given in Table S4. Strains were constructed using standard techniques (29, 30). To construct strains for selection of I-*SceI*-induced nalidixic-acid resistance (Nal<sup>R</sup>) forward base-substitution mutations in the *gyrA* gene, we introduced I-*SceI*-cut site-*catFRT* or I-*SceI*-cut site-KanFRT 273 bp downstream of the *gyrA* gene (insertion/deletion site: 2334541-233503) by recombineering (30) using PCR products from plasmids pKD3 and pKD4, respectively, and primers: P531 = 5' GGC GTT GCA ATA TGC TGG CAG TGG GCC AGA AAA AAC GTT G **GTG TAG GCT GGA GCT GCT TC** 3' and P533 = 5' CTC AGA GAG TCG CTG TCG AGA AAG AGG TCC GGC TCA TTG A *ATT ACC CTG TTA TCC CTA CAT ATG AAT ATC CTC CTT AG* 3' (normal font, *gyrA* downstream homology; bold, pKD3/pKD4 homology; Italics, I-*SceI*-cut site). Sequencing was performed by SeqWright DNA technology services (Houston). M9 minimal medium (29) had carbon sources added at 0.1% and thiamine (vitamin B1) at 10 µg/ml. Minimal A medium (29); LBH medium (31). Antibiotic and other additives (Sigma) were used at the following final concentrations: ampicillin (100 µg/ml), chloramphenicol (25 µg/ml), kanamycin (50 µg/ml), tetracycline (10 µg/ml), rifampicin (100 µg/ml), 5-bromo-4-chloro-3-indolyl- β-D-galactoside (X-gal, 10 µg/ml), phenyl-β-D-galactoside (P-Gal, 500 µg/ml) and sodium citrate (20 mM). Exonuclease I, Taq DNA polymerase and dNTPs were from New England Biolabs, Inc.

### Qualitative colony-color papillation assay for stress-induced reversion of a *lac* frameshift allele

We developed a qualitative papillation assay for DSB-dependent stress-induced mutagenesis (SIM) (8), based on reversion of a conjugative-plasmid (F<sup>'</sup>)-borne *lacI-lacZ* +1 bp frameshift allele to Lac<sup>+</sup> during prolonged starvation (32), an assay in which nearly all of the mutagenesis under experimental starvation conditions is DSB-dependent SIM (3). This assay was conducted as previously (8) for the first 40,000 mutants screened (Fig. S1, screen 1), or modified as follows for improved efficiency of detection of SIM-down mutants, based on Lac-reversion screens of Miller (29), for the next 19,000 screened (Fig. S1, screen 2). Cultures were spotted into grids on papillation plates: minimal A medium containing 0.035% glycerol, 500 µg/ml of P-Gal (a non-inducing lactose analogue that serves as a carbon source for Lac<sup>+</sup> revertants) and 10 µg/ml of the β-galactosidase color indicator X-Gal. Plates were incubated at 37°C for 8-10 days. After exhausting the limiting glycerol carbon source, the colony is starved for carbon and stops growing. However, any Lac<sup>+</sup> revertant cells that arise within the Lac<sup>-</sup> colonies during the prolonged starvation use the P-Gal as a carbon source, and produce Lac<sup>+</sup> mutant microcolonies (papillae) within the larger growth-arrested Lac<sup>-</sup> colony. The Lac<sup>+</sup> papillae are stained blue by X-Gal (Fig. 1B), which is hydrolyzed to an insoluble blue dye by β-galactosidase (encoded by the *lacZ*<sup>+</sup> gene). The number of blue Lac<sup>+</sup> papillae

reflects DSB-dependent stress-induced Lac reversion-proficiency with “wild-type” (WT) showing abundant papillae and known DSB-dependent-SIM-defective mutants, such as *rpoS* (SMR6541), *recA* (SMR5535), *recB* (SMR593), *lexA*Ind<sup>-</sup> (SOS “off”) (SMR820), or *dinB* (SMR5830) showing fewer (Fig. 1B).

For the semi-quantitative version of the improved version of this assay (data in Table S1), cells were streaked on papillation medium and grown for 8-10 days at 37°C. Papillae were counted for at least for four colonies. Fold decrease is the number of papillae of the WT (control) divided by the number of papillae of the mutant assayed in parallel then averaged for 3 independent experiments.

### **Transposon-insertion mutagenesis and screen for SIM-deficient (SIM-down) mutants, secondary screens and mutation sequencing**

We isolated mutants defective in DSB-dependent SIM by screening libraries of random transposon-insertion mutants for reduced mutagenesis using two qualitative colony papillation assays [(8), and as improved above, **Qualitative colony-color papillation assay**].

Two successive libraries of mini-Tn10 (Tn10dCam) transposon-insertion mutants were constructed [per (9)], first, in Lac-reversion-assay strain FC40 or identical strain SMR4562, from which 40,000 mutants were screened (8) (Fig. S1, screen 1), then for the second screen of 19,000 mutants, in their F<sup>-</sup> parent strain FC36, a chromosomal *lac* deletion strain (Fig. S1, screen 2). Although DSB-dependent SIM is detected very sensitively in SMR4562, which carries the revertible *lacI-Z* +1bp frameshift allele in an F' plasmid, most transposon insertions target the F', and require secondary screening for chromosomal insertions (8). Therefore, the second library, from which a total of 19,000 insertions were screened, was made in FC36 (F<sup>-</sup>) to avoid insertions into the F' plasmid, and the F' was moved in afterward. After transfection with phage bearing the transposon, cells were plated onto minimal proline with 25 µg/ml chloramphenicol (Cam) plates to select Cam-resistant (Cam<sup>R</sup>) transposon-insertion mutants. Cam<sup>R</sup> colonies were screened for SIM-deficient phenotypes by gridding onto Lac-assay papillation plates (**Qualitative colony-color papillation assay**, above) seeded with the F' donor strain SMR6269, to transfer the F' with revertible *lacIZ* allele by conjugation. Neither auxotrophic parent, and so only conjugants, can grow on these plates, on which the ability to mutate during starvation is assayed and scored visually as described above (**Qualitative colony-color papillation assay**, Figs. 1B, S1AB).

Colonies with fewer papillae than the “WT” SMR4562 (Fig. 1B), are candidate SIM-deficient or “SIM-down” mutants. These were purified and further screened *via* a variety of secondary screens outlined in Fig. S1, including heritability of the papillation phenotype, linkage of the SIM-down phenotype with the transposon, determined by papillation assay after transduction of the Tn10dCam into a “clean” non-mutagenized strain, and quantitative SIM assays performed with either the original transposon-insertion allele after transduction into a new strain or with deletion alleles of non-essential genes after gene identification determined by sequencing. The SIM rates from these quantitative assays for all new SIM network genes/mutants identified are given in Table S3, summarized Table S1).

The genes mutated were identified by sequencing as follows. The Tn10dCam insertion site was amplified by a two-stage single-primer PCR, followed by sequence analysis by SeqWright (Houston). First, to 20  $\mu$ l of the reaction volume, we added 100 ng of genomic DNA as template, 10 pmol of primer P1 (5' GCCGCTGGCGATTTCAGGTTC 3'; specific to the *cat* gene in the mini-Tn10dCam), and the DNA was subjected to linear amplification in PCR buffer (10 mM Tris-HCl pH 8.3, 50 mM KCl, 1.5 mM MgCl<sub>2</sub>, 0.2 mM each of dATP, dTTP, dCTP and dGTP, and 2.5 units of Taq DNA polymerase) as follows. Cycle 1: 94° for 4 min; cycles 2-20: 94° for 30 sec; 55° for 30 sec; 72° for 2 min. This product was then used in the second stage of PCR with the same primer P1 and annealing performed at low annealing temperature. At low annealing temperature the primer not only anneals at the end of the transposon sequence, but will occasionally also bind nonspecifically to sequences downstream of the transposon setting the stage for further amplification geometrically. To 50  $\mu$ l reaction volume, we added 5  $\mu$ l of the stage 1 product, 20 pmol of primer P1, and the DNA was subjected to amplification in PCR buffer as follows. Cycle 1: 94° for 2 min; cycles 2-10: 94° for 5 sec; 35° for 5 sec; 72° for 2 min; cycles 11-35: 94° for 5 sec; 55° for 5 sec; 72° for 2 min; cycle 36: 72° for 5 min. This PCR product was then digested with 1 unit of exonuclease I (37° for 1h) to remove any excess ssDNA present in the PCR products, purified with PCR purification Kit (Qiagen), and used as template for sequencing with primer P2 (5' TACAACAGTACTGCGATGAG 3'), which binds downstream of primer P1 in the transposon sequence. To validate this experimental approach for determining sequence into which transposons were inserted in the SIM-down mutants, the site of insertion of a previously defined *rpoE* promoter mutant (8) was determined. After sequencing 200 mutants from screen 2 (Fig. S1C), we found that they represented 93 genes (many were “hit” in two or more independent mutants). An additional 3 genes not found in screen 2 were identified in screen 1, along with 10 genes found also in screen 2.

We verified the mutants identified using *bona fide* null alleles of each of the non-essential genes identified using the Keio deletion collection (33), and the quantitative stress-induced Lac reversion assay (34) as described below. For polycistronic genes that were not last in the operon, the Kan gene that disrupts each Keio deletion allele was excised at its flanking *FRT* sites to make nonpolar deletion alleles, per (33). For essential genes, the quantitative assays and subsequent studies were done with the non-null transposon-insertion alleles that we had isolated after transduction into “clean” non-mutagenized cells. Results of the quantitative Lac assay are given in Table S3, summarized Table S1.

### **Quantitative SIM assays with and without enhancement by I-SceI-induced double-strand-breaks**

Standard (no I-SceI) assays were performed per (34). For a more sensitive assay with higher SIM rates, and thus greater range for measuring the magnitude of SIM defects of SIM-down mutants, and double mutants in epistasis (double-mutant) analyses, we used I-SceI-endonuclease induced cleavage near *lac*, which increases DSB-dependent SIM dramatically over rates without local I-SceI cleavage (1). Bacterial strains carrying the inducible double-strand-break (DSB) system consisting of a chromosomally encoded I-

*SceI* endonuclease gene controlled by the glucose-repressible  $P_{BAD}$  promoter and an F' cut-site near *lac* (*I*) were maintained on glucose medium to repress I-*SceI* synthesis and experiments performed per (*I*, 35).  $Lac^+$  colonies originate either by a -1-bp frameshift “point” mutation (36, 37) or by amplification of the leaky *lac* allele to multiple copies (38, 39). Because amplification accounts for 5% or fewer of the  $Lac^+$  colonies arising on day 5 or earlier (38), data were not corrected to exclude amplification. Relative viability was determined per (34) and wherever necessary the mutation rates were normalized for relative viability per (*I*).

### **Reconstruction experiments: demonstration that electron-transfer mutants are mutagenesis-, not growth-defective**

We used reconstruction experiments to determine whether the electron transfer mutants were defective in mutagenesis, or only in their speed of formation of  $Lac^+$  colonies under selection conditions [reviewed, (40)]. Slow colony growth could give the appearance of fewer stress-induced mutants, when actually the mutants formed but failed to produce colonies rapidly enough to be scored (40). We constructed strains carrying mutations for major electron-transfer genes and the  $Lac^+$  allele and determined their speed of colony formation on lactose medium in the presence of neighbor cells, under exact reconstructions of quantitative Lac assay conditions (results shown in Table S13). The electron-transfer mutant alleles were transduced into three  $Lac^+$  day-5 stress-induced mutants (SMR3856, SMR3858 and SMR3859) that had been characterized with respect to colony forming ability on lactose medium (41). Days required for colony formation under conditions identical to those of quantitative SIM experiments, including the addition of the same number of *lac*-deleted scavenger cells, are shown (Table S13).

### **DSB-dependent chromosomal stress-induced Tet frameshift-mutation assays**

#### Description

The Tet mutation assay (2) measures reversion of a chromosomal *tet* +1-bp frameshift allele, placed 8.5 kb from an I-*SceI* double-strand endonuclease cutsite (I-site A, *tet2*) engineered into plasmid-free cells with a chromosomal, regulatable I-*SceI* gene (2). The cells are starved in liquid with no tetracycline (no selection for Tet function) then rescued from starvation and plated for tetracycline-resistant ( $Tet^R$ ) mutant and total cfu and mutant frequencies quantified (2). The mutation pathway requires starvation stress, which induces the  $\sigma^S$  response, *or* artificial upregulation of the  $\sigma^S$  stress response in unstarved cells (2), and so is stress-induced mutagenesis. Mutagenesis also requires the SOS response, DinB/Pol IV error-prone DNA polymerase, and homologous recombinational DSB-repair enzymes including RecB which is specific for DSBs, and requires DSBs made either by I-*SceI*, or spontaneously (2). These DNA breaks are repaired by homologous recombination (HR) with either an uncleaved sister chromosome [sisters are present in ~40% of starving *E. coli* (42)] or an uncleaved spontaneous tandem DNA duplication [duplications present in about  $10^{-3}$  of cells, reviewed, (7)]. The protein requirements for  $\sigma^S$  and SOS responses, DSB repair proteins and DinB define this as a similar or the same DSB-dependent stress-induced mutagenesis mechanism operative in the Lac assay starvation conditions (2).

### Rationale:

This assay addresses two concerns about mutagenesis studied in the Lac assay: that it might have been F'-plasmid dependent; and that it might have required selection for the gene undergoing mutagenesis and thus possible selection of growth of cells with multiple copies of that gene that then mutate at rates difficult to determine (per gene copy or base pair). This assay employs plasmid-free cells and the mutations accumulate dependently on time in starvation under no selection for *tet* gene function.

### Procedure

Briefly, per (2), cells were streaked on M9 glucose vitamin B1 (B1) medium supplemented with proline (20 µg/ml) and incubated for ~22 hours at 37°C. Single colonies were inoculated into 5 ml of M9 glucose B1 proline broth and grown for 12 hours with shaking (200-250 rpm). These were diluted 1:100 into the same medium and grown 8-10 hours, diluted further by 1:100 and grown for 84 hours with shaking (200-250 rpm). Three-independent cultures per strain were used for each experiment. Mutant frequencies are the titers of cfu on LBH glucose tetracycline (Tet<sup>R</sup> mutant cfu) divided by those from LBH glucose plates (total cfu), and mean ± SEM for ≥3 independent experiments are displayed (Fig 2, Table S5).

### **DSB-dependent chromosomal stress-induced Nal base-substitution forward-mutation assays**

The Nal mutation assay measures chromosomal forward mutations in the *gyrA* gene that confer resistance to the topoisomerase inhibitor nalidixic acid [*e.g.*, (2)]. These are base-substitution mutations, predominantly C/G to T/A and A/T to G/C transitions with some G/C to T/A and A/T to C/G transversions also observed (2, 43). Assays were performed as for the Tet assay, but in cells with their I-*SceI* site 273 bp downstream of *gyrA*, and with the final selection step on nalidixic acid-containing medium. Cells were starved in liquid with no nalidixic acid then rescued from starvation and plated for nalidixic acid-resistant (Nal<sup>R</sup>) mutant and total cfu and mutant frequencies quantified (2). 24h-grown colonies from M9 glucose B1 proline plates were inoculated into 5 ml of M9 glucose B1 proline broth, grown for 12 hours with shaking (200-250 rpm), diluted 1:100 into the same medium and grown 8-10 hours, diluted further by 1:100 and grown for 84 hours with shaking (200-250 rpm). Three-independent cultures per strain were used for each experiment. The 84h grown cultures were plated on LBH glucose 30 µg/ml nalidixic acid solid medium to score Nal<sup>R</sup> mutant colonies, and LBH glucose for total cfu. Mutant frequencies were determined by dividing titers of Nal<sup>R</sup> cfu by the total cfu, and mean ± SEM for ≥3 independent experiments are displayed (Fig 2, Table S5).

### **Identification of network mutants deficient in activating the RpoS ( $\sigma^S$ ) stress response: catalase and fluorescence assays**

#### Catalase assay:

We first screened SIM-down mutants for those that fail to activate the  $\sigma^S$  response, using a simple colony assay for catalase activity in stationary phase (Table S7).  $\sigma^S$

transcriptionally upregulates *katE*, encoding catalase, in stationary phase (44). Catalase metabolizes hydrogen peroxide (H<sub>2</sub>O<sub>2</sub>) (45) such that cells defective for  $\sigma^S$  activity are catalase defective (44). Colonies of the mutants were grown on M9 glycerol medium for 3 days at 37°C. 5  $\mu$ l of H<sub>2</sub>O<sub>2</sub> was dropped onto each colony, and the time elapsed before bubbles appeared was measured. SMR4562 (WT) and *rpoS* mutant (SMR6541) strains used as controls take 0 and 10-15 sec. to form bubbles, respectively. Mutants with >2 sec. delay in bubbling were scored as catalase ( $\sigma^S$ -activity) defective (Table S7).

#### Flow cytometric $\sigma^S$ -dependent transcription assay:

We next quantified transcription from the  $\sigma^S$ -dependent *yiaG* promoter by flow cytometry of strains with a chromosomal *yiaG-yfp* fusion in our mutation-assay strain into which we moved each catalase-negative SIM-down mutation. Strains were cultured for 48h with aeration at 37°C in M9 B1 glycerol. A “yellow” gate was set as the window below which control *rpoS* mutant cells fall (vertical line in *rpoS* plot in Fig. S4A). Cells falling below the gate are inferred to be  $\sigma^S$ -activity deficient.  $\geq 10^5$  cells per culture and  $\geq 3$  cultures per strain were analyzed per experiment. All catalase-deficient mutants were confirmed in this assay as  $\sigma^S$ -response deficient (Figs. 4A, S4A,B).

#### Generic transcription assay:

For all mutants that were  $\sigma^S$ -response deficient, to control for possible mutations that might decrease transcription generally, not specifically to the  $\sigma^S$  response, we measured transcription from the  $\sigma^S$ -independent IPTG-inducible P<sub>lac</sub> promoter using a chromosomal P<sub>lac</sub>*cfp* fusion gene and fluorescence (Figs. 4B,S4C). Cells were grown for 48h with aeration at 37°C in M9 B1 glycerol with or without 1 mM IPTG. 0.1 ml of 48h culture was used to determine the fluorescence intensity at 480 nm, and OD for cells was taken at 600 nm using a 386 well microplate (Greiner Bio One) and Multi-mode Microplate Reader (Model-Infinite M200 Pro, Tecan). None of the  $\sigma^S$ -response-deficient mutations caused reduced transcription of P<sub>lac</sub>*cfp* (Figs. 4B, S4C), and thus all were confirmed as conferring specifically  $\sigma^S$ -response deficiency.

#### Growth rate control:

We established growth curves for all  $\sigma^S$ -response-deficient mutants to rule out the possibility that their failure to elicit the response could be caused by delayed entry into stationary phase, when the  $\sigma^S$ -response is induced. Overnight cultures in LB medium were diluted 1/100 with M9 medium (with 10  $\mu$ g/ml thiamine and 0.1% glycerol) and 0.1 ml used in a 386 well microplate. The OD<sub>600</sub> was read by a Multi-mode Microplate Reader (Model-Synergy 2, BioTek) at 30-min intervals for 48-h. Data presented (Figs. 4C,S5) are the means of  $\geq 3$  experiments of 3 cultures per strain.

### **Identification of network genes that function in activation of the SOS DNA-damage response: UV-sensitivity and flow-cytometric assays**

We screened SIM-down mutants for those that fail to activate the SOS-response first by sensitivity to UV light. Mutants were grown overnight in liquid LB, diluted 1/10 with LB and then streaked on LB solid medium and exposed to UV at 50 and 60 joules/m<sup>2</sup>.

*recB* (SMR593) and *recG* (SMR1982) mutant strains were used for strongly and weakly UV-sensitive controls, respectively. Mutants with the same or greater sensitivity as *recB* were scored as “strongly” UV-sensitive, and those more sensitive than *recG* but less than *recB*, and less than or equal to *recG* but more than WT, as “moderately” and “weakly” UV-sensitive, respectively.

Twenty-six of the SIM network mutant genes confer sensitivity to UV irradiation (Tables S1, S7). To determine which are defective in activating the SOS DNA-damage response, required for SIM, we determined the percentage of cells spontaneously SOS induced *via* GFP expression from the chromosomal SOS-dependent  $P_{sulA}gfp\text{-}mut2$  construct per (21), shown in Fig. 4K. Whereas normally just under 1% of cells are SOS induced due to spontaneous DNA damage (21), these mutants are deficient in activation of SOS and have fewer SOS-induced green cells. The SMR15962 (*pgi*), SMR15980 (*uvrY*), SMR16024 (*recB*), SMR17043 (*recC*), SMR6039 (WT; positive control) and SMR6178 [(*lexA3* (Ind<sup>-</sup>); negative control] strains (Table S4) were used in Fig. 4K.

### **Identification of network genes that function in activation of the $\sigma^E$ response: SDS-EDTA-sensitivity and $\beta$ -galactosidase assays**

To identify mutants defective in activating the RpoE ( $\sigma^E$ ) membrane-protein stress response, SIM-down mutants were tested for SDS-EDTA sensitivity (Fig. S9A and Tables S1, S7) (11).  $10^2$ - $10^3$  cells from LBH saturated cultures were spotted onto M9 B1 glycerol plates with and without 0.01% SDS and 0.25 mM EDTA, grown for 48h at 30°C, and compared with WT SMR4562 and SMR5236 cells carrying the stress-response defective (but essential-function-proficient) *rpoE2072::Tn10dCam* allele (8).

Mutant alleles from SDS-EDTA-sensitive mutants (Fig. S9A and Table S1, S7) were transduced into strain CAG45114, containing the  $\sigma^E$ -dependent *rpoHP3-lacZ* reporter (20) and tested for *lacZ* expression from this  $\sigma^E$ -response-dependent promoter per Table S11.  $\beta$ -galactosidase assays were performed as described (29, 46) except that saturated LBH cultures were used, rather than log-phase. We reasoned that the starvation induction of the  $\sigma^E$  response is more likely under our stationary-phase-stress experimental conditions, and so to reflect that, we measured  $\sigma^E$  activity in saturated stationary-phase cultures measured as expression of the  $\sigma^E$ -response-dependent *rpoHP3-lacZ* fusion gene (20) in cultures grown to saturation.

### **Statistical methods**

Except where indicated otherwise, statistical analyses were performed using the Statplus software package. *P* values were determined by two-tailed Student's *t* test for strains compared in parallel in the same experiments.



## Supplementary Text

### Text S1. Identification of *crp* by candidate-gene approach

We identified *crp* as a gene in the stress-induced mutagenesis network by candidate-gene approach based on our having found its partners *barA* and *uvrY* (47) in our screen. Based on their identities, we constructed a *crp* null-mutant derivative of the Lac-assay strain (Table S4) and demonstrated its moderate 3.1-fold SIM defect (Table S3).

### Text S2. Calculation of saturation of the screens

We found that out of 93 genes identified in screen 2, 80 mutant genes (10 of which overlapped with genes identified in screen 1, Fig. S1C) could be confirmed by quantitative SIM assay (Fig. S1C, Table S3). Screen 1 produced an additional 3 genes not found in screen 2. With identification of 80 genes from 187 mutants (from the second screen) + 3 additional new mutants obtained from the first screen, the screen is 94% saturated, calculated using Poisson distribution as follows.

#### Calculating saturation from screen 2:

Number of mutants isolated for SIM = 187

Number of genes identified = 80

Mean hits per gene ( $m$ ) = number of mutants isolated for SIM/number of genes identified  
 $= 187/80 = 2.3375$

Poisson distribution  $P_0 = e^{-m} = e^{-2.3375} = 0.0966$ , *i.e.*, 90.34% saturation achieved in screen 2.

Total number of genes to be found:  $80/0.9034 = 88.55$ .

Including screen 1 with screen 2, we found 83 of  $88.55 = 93.8\%$  saturation.

***Estimations of SIM network genes not yet discovered.*** Note that although we have identified more than the predicted 89 genes in the SIM network (we have a total network of 93 genes, Fig. 1, Table S2) some of the genes identified previously by candidate gene approaches could not have been obtained in this screen for reasons outlined in Table S2. Therefore, our data and calculation imply that there are still SIM genes that remain to be discovered. The number remaining can be roughly projected in two ways.

First, the number of genes remaining that this screen could in principle detect can be estimated to be about 5, as follows. The number remaining could be 6 genes predicted (we found 83 of a predicted 89) – 1 gene from candidate gene approaches that could in principle have been found in our screen but was not: *recF* (see Table S2) = a predicted 5 genes that remain to be discovered.

An alternative projection leads to a possible ~20 genes not yet discovered, as follows. The fact that some known genes cannot be obtained in this screen (see Table S2) suggests that there could be other network genes that might not be detected for similar reasons. Of those undetectable, seven can be excluded from consideration: LexA, is not positively required for mutation—it represses the SOS regulon, so it should not be counted (Table S2 legend); Pils II and V play minor roles (see Table S2); the *ruvABC* genes produce an unusual phenotype (Table S2 legend) that we did screen for, so others

of this type are likely to have been detected; and DinB/PolIV though important is present in two copies (mero-diploid) in the strain, and so could not be obtained (Fig S1, legend). Because a very small fraction of the genome is mero-diploid, we can exclude *dinB* as non-representative. That leaves 2 of the 9 genes not obtained in the screen that could be representative of other important SIM genes that the screen might not detect (*nusA*, an essential gene for which only a temperature-sensitive mutant is known to be viable, and *recF*). Conceivably, if the screens missed 2 representative targets and found 7 (or 78%) among previously known genes, then the 83 found by the screens represent 78% of the total network. That leaves 23 genes (minus *crp*, which we added here by candidate gene approach, *nusA*, and *recF*) = a possible 20 network genes not yet identified. This number is based on very small numbers (2 or so and 7) and so could vary considerably in either direction.

### **Text S3. Estimated number of essential gene mutants not found in the screen**

The essential genes that we identified in the SIM-down mutant screen are *cysD* (essential for growth in M9 medium), *hemL* (33), *groES* (48), *ligA* (49), *rpoE* (11), *ubiA* (33), *ubiD* (33) and *yigP* (33). We estimate that an additional two are likely to have been missed as follows.

Number of hits for essential gene mutants for SIM = 12

Number of essential genes identified = 8

Mean hits per gene ( $m$ ) = number of essential gene mutants for SIM/number of essential genes identified

$$= 12/8 = 1.5$$

Poisson distribution  $P_0 = e^{-m} = e^{-1.5} = 0.223$ , *i.e.*, 78% saturation achieved

Total number of essential genes to be found:  $8/0.78 = 10$

Essential genes remaining to be found = number of essential genes to be found - number of essential genes found

$$= 10 - 8 = 2$$

### **Text S4. Model for role of the electron transfer chain in activation of the $\sigma^S$ response during starvation and stress-induced mutagenesis**

In Fig. 4L, we suggest that during starvation some amount of the ETC product, ATP, is required for mutagenesis. Our data suggest that only specific energy sources malate and succinate are used to generate that ATP, during either an internal autophagy-like recycling process or external cannibalism at the brink of starvation. The ETC acts partly upstream of ArcBA/RssB (suppressor analyses), which control  $\sigma^S$  protein levels (19), and partly downstream (epistasis analyses) possibly by activating  $\sigma^S$ -controlled genes or other components of mutagenesis (Fig. 4L). The data show a previously unknown specific  $\sigma^S$  activation route during starvation, from consumption of malate and succinate, through a particular ETC branch to  $\sigma^S$ -response activation and mutagenesis (Fig. 4L). Activation of the  $\sigma^S$  response is a critical hub in the network, supported by a large allocation of

network genes (Fig. 3A, green) demonstrating its importance to mutagenesis. Generalization of the roles of the  $\sigma^S$  response (7) and supporting network proteins in the chromosomal Tet and Nal assays (Fig. 2, table S5) indicates that this large network segment and hub is generally important to *E. coli* mutagenesis.

Legend to Figure 4L Model: ETC-mediated stress-sensing from starvation to mutation.

Genes identified in screens, red; black and blue lines, biochemical transformations; gray lines, regulation. During nutrient availability reduced ubiquinones (UQH<sub>2</sub>) allow autophosphorylation of ArcB sensor-kinase (19), which phosphorylates ArcA, which then transcriptionally represses *rpoS* (encoding  $\sigma^S$ ) and its positive regulator (19) reducing  $\sigma^S$  and turning mutation “Off”. Upon starvation, oxidized UQ prevents ArcB autophosphorylation, ending ArcA repression (19), thus allowing  $\sigma^S$  accumulation; so mutation turns “On”. UQ inhibition of repression of  $\sigma^S$  is, we suggest, the component of ETC function suppressed by  $\Delta arcB$  and  $\Delta arcA$  (**D-F**). The component not suppressed could be reduction in levels of ATP (blue arrow). HemL, biosynthesis of hemes [prosthetic groups of SdhBD and CyoAD (14)]. HscB, biogenesis of Fe-S cluster, a cofactor. e<sup>-</sup>, electron;  $\textcircled{P}$ , phosphate.

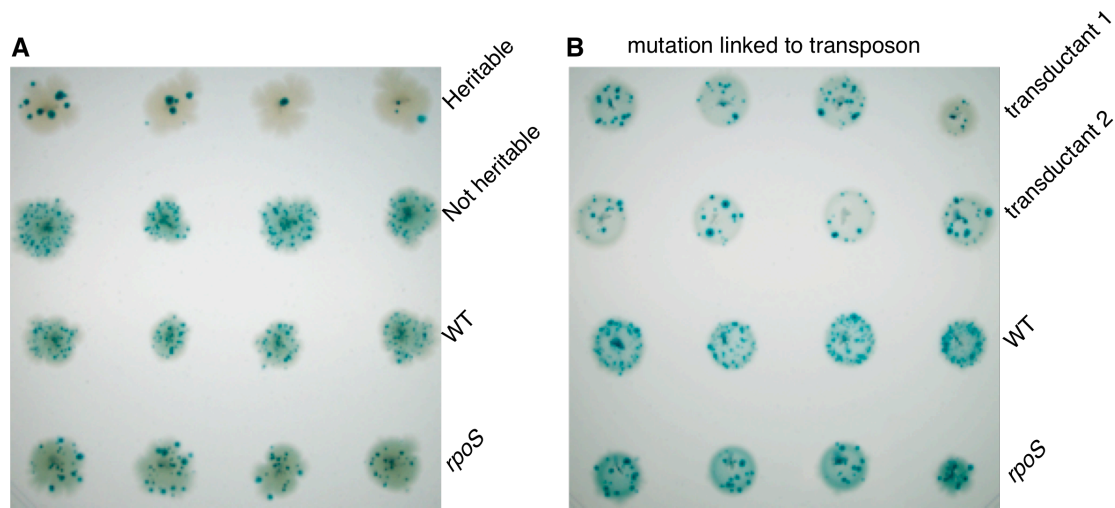

**C**

| Screen                                                                                                                                                 | Screen 1                                  | Screen 2                                       |
|--------------------------------------------------------------------------------------------------------------------------------------------------------|-------------------------------------------|------------------------------------------------|
| <b>Primary screen:</b>                                                                                                                                 |                                           |                                                |
| Number of Tn/0dCam insertion mutants screened in colony-papillation screen                                                                             | 40,000                                    | 19,000                                         |
| Number of candidate SIM-down mutants identified                                                                                                        | 427                                       | 1043                                           |
| <b>Secondary screens:</b>                                                                                                                              |                                           |                                                |
| Number that show SIM-down papillation phenotype repeatably / heritably                                                                                 | 130                                       | 256                                            |
| Number of chromosomal insertion mutations that show SIM-down papillation phenotype after transducing the Tn insertion into a new strain and re-testing | 27                                        | 200<br>(187 that pass quantitative test below) |
| Number of genes shown by sequencing to have been mutated (many were identified in multiple independent isolates)                                       | 13                                        | 93                                             |
| Number of genes verified in quantitative Lac mutagenesis assays (results Table S3)                                                                     | 13 (3 unique + 10 also found in screen 2) | 80                                             |
| Total genes indentified                                                                                                                                | 83                                        |                                                |
| Number not known from previous work                                                                                                                    | 76                                        |                                                |

**Fig. S1. Representative example of SIM-down mutant in papillation secondary screens and summary of results from screens**

(A) Example of results from secondary screen for repeatability (heritability) of mutation-defective phenotype of mutants identified in the primary screen. Colonies with few Lac<sup>+</sup> mutant blue papillae in the primary screen 2 were streak-purified and re-tested, in four spots each, for a heritable reduced-papillation phenotype with positive, *rpoS* or *recA* mutant, and negative, WT, control strains in parallel. (B) Test for mutations linked with the transposon. Heritable mutations were moved by phage P1-mediated transduction to a clean, non-mutagenized Lac-assay strain and two independent transductants of each were retested alongside positive, *rpoS*, and negative, WT, control strains. Shown are two transductants of a single mutation that tested positive in screen 2. (C) Summary of results of screens 1 (8) and 2 and the secondary screens that identified *bona fide* SIM network genes. In screen 2, of 1043 candidates identified in the primary screen, 256

passed the heritability test (per A), and 200 passed the transduction test (per B) and were winnowed down to 187, representing 80 genes, by the quantitative test after sequencing.

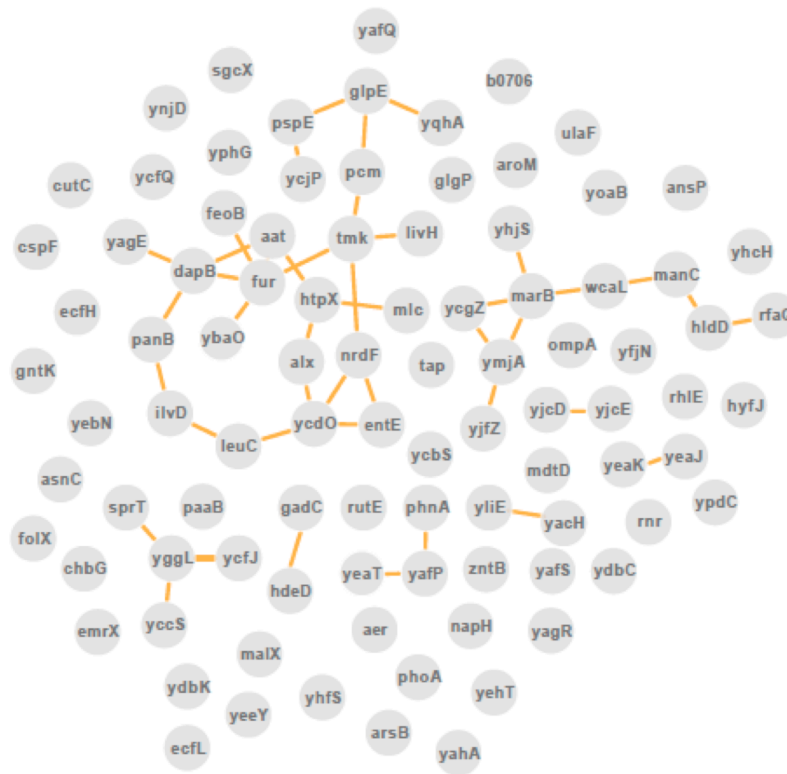

**Fig. S2. A group of 93 randomly chosen genes from *E. coli* do not form a network of protein-protein interactions.**

This control group was chosen by random selection from a total of 4233 protein-encoding genes in *E. coli*. All network links between those control genes were taken from STRING (Search Tool for Interacting Genes) 9.0 (12). The network layout was then computed, similarly to the SIM network shown in Fig. 3A, with Cytoscape 2.8.3 software using the "unweighted force-directed layout" algorithm.

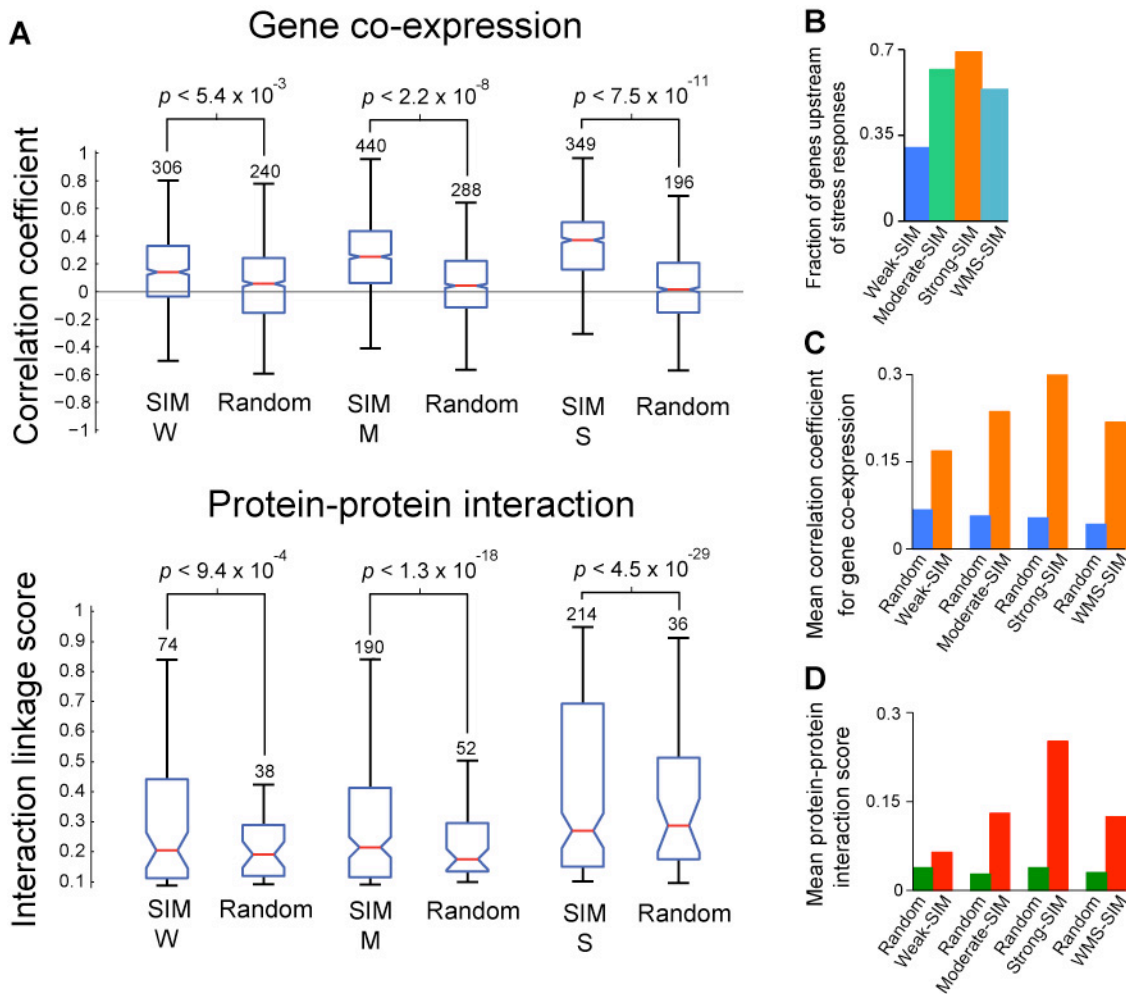

**Fig. S3. Protein-protein interaction and gene co-expression analyses for network genes of strong, moderate and weak SIM defects and stress-response activators in each class**

(A) The statistical significance for both gene co-expression and protein-protein interaction are in the following order: strong (S) > moderate (M) > weak (W) SIM defects defined as >9-fold, 3.1-9-fold, and 1.5-3-fold, respectively (Table S3). For gene co-expression (top panel), the number of pairs with positive co-expression Pearson correlation coefficients, for the groups weak, moderate and strong, were 306 pairs out of 435  $[(30 \times 29)/2]$ , 440 pairs out of 561  $[(34 \times 33)/2]$  and 349 pairs out of 406  $[(29 \times 28)/2]$ . For protein-protein interaction (bottom panel), the number of pairs with positive interaction scores for the groups weak, moderate and strong were 74 pairs out of 435  $[(30 \times 29)/2]$ , 190 pairs out of 561  $[(34 \times 33)/2]$  and 214 pairs out of 406  $[(29 \times 28)/2]$  that have positive protein-protein interaction linkage scores. Co-expression correlation coefficients were determined from 907 genome-wide microarray experiments over 4297 genes deposited in the Many Microbe Microarrays Database (13), and protein-protein interaction linkage scores were taken from STRING 9.0 database (12) resulting in 439486 interaction pairs. Random controls were produced by selecting a random group of equal size among all *E. coli* genes. *P* values were calculated with a sign-test giving the probability of the null-hypothesis “number of tested positive pairs equals the random

*control number of positive pairs*". **(B)** Genes upstream of the  $\sigma^S$ ,  $\sigma^E$  and SOS stress responses are a greater fraction of strong than moderate, and moderate than weak SIM genes. The number of mutants with functions upstream of the three stress responses for the weak, moderate and strong groups are 9, 21 and 20, respectively (Tables S1, S3). The fraction of the upstream mutants in each group was determined by dividing the number of mutants upstream of stress responses for each groups with total number SIM mutants for the respective groups, and plotted. WMS, all SIM genes for weak, moderate and strong groups. **(C and D)** Both co-expression and protein-protein interaction increase with increasing strength of the effect of the mutations in SIM. The mean co-expression coefficient **(C)** and mean interaction linkage score **(D)** for the weak (30 genes), moderate (34 genes) and strong (29 genes) groups are plotted. For each of the groups, the values for random pairs were used as controls.



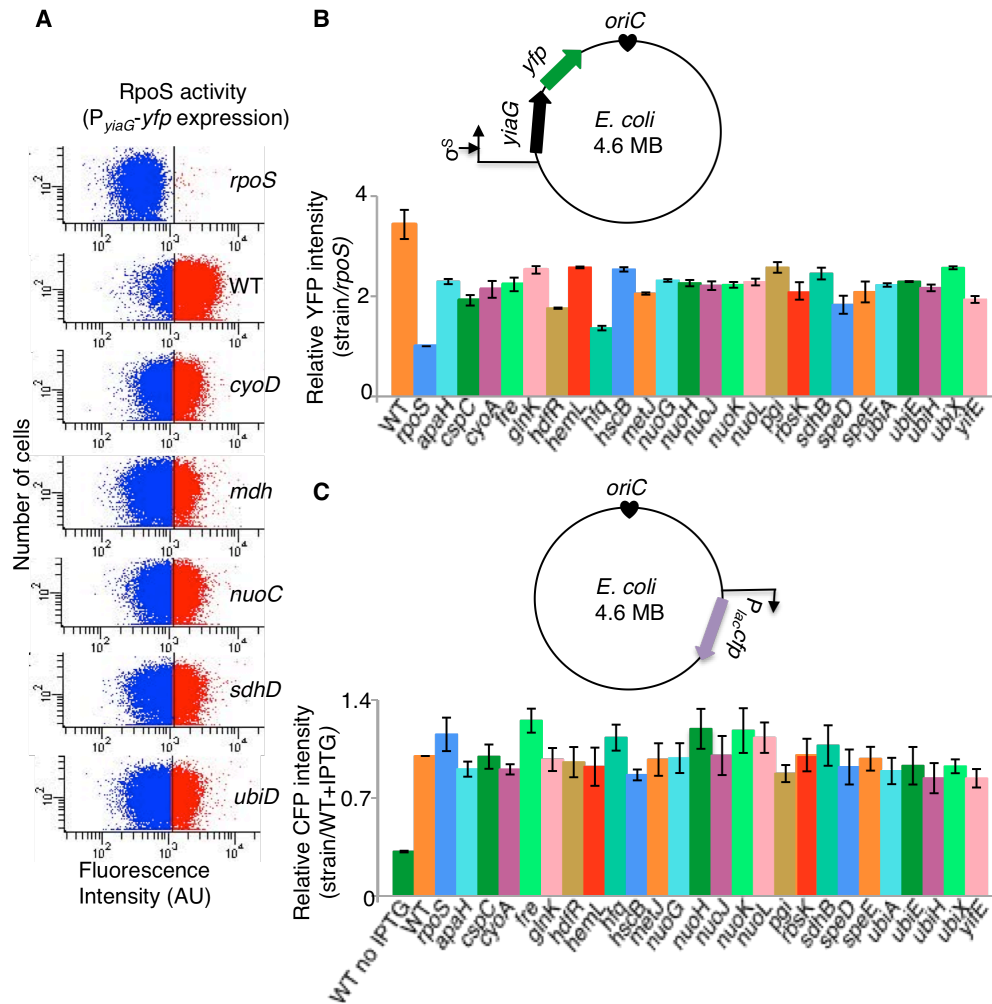

**Fig. S4. SIM network genes that function in activation of the  $\sigma^S$  stress response**

Thirty-one SIM-down mutations (here and Fig. 4A) were identified as catalase- ( $\sigma^S$ -activity-) defective and show reduced transcription from the  $\sigma^S$ -dependent  $P_{yiaG}$  promoter but not the  $\sigma^S$ -independent  $P_{lac}$  promoter (Methods, assays for  $\sigma^S$ -response-deficiency). **(A)** Reduced transcription from *yiaG-yfp*, representative example of flow cytometric data. Representative dot plots of fluorescence of five electron-transfer SIM-down mutants showing reduced  $\sigma^S$  activity at *yiaG-yfp* compared with the wild-type control. Data points indicate flow-cytometry events (cells) and are colored red to the yellow side of the yellow gate and blue on the non-yellow side of the yellow gate (gate set to define *rpoS* null mutant cells as “non-yellow”, Methods). Strains *cyoD* (SMR13035), *mdh* (SMR13058), *nuoC* (SMR12655), *sdhD* (SMR13033) and *ubiD* (SMR13098), WT (SMR10582) and *rpoS* (SMR12661). **(B)** Quantification from multiple experiments of reduced  $\sigma^S$ -dependent transcription in catalase-defective SIM-down mutants. Data are the means  $\pm$  SEM ( $\geq 3$  experiments each) of the ratio of the mean-fluorescence intensity of each mutant divided by the mean-fluorescence intensity of  $\Delta rpoS$  control cells assayed in parallel. Strains are those in (A) and *apaH* (SMR12830), *cspC* (SMR14263), *cyoA* (SMR14283), *fre* (SMR14267), *glnK* (SMR14281), *hdfR* (SMR14261), *hemL* (SMR14431), *hfg* (SMR14295), *hscB* (SMR14275), *metJ* (SMR14269), *nuoG*

(SMR14420), *nuoH* (SMR14287), *nuoJ* (SMR14289), *nuoK* (SMR14285), *nuoL* (SMR14273), *pgi* (SMR13295), *rbsK* (SMR13312), *sdhB* (SMR14297), *speD* (SMR12828), *speE* (SMR13310), *ubiA* (SMR14447), *ubiE* (SMR12657), *ubiH* (SMR12686), *ubiX* (SMR12699) and *yifE* (SMR14259). All are significantly lower than WT (*P* values, and all numerical data and *P* values, Table S8). (C) The  $\sigma^S$ -activity-deficient mutants are not generally transcription-deficient as seen by their robust transcription of the  $\sigma^S$ -independent, IPTG-inducible *lac* promoter. Cultures were grown with and without IPTG and fluorescence determined by plate reader. Values are for the IPTG-induced transcription (both IPTG-induced and uninduced shown for WT). As for the WT, CFP expression was also 2.2-4.8-fold induced in the presence of IPTG compared with no IPTG for the mutants. Fluorescence intensity for cells grown in the presence of IPTG was normalized to their OD<sub>600</sub> and this value normalized to that of WT + IPTG fluorescence/WT OD<sub>600</sub> and plotted. Mean  $\pm$  SEM for 3 experiments of 3 cultures per strain. The strains used for CFP expression analysis in Fig. 4B and in panel C of this Fig. are listed in Table S4 (SMR14471 to SMR15109).

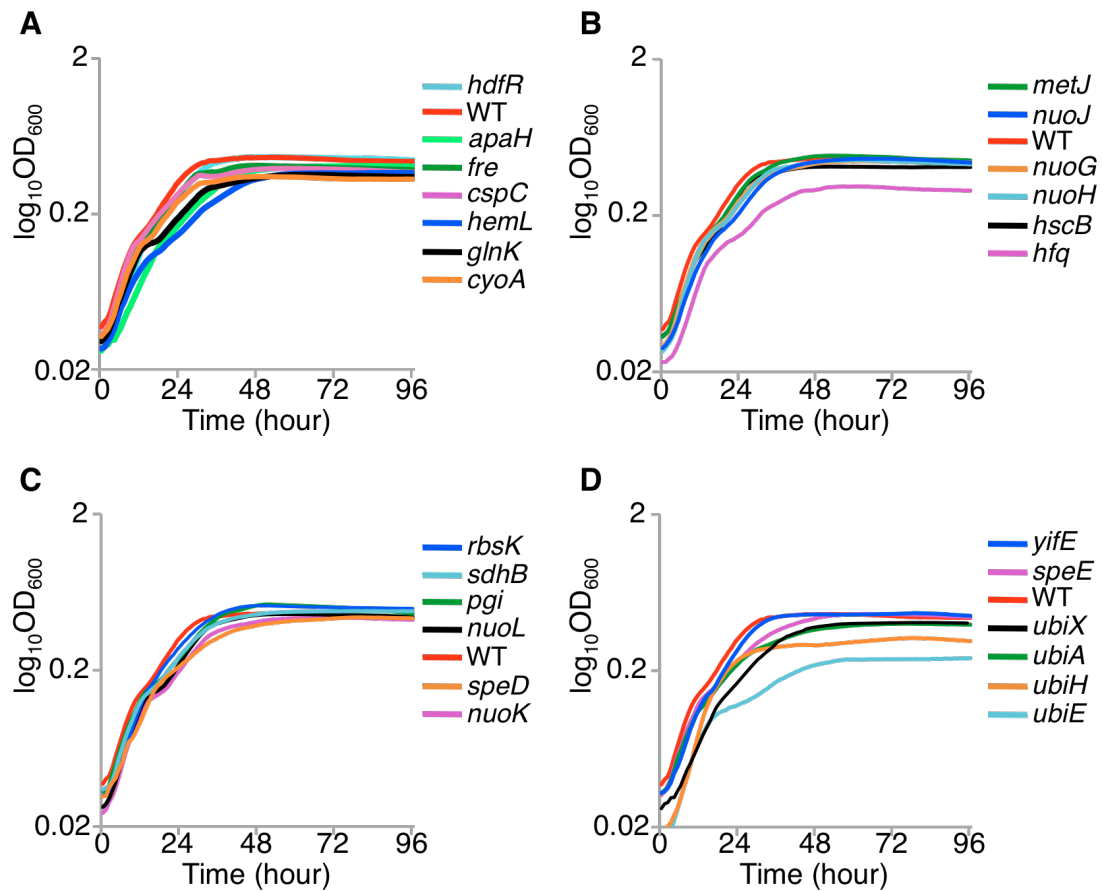

**Fig. S5. Stationary phase is not delayed in SIM network mutants defective in  $\sigma^S$  activity, indicating  $\sigma^S$ -response defects**

Mutants defective in activation of  $\sigma^S$ -controlled genes could be defective in inducing the  $\sigma^S$  response, or might in principle be slow growers that are delayed in entry into stationary phase, when the  $\sigma^S$  response is induced. The growth curves of the mutants show that none has delayed entry into stationary phase. Therefore, these mutants are  $\sigma^S$ -response defective, not defective in entering stationary phase in which the  $\sigma^S$  response is induced. Means of  $\geq 3$  experiments of three cultures per strain. Strains: WT (SMR10582) **(A)** *apaH* (SMR12830), *cspC* (SMR14263), *cyoA* (SMR14283), *fre* (SMR14267), *glnK* (SMR14281), *hdfR* (SMR14261) and *hemL* (SMR14431); **(B)** *hfq* (SMR14295) *hscB* (SMR14275), *metJ* (SMR14269), *nuoG* (SMR14420), *nuoH* (SMR14287) and *nuoJ* (SMR14289); **(C)** *nuoK* (SMR14285), *nuoL* (SMR14273), *pgi* (SMR13295), *rbsK* (SMR13312), *sdhB* (SMR14297) and *speD* (SMR12828); **(D)** *speE* (SMR13310), *ubiA* (SMR14447), *ubiE* (SMR12657), *ubiH* (SMR12686), *ubiX* (SMR12699) and *yifE* (SMR14259).

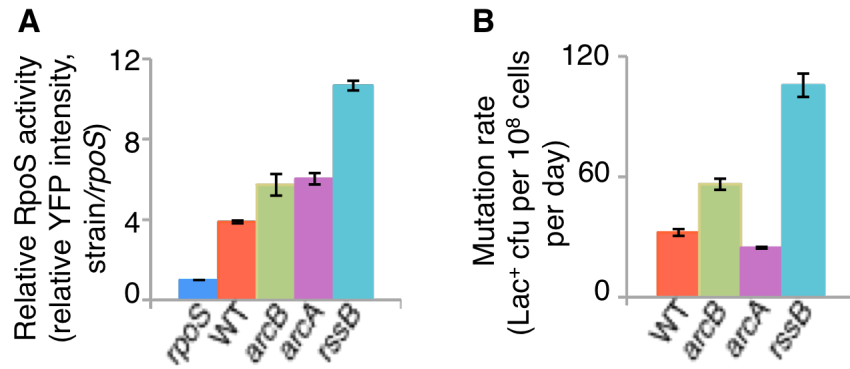

**Fig. S6. Upregulating  $\sigma^S$  by *arcB* and *rssB* mutations is correlated with increased stress-induced mutagenesis**

(A) Increase in  $\sigma^S$  activity for *arcB* (SMR12673), *arcA* (SMR12672) and *rssB* (SMR12566) mutants measured with the *yiaG-yfp* fusion per Fig. S4B and Methods. (B) Increased SIM in *arcB* (SMR12684) and *rssB* (SMR12692) mutants. Tables S8 and S9 show values for the increased  $\sigma^S$  activity and mutation rates for *arcB*, *arcA* and *rssB* mutants compared with controls.

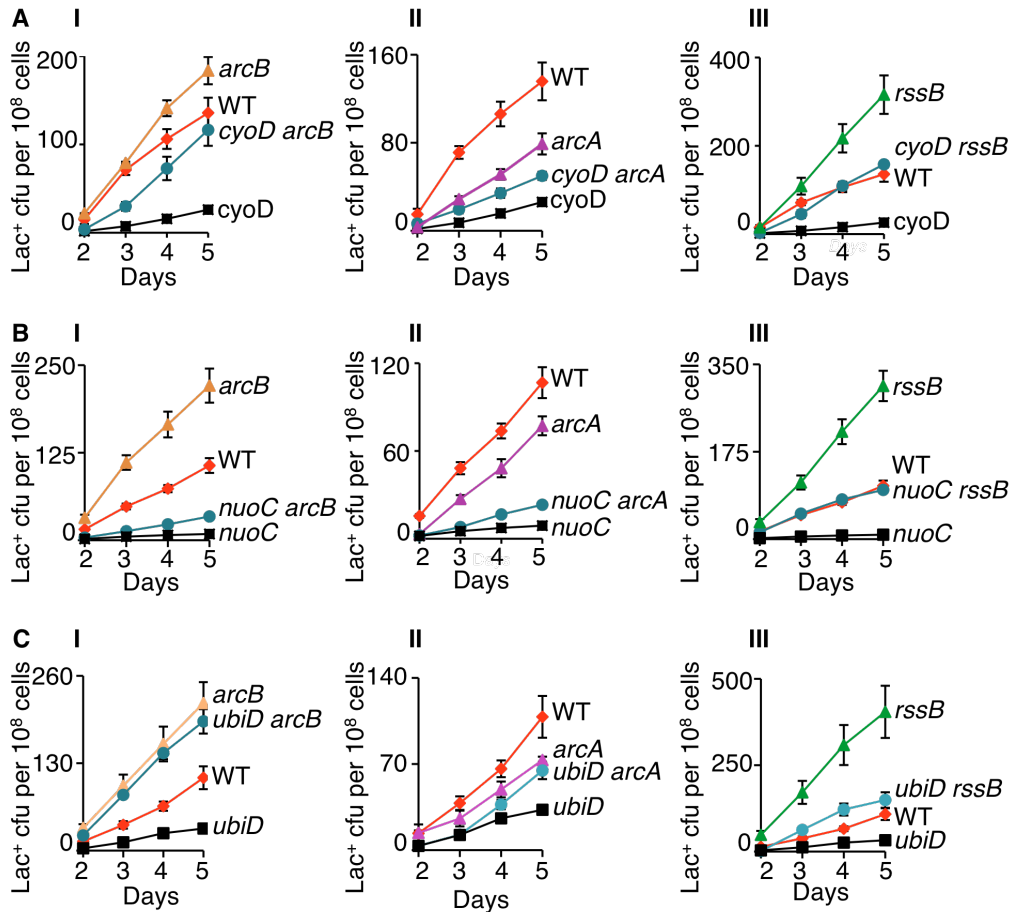

**Fig. S7.  $\sigma^S$ -expression-activating *arcB*, *arcA*, and *rssB* mutations restore or partially restore mutagenesis to electron-transfer mutants**

Representative examples of quantitative SIM assays showing restoration of SIM in *cyoD* (A), *nuoC* (B), and *ubiD* (C) electron-transfer mutants by *arcB* (I), *arcA* (II) or *rssB* (III) mutation. Quantification from multiple experiments shown in Fig. 4D-F and Table S9. Mutagenesis is restored significantly ( $P \leq 0.05$ ) by introduction of *arcB*, *arcA* or *rssB* mutation in the electron-transfer mutants *cyoD* (A-I-III), *nuoC* (B-I-III) and *ubiD* (C-I-III) (Table S9). For proteins for which restoration is complete or nearly so, such as UbiD suppressed by *arcB* or *arcA* mutations, we infer that the primary role of the protein (UbiD) in mutagenesis is upstream of ArcBA-inhibited transcriptional activation of *rpoS*. For proteins for which restoration is partial, NuoC and CyoD, these proteins may promote mutagenesis partially *via* their upregulation of  $\sigma^S$ , and partially *via* other mechanism(s). We note that *rssB* mutation could not be expected to suppress any of these mutations completely because RssB acts post-translationally, to target  $\sigma^S$  protein for degradation (50, 51), whereas the electron transfer proteins are likely to promote *rpoS* gene transcription and translation (Fig. 4L). That is, failure to degrade  $\sigma^S$  protein in the *rssB* mutant cannot fully compensate for mutations in which there is insufficient synthesis and translation of *rpoS* mRNA and thus  $\sigma^S$  protein.

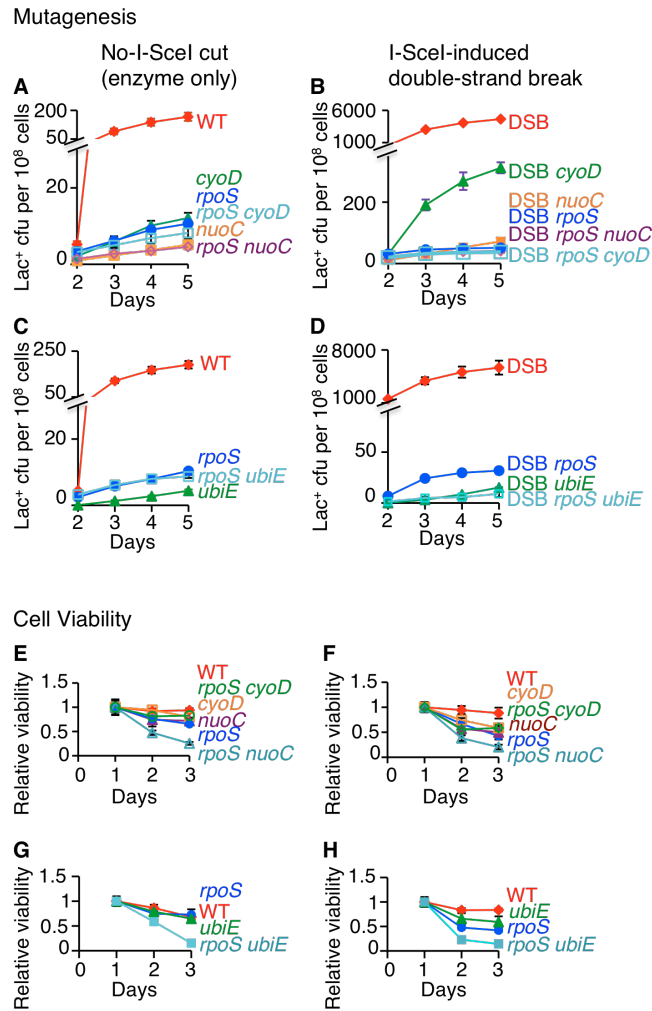

**Fig. S8. *rpoS* is epistatic to (acts in the same pathway as) *cyoD*, *nuoC*, and *ubiE* electron-transfer mutations in DSB-dependent SIM**

Representative examples. Fig. 4G-I and Table S10 for quantification of multiple experiments with many electron transfer mutants. **(A, C)** There is no greater mutagenesis defect in the each of the following double mutants than the *rpoS* single mutant control indicating that RpoS is epistatic to (acts in the same pathway as) these genes, in the standard Lac SIM assay (“enzyme-only”) **(A)** *rpoS cyoD* and *rpoS nuoC* mutants; **(C)** *rpoS ubiE*. **(B, D)** Using a sensitized, Lac SIM assay with mutagenesis enhanced by I-SceI-endonuclease cleavage near *lac* per (35), for maximal detection of any possible additive defects in SIM of the double mutants compared with the *rpoS* single mutants, there is still no greater mutagenesis defect in the following double mutants than the *rpoS* single-mutant control indicating that RpoS is epistatic to (acts in the same pathway as) these genes **(B)** *rpoS cyoD* and *rpoS nuoC* mutants; **(D)** *rpoS ubiE*. **(E-H)** Relative viabilities of the *lac*<sup>-</sup> cells during SIM [per (34)]. Only the *nuoC rpoS* and *ubiE rpoS* mutants without or with I-SceI-induced DSBs show slightly decreased viability compared with the *rpoS* single mutant alone by about 2-fold. For these strains, the Lac<sup>+</sup> cfu shown are normalized for Fig. 4, part of this Fig. and Table S10 for viability loss as described (I).

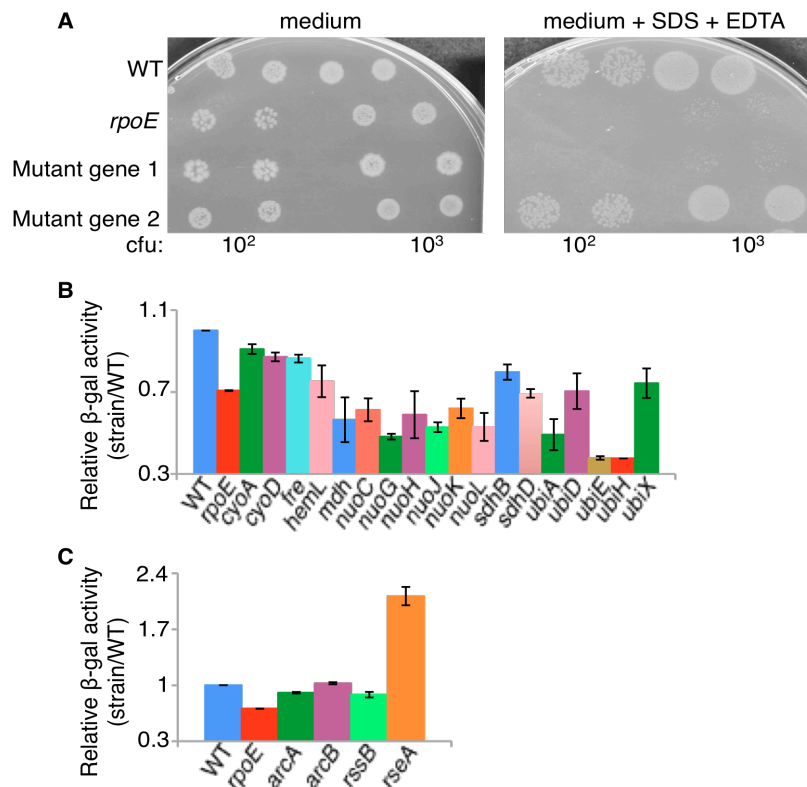

**Fig. S9. Identification SIM network mutants deficient in activation of the  $\sigma^E$  response**

**(A)** SDS-EDTA-sensitivity test for candidate  $\sigma^E$ -response-deficient mutants (Methods). The *rpoE2072::Tn10dCam* (8) positive control and one of the network mutants fail to grow on medium with SDS and EDTA (right) but grow on the same medium without SDS-EDTA (left). Of 93 SIM-down mutants, we find that 44 were sensitive to SDS-EDTA (Table S7) indicating membrane stress, and potential  $\sigma^E$ -response deficiency (20). Of those, 33 also showed reduced transcription from the  $\sigma^E$ -dependent *rpoHP3* promoter, confirming their roles in  $\sigma^E$ -response induction (B, and Tables S7, S11, Fig. 4J). However failure to activate this specific promoter under the particular assay conditions used does not rule out a role in  $\sigma^E$ -response induction during mutagenesis. **(B)** Confirmation of  $\sigma^E$  response induction-deficiency of the SDS-EDTA-sensitive mutants by  $\beta$ -galactosidase assay for  $\sigma^E$ -induced transcription from *rpoHP3-lacZ*. Per (20)  $\beta$ -galactosidase activity was assayed using the reporter strain CAG45114 [MG1655( $\lambda$  *rpoHP3-lacZ*)] (Methods, Table S11). Electron-transfer mutants for *cyoA* (SMR15330), *cyoD* (SMR15293), *fre* (SMR15362), *hemL* (SMR15319), *mdh* (SMR15356), *nuoC* (SMR15277), *nuoG* (SMR16038), *nuoH* (SMR15249), *nuoJ* (SMR15358), *nuoK* (SMR15366), *nuoL* (SMR15354), *sdhB* (SMR15261), *sdhD* (SMR15167), *ubiA* (SMR15321), *ubiD* (SMR15323), *ubiE* (SMR15257), *ubiH* (SMR15295) and *ubiX* (SMR15317) show significantly reduced  $\sigma^E$  activity at *rpoHP3*, as do mutants for 15 other SIM network genes (*P* values Table S11, Fig 4J, remaining mutants tested). **(C)** *arcB* (SMR12673), *arcA* (SMR12672), or *rssB* (SMR12566) mutations, which cause upregulation of  $\sigma^S$  (50, 51) and suppress the  $\sigma^S$  response-defects of electron-transfer mutants (Fig. 4D-F, Table S9), do not affect  $\sigma^E$  activity. Therefore, the electron-transfer

proteins activate the  $\sigma^E$  response independently of their effects on the *arcB*, *arcA* and *rssB* regulatory systems. WT (CAG45114), *rpoE* (SMR15311) and *rseA* (SMR15754,  $\sigma^E$ -response constitutive). Table S11 for numerical values and detailed description of assay. The *rpoH*-P3-*lacZ* reporter strains used in Fig. 4J follow: *arcA* (SMR15360), *apaH* (SMR15328), *fruR* (SMR15253), *lipB* (SMR15259), *lon* (SMR15273), *lrp* (SMR15265), *pstB* (SMR15301), *pstC* (SMR15287), *rppH* (SMR15315), *trxB* (SMR15283), *ygfA* (SMR15326), *yigP* (SMR15309), *znuC* (SMR15291), and *rpoE* (SMR15311) (Table S4).



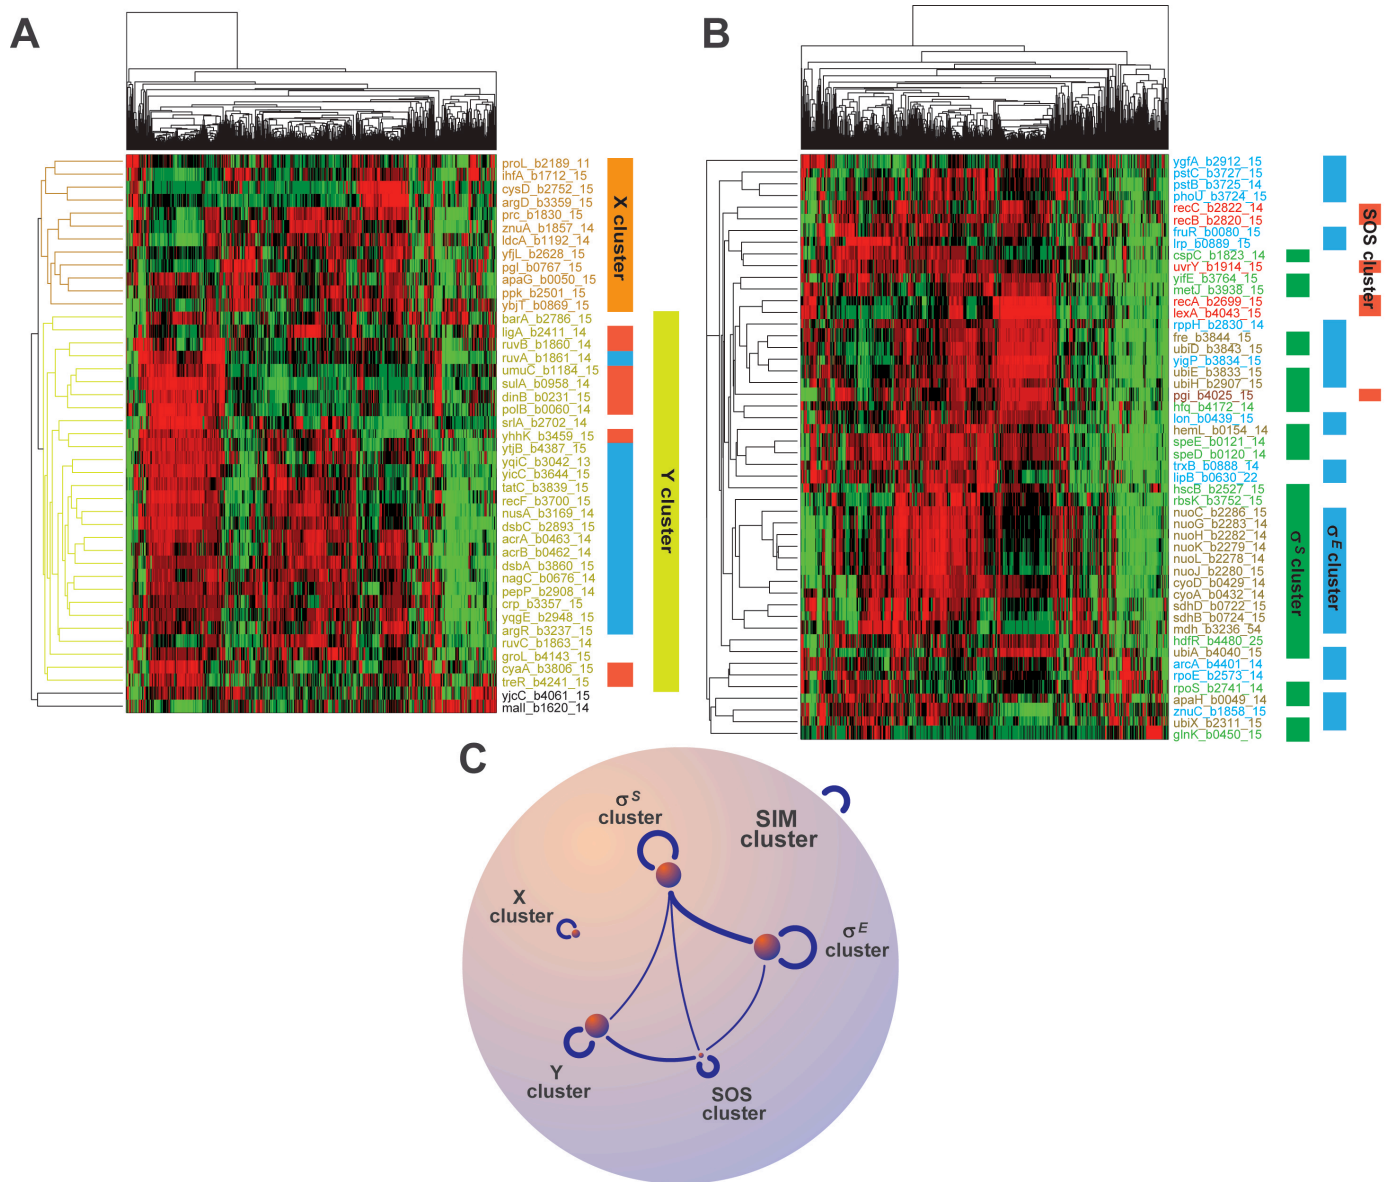

**Fig. S10. Cluster analysis with large-scale microarray data identifies additional sub-networks**

(A) Among 43 of the total 93 SIM genes that were not classified by functional studies as activators of the  $\sigma^E$ ,  $\sigma^S$ , or SOS pathways, indicated in blue, green, and red, respectively, hierarchical clustering of gene expression data from the Many Microbial Microarrays Databank (13) identified two additional clusters (cluster X and cluster Y). (B) The  $\sigma^E$ ,  $\sigma^S$ , or SOS clusters shown respectively, in blue, green, and red. (C) Calculating average gene expression between clusters resulted in a cluster coexpression network. In this network, statistically significant coexpression levels are indicated by blue lines with their thickness proportional to the integer number of standard deviations from a level of coexpression expected by chance; the radius of the network nodes is proportional to the number of genes within that cluster. This analysis suggests functional divergence of

cluster X, which does not yield any significant coexpression with any of the others; in contrast, cluster Y is significantly coexpressed with both the SOS (red in panel A) and with the  $\sigma^S$  cluster (blue in panel A), thus suggesting some functional similarity. Cluster analysis was performed with Matlab computer software (Mathworks Inc., Natick, MA, USA) version 7.13.0.64 (R2011B) by using the clustergram command in the Matlab Bioinformatics Toolbox. Non-parametric statistical significance of a network link was established by standardizing through mean and standard deviation from a sampling of one million random clusters.

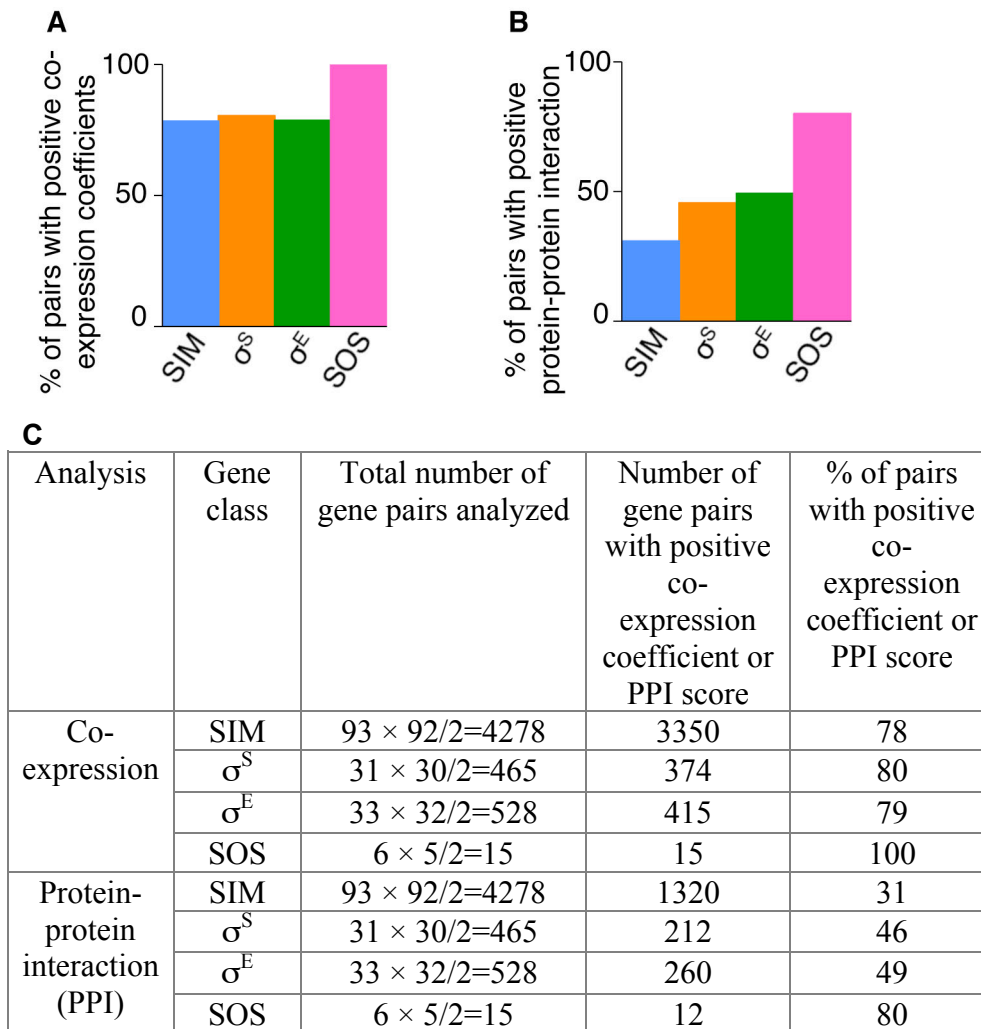

**Fig. S11. Positive gene co-expression coefficients and protein-protein interaction scores for the mutant genes upstream of  $\sigma^S$ ,  $\sigma^E$  and SOS stress responses.**

Gene co-expression coefficients and protein-protein interaction (PPI) scores were determined for all SIM mutants and for the genes upstream of each of the three stress responses as described in Fig. S3. The percents of the pairs of genes compared for upstream of  $\sigma^S$ ,  $\sigma^E$  or SOS responses that have positive correlation coefficients (**A**) or protein-protein interaction scores (**B**) were determined as follows: (number of gene pairs with positive co-expression coefficient or protein-protein interaction score/total number of gene pairs analyzed)  $\times$  100. (**C**) The same data in tabular form show the number of pairs with positive correlation out of the total 4278 pairs compared.

**Table S1. Summary of stress-induced-mutagenesis network genetic analyses.**

**Four mutation assays.** Fold-defects of the SIM network mutants are relative to the mutation rates in the wild-type strain. *P* values differ significantly from the WT ( $\leq 0.05$ ) in all four mutation assays except for nine mutants the names of which are annotated with<sup>13</sup>. This confirms 43 of 52 tested in the Tet assay, and 41 of 50 tested in the Nal mutation assay. Of the nine not confirmed, all but two, *ldcA* and *yqiC*, are SDS-EDTA sensitive, indicating membrane stress and possible membrane-stress ( $\sigma^E$ )-response defects. The roles of these proteins in SIM might be *via* activating the  $\sigma^E$  response, which promotes mutagenesis by promoting spontaneous DNA breaks, and so is superfluous when DSBs are provided by I-*SceI* (8), as in the Tet (2) and Nal assays (Methods). Of the two remaining, *yqiC* encodes a putative membrane protein (Table S2) and *ldcA* encodes L,D-carboxypeptidase which has an essential function in murein (peptidoglycan) recycling (52), and so might also be defective in inducing the  $\sigma^E$ -membrane-protein stress response under the conditions of our SIM assay. NT, not tested; Q, tested in qualitative papillation assay only.

**Summary of stress-response-activation pathways data.** See the tables and figures cited below for descriptions of the quantitative data summarized qualitatively here. Suppressor and epistasis analyses were conducted on one mutant of each of the following protein machines or pathways, and the data for the gene tested are given: *cyoD* tested for CyoAD; *nuoC* tested for NuoC, NuoG, NuoH, NuoJ, NuoK, and NuoL components of NADH oxidoreductase; *ubiD* or *ubiE* tested for UbiA, UbiD, UbiE, UbiH, and UbiX components of ubiquinone biosynthesis; *sdhD* for SdhBD. The genes not tested in each protein machine or pathway group are expected to have similar phenotypes, which we represent by showing for each the data for the gene tested marked with \*.

| Mutant gene               | Papillation Assay: Mean fold decrease in number of papillae (WT/mutant) $\pm$ SEM <sup>1</sup> | Quantitative Lac Assay: Mean fold decrease mutation rate (WT/mutant) $\pm$ SEM <sup>2</sup> | Tet Assay: Mean fold decrease in Tet <sup>R</sup> mutant frequency (WT/mutant) $\pm$ SEM <sup>3</sup> | Nal Assay: Mean fold decrease in Nal <sup>R</sup> mutant frequency (WT/mutant) $\pm$ SEM <sup>4</sup> | $\sigma^S$ upstream <sup>5</sup> | Suppressor tests, % mutation restored by <i>arcB</i> , <i>arcA</i> , <i>rssB</i> respectively <sup>6</sup> | Epistatic w. <i>rpoS</i> <sup>7</sup> | $\sigma^E$ upstream probable (SDS/EDTA) <sup>8</sup> | $\sigma^E$ upstream confirmed <sup>9</sup> | UV sensitivity <sup>10</sup> | SOS upstream <sup>11</sup> |
|---------------------------|------------------------------------------------------------------------------------------------|---------------------------------------------------------------------------------------------|-------------------------------------------------------------------------------------------------------|-------------------------------------------------------------------------------------------------------|----------------------------------|------------------------------------------------------------------------------------------------------------|---------------------------------------|------------------------------------------------------|--------------------------------------------|------------------------------|----------------------------|
| <i>srlA</i>               | 1.6 $\pm$ 0.2                                                                                  | 1.5 $\pm$ 0.04                                                                              | NT                                                                                                    | NT                                                                                                    | -                                |                                                                                                            |                                       | -                                                    |                                            | R                            |                            |
| <i>ybjT</i>               | 1.8 $\pm$ 0.2                                                                                  | 1.5 $\pm$ 0.2                                                                               | NT                                                                                                    | 3.2 $\pm$ 0.6                                                                                         | -                                |                                                                                                            |                                       | -                                                    |                                            | R                            |                            |
| <i>treR</i>               | 1.9 $\pm$ 0.1                                                                                  | 1.5 $\pm$ 0.1                                                                               | NT                                                                                                    | 2.8 $\pm$ 1                                                                                           | -                                |                                                                                                            |                                       | -                                                    |                                            | R                            |                            |
| <i>yjcC</i>               | 3.1 $\pm$ 0.3                                                                                  | 1.5 $\pm$ 0.06                                                                              | 22 $\pm$ 3                                                                                            | 3.4 $\pm$ 1.1                                                                                         | -                                |                                                                                                            |                                       | -                                                    |                                            | S                            | -                          |
| <i>yicC</i>               | 3 $\pm$ 0.1                                                                                    | 1.5 $\pm$ 0.1                                                                               | 2.6 $\pm$ 0.5                                                                                         | 3.7 $\pm$ 1.4                                                                                         | -                                |                                                                                                            |                                       | -                                                    |                                            | R                            |                            |
| <i>ytiB</i>               | 3 $\pm$ 0.1                                                                                    | 1.6 $\pm$ 0.1                                                                               | 16 $\pm$ 8                                                                                            | 7.9 $\pm$ 3.3                                                                                         | -                                |                                                                                                            |                                       | -                                                    |                                            | R                            |                            |
| <i>arcA</i>               | 2.9 $\pm$ 0.1                                                                                  | 1.7 $\pm$ 0.1                                                                               | 30 $\pm$ 17                                                                                           | 2.4 $\pm$ 0.6                                                                                         | -                                |                                                                                                            |                                       | +                                                    | +                                          | R                            |                            |
| <i>ligA</i>               | 1.7 $\pm$ 0.1                                                                                  | 1.7 $\pm$ 0.07                                                                              | NT                                                                                                    | NT                                                                                                    | -                                |                                                                                                            |                                       | -                                                    |                                            | S                            | -                          |
| <i>yqgE</i>               | 2.2 $\pm$ 0.3                                                                                  | 1.7 $\pm$ 0.06                                                                              | 8 $\pm$ 2                                                                                             | 5 $\pm$ 1.8                                                                                           | -                                |                                                                                                            |                                       | -                                                    |                                            | S                            | -                          |
| <i>argD</i>               | 2.2 $\pm$ 0.1                                                                                  | 1.8 $\pm$ 0.2                                                                               | NT                                                                                                    | NT                                                                                                    | -                                |                                                                                                            |                                       | -                                                    |                                            | R                            |                            |
| <i>apaG</i>               | 2.1 $\pm$ 0.01                                                                                 | 1.8 $\pm$ 0.1                                                                               | NT                                                                                                    | NT                                                                                                    | -                                |                                                                                                            |                                       | -                                                    |                                            | R                            |                            |
| <i>yjlL</i>               | 3 $\pm$ 0.2                                                                                    | 1.8 $\pm$ 0.05                                                                              | NT                                                                                                    | 5.2 $\pm$ 1.5                                                                                         | -                                |                                                                                                            |                                       | -                                                    |                                            | R                            |                            |
| <i>acrB</i>               | 3.6 $\pm$ 0.7                                                                                  | 1.8 $\pm$ 0.1                                                                               | 13 $\pm$ 3                                                                                            | 11.8 $\pm$ 6.6                                                                                        | -                                |                                                                                                            |                                       | +                                                    | -                                          | R                            |                            |
| <i>mall</i>               | 2.4 $\pm$ 0.3                                                                                  | 2.0 $\pm$ 0.2                                                                               | 6.3 $\pm$ 3.7                                                                                         | 4.5 $\pm$ 1.7                                                                                         | -                                |                                                                                                            |                                       | -                                                    |                                            | R                            |                            |
| <i>lrp</i>                | 2.1 $\pm$ 0.2                                                                                  | 2.0 $\pm$ 0.4                                                                               | 2.6 $\pm$ 0.8                                                                                         | 2.9 $\pm$ 1                                                                                           | -                                |                                                                                                            |                                       | +                                                    | +                                          | R                            |                            |
| <i>acrA</i>               | 3.2 $\pm$ 0.6                                                                                  | 2.3 $\pm$ 0.8                                                                               | 7 $\pm$ 3                                                                                             | 13 $\pm$ 4.2                                                                                          | -                                |                                                                                                            |                                       | +                                                    | -                                          | R                            |                            |
| <i>uvrY</i>               | 1.9 $\pm$ 0.1                                                                                  | 2.3 $\pm$ 0.5                                                                               | NT                                                                                                    | NT                                                                                                    | -                                |                                                                                                            |                                       | -                                                    |                                            | S                            | +                          |
| <i>trxB</i> <sup>13</sup> | 3.5 $\pm$ 0.1                                                                                  | 2.5 $\pm$ 0.3                                                                               | 1.3 $\pm$ 0.3                                                                                         | 1.4 $\pm$ 0.4                                                                                         | -                                |                                                                                                            |                                       | +                                                    | +                                          | R                            |                            |

|                           |            |            |             |            |   |             |    |   |   |   |   |
|---------------------------|------------|------------|-------------|------------|---|-------------|----|---|---|---|---|
| <i>fre</i>                | 11 ± 0.7   | 2.5 ± 0.2  | 8 ± 2       | 10.5 ± 2.3 | + |             | +  | + | + | R |   |
| <i>cspC</i>               | 2 ± 0.05   | 2.6 ± 0.2  | 5.7 ± 0.6   | 7.7 ± 2.3  | + |             |    | - |   | R |   |
| <i>barA</i>               | 3 ± 0.4    | 2.6 ± 0.7  | 5 ± 1       | 6.2 ± 2.3  | - |             |    | - |   | R |   |
| <i>prc</i>                | 1.7 ± 0.04 | 2.7 ± 0.5  | NT          | 3.4 ± 0.9  | - |             |    | - |   | R |   |
| <i>pepP</i>               | 4.5 ± 0.3  | 2.7 ± 0.2  | NT          | NT         | - |             |    | - |   | R |   |
| <i>pstB</i>               | 7.2 ± 1.6  | 2.8 ± 0.9  | 2.4 ± 0.3   | 3 ± 1      | - |             |    | + | + | S | - |
| <i>ubiX</i>               | 2.3 ± 0.2  | 2.8 ± 0.4  | NT          | NT         | + | *86, 87, 51 | *+ | + | + | R |   |
| <i>znuC</i>               | 1.7 ± 0.08 | 2.9 ± 0.6  | 5 ± 1       | 4.7 ± 1.8  | - |             |    | + | + | R |   |
| <i>crp</i>                | NT         | 3.1 ± 0.3  | NT          | NT         | - |             |    | - |   | R |   |
| <i>ubiD</i>               | 3.5 ± 0.3  | 3.1 ± 0.6  | NT          | NT         | + | 86, 87, 51  | *+ | + | + | R |   |
| <i>yhhK</i>               | 9.8 ± 3.2  | 3.2 ± 0.3  | NT          | NT         | - |             |    | - |   | R |   |
| <i>metJ</i>               | 2 ± 0.2    | 3.3 ± 0.6  | 2.4 ± 0.7   | 2.2 ± 0.2  | + |             |    | - |   | R |   |
| <i>phoU</i>               | 5.6 ± 1.1  | 3.5 ± 0.2  | 2.8 ± 0.7   | NT         | - |             |    | + | + | R |   |
| <i>lipB</i>               | 7.7 ± 0.4  | 3.7 ± 0.2  | 4 ± 2       | NT         | - |             |    | + | + | R |   |
| <i>proL</i>               | 2.4 ± 0.07 | 3.8 ± 0.2  | 5 ± 1       | 4.2 ± 1.2  | - |             |    | - |   | R |   |
| <i>speD</i>               | 3.6 ± 0.1  | 3.9 ± 0.5  | 12 ± 6      | 3.5 ± 0.9  | + |             |    | - |   | R |   |
| <i>cysD</i> <sup>13</sup> | 3.3 ± 0.2  | 3.9 ± 1.9  | 1.9 ± 0.2   | 2.6 ± 1.1  | - |             |    | + | - | R |   |
| <i>sdhD</i>               | 3.1 ± 0.2  | 4.2 ± 1.6  | NT          | NT         | + |             | +  | + | + | R |   |
| <i>speE</i>               | 3 ± 0.2    | 4.2 ± 0.5  | 12 ± 2      | 3.8 ± 1    | + |             |    | + | - | R |   |
| <i>fruR</i> <sup>13</sup> | 3.4 ± 0.9  | 4.2 ± 0.5  | 0.7 ± 0.1   | 1.6 ± 0.3  | - |             |    | + | + | R |   |
| <i>argR</i>               | 3.1 ± 0.6  | 4.3 ± 0.3  | 3.8 ± 0.8   | 5.1 ± 1    | - |             |    | - |   | R |   |
| <i>pgl</i>                | 2.3 ± 0.3  | 4.3 ± 0.5  | NT          | NT         | - |             |    | - |   | S | - |
| <i>znuA</i>               | 1.7 ± 0.1  | 4.6 ± 1.4  | 4.1 ± 0.8   | NT         | - |             |    | + | - | R |   |
| <i>pstC</i>               | 6 ± 1.2    | 4.7 ± 0.2  | 2.4 ± 0.4   | NT         | - |             |    | + | + | R |   |
| <i>dsbC</i>               | 5 ± 0.1    | 5 ± 0.7    | NT          | NT         | - |             |    | - |   | R |   |
| <i>cyoD</i>               | 3.9 ± 0.2  | 5.3 ± 1.8  | NT          | NT         | + | 56, 56, 39  | +  | + | + | R |   |
| <i>hscB</i>               | 4.3 ± 0.3  | 5.2 ± 0.5  | 7 ± 1       | 2.6 ± 1.1  | + |             | +  | - |   | S | - |
| <i>cyoA</i>               | 4.2 ± 0.3  | 5.5 ± 0.5  | 2.5 ± 0.8   | 4.6 ± 1.2  | + | *56, 56, 39 |    | + | + | R |   |
| <i>apaH</i>               | 8.4 ± 1.1  | 5.6 ± 1.1  | 2.8 ± 0.6   | 2.2 ± 0.3  | + |             |    | + | + | R |   |
| <i>yqiC</i> <sup>13</sup> | 3.3 ± 0.4  | 5.7 ± 0.7  | 0.8 ± 0.2   | 1.4 ± 0.2  | - |             |    | - |   | R |   |
| <i>sdhB</i>               | 3 ± 0.3    | 5.7 ± 0.6  | 1.8 ± 0.3   | 3.9 ± 0.8  | + |             | *+ | + | + | R |   |
| <i>glnK</i>               | 2.2 ± 0.4  | 6 ± 3      | 7 ± 3       | 3.9 ± 1.7  | + |             |    | - |   | R |   |
| <i>tatC</i> <sup>13</sup> | 2.3 ± 0.2  | 6.5 ± 2.2  | 0.5 ± 0.1   | 2 ± 1      | - |             |    | + | - | R |   |
| <i>cyaA</i>               | 26 ± 7     | 7.3 ± 0.6  | NT          | NT         | - |             |    | - |   | R |   |
| <i>mdh</i>                | 4.3 ± 0.3  | 7.6 ± 1.7  | 64 ± 16     | 8 ± 4      | + |             | +  | + | + | R |   |
| <i>yigP</i>               | 11 ± 2.5   | 7.6 ± 1.3  | 4 ± 2       | 4.5 ± 0.9  | - |             |    | + | + | R |   |
| <i>ygfA</i>               | 4.6 ± 0.03 | 7.7 ± 2.1  | 9 ± 3       | 5.4 ± 2.1  | - |             |    | + | + | R |   |
| <i>pgi</i>                | 8.6 ± 1.8  | 8.1 ± 1.1  | 2.6 ± 0.6   | 2.6 ± 0.7  | + |             | +  | - |   | S | + |
| <i>nuoK</i>               | 3.9 ± 0.5  | 8.7 ± 0.2  | NT          | NT         | + | *24, 31, 18 | *+ | + | + | R |   |
| <i>hdfR</i>               | 6.3 ± 0.4  | 9.2 ± 3.1  | 6 ± 2       | 6.2 ± 2.9  | + |             |    | - |   | S | - |
| <i>hemL</i>               | 7.8 ± 1.2  | 9.7 ± 1.3  | 5 ± 1       | NT         | + |             | +  | + | + | S | - |
| <i>rbsK</i>               | 4.2 ± 0.4  | 10.1 ± 0.5 | 9 ± 3       | 3.9 ± 0.2  | + |             |    | - |   | R |   |
| <i>nuoG</i>               | 3 ± 0.3    | 10.2 ± 0.2 | NT          | NT         | + | *24, 31, 18 | *+ | + | + | R |   |
| <i>ldcA</i> <sup>13</sup> | 34 ± 5     | 10.4 ± 2.7 | 0.36 ± 0.07 | 2.6 ± 1    | - |             |    | - |   | S | - |
| <i>nagC</i>               | 4.2 ± 0.3  | 11 ± 1.4   | NT          | NT         | - |             |    | - |   | R |   |
| <i>lon</i>                | 3 ± 0.2    | 11.4 ± 1.4 | 5 ± 2       | 11.2 ± 7.3 | - |             |    | + | + | S | - |
| <i>rpoE</i> <sup>12</sup> | 13 ± 2.4   | 11 ± 3 (8) | NT          | NT         | - |             |    | + | + | R |   |
| <i>rppH</i> <sup>13</sup> | 9.3 ± 0.3  | 11.7 ± 1.9 | 0.9 ± 0.1   | 2.5 ± 0.8  | - |             |    | + | + | R |   |
| <i>yifE</i>               | 6.3 ± 0.3  | 12.1 ± 1.4 | 4 ± 1       | 9.6 ± 5.3  | + |             |    | - |   | S | - |
| <i>nuoH</i>               | 3.3 ± 0.4  | 12.5 ± 2.1 | NT          | NT         | + | *24, 31, 18 | *+ | + | + | R |   |
| <i>dsbA</i>               | 3.6 ± 0.4  | 13 ± 1.8   | NT          | 3.2 ± 1    | - |             |    | - |   | R |   |
| <i>ubiH</i>               | 29 ± 4     | 13.6 ± 0.2 | 11 ± 4      | NT         | + | *86, 87, 51 | *+ | + | + | R |   |
| <i>nuoL</i>               | 4.3 ± 0.6  | 14.7 ± 2.8 | 2.7 ± 0.8   | NT         | + | *24, 31, 18 | *+ | + | + | R |   |
| <i>nuoC</i>               | 4.9 ± 0.4  | 16 ± 0.5   | 6 ± 2       | 4.8 ± 1.5  | + | 24, 31, 18  | +  | + | + | R |   |
| <i>nuoJ</i>               | 3.4 ± 0.4  | 16 ± 0.3   | NT          | NT         | + | *24, 31, 18 | *+ | + | + | R |   |

|                                |           |                |                |           |   |             |    |   |   |   |   |
|--------------------------------|-----------|----------------|----------------|-----------|---|-------------|----|---|---|---|---|
| <i>hfq</i>                     | 7 ± 0.3   | 16.4 ± 2       | 45 ± 16        | 3.1 ± 1   | + |             |    | + | - | S | - |
| <i>ubiE</i>                    | 24 ± 1.9  | 18.2 ± 2.6     | 13 ± 6         | 22 ± 7    | + | *86, 87, 51 | +  | + | + | R |   |
| <i>ubiA</i>                    | 30 ± 3    | 30.7 ± 2.1     | NT             | NT        | + | *86, 87, 51 | *+ | + | + | S | - |
| <i>ihfA</i>                    | 36 ± 3.2  | 175 ± 33       | 23 ± 9         | 5.5 ± 2.3 | - |             |    | + | - | R |   |
| <i>ppk</i> <sup>12, 13</sup>   | Q         | 2.9 (53)       | 0.9 ± 0.4      | 2.5 ± 0.8 | - |             |    | + | - | R |   |
| <i>groES</i> <sup>12, 13</sup> | Q         | 10 (54)        | 1.2 ± 0.1      | 2.6 ± 1   | - |             |    | + | - | R |   |
| <i>dinB</i> <sup>12</sup>      | 4 ± 0.2   | 3.3 ± 0.5 (35) | 5.5 ± 0.75 (2) | 4.4 ± 1.3 | - |             |    | - |   | R |   |
| <i>nusA</i> <sup>12</sup>      | NT        | 470 (55)       |                |           | - |             |    | + | - | S | - |
| <i>umuC</i>                    | NT        | 1.2 ± 0.2 (56) | 1.7 ± 0.25 (2) | 5.6 ± 1.3 | - |             |    | - |   | S | - |
| <i>lexA3</i> <sup>12</sup>     | 3.8 ± 0.5 | 3.3 ± 0.4 (57) | 5.2 ± 0.54 (2) | 20 ± 5    | - |             |    | - |   | S | + |
| <i>recA</i> <sup>12</sup>      | 37 ± 9    | 100 ± 30 (57)  | 16 ± 3.6 (2)   | 35 ± 15   | - |             |    | - |   | S | + |
| <i>recB</i> <sup>12</sup>      | 5.5 ± 0.4 | 36 ± 7 (58)    | 220 ± 130 (2)  | 32 ± 10   | - |             |    | - |   | S | + |
| <i>recC</i> <sup>12</sup>      | 4.8 ± 0.8 |                | NT             | NT        | - |             |    | - |   | S | + |
| <i>recF</i> <sup>12</sup>      | NT        | 3.1 (57)       | NT             | NT        |   |             |    |   |   | S | - |
| <i>rpoS</i> <sup>12</sup>      | 6.5 ± 1   | 9.3 ± 1.2 (59) | 25 ± 12 (2)    | 4.5 ± 1.7 | + |             |    | - |   | S | - |
| <i>ruvA</i> <sup>12</sup>      | NT        | 18 ± 6 (57)    | NT             | NT        | - |             |    | - |   | S | - |
| <i>ruvB</i> <sup>12</sup>      | NT        | 16 ± 5 (57)    | NT             | NT        | - |             |    | - |   | S | - |
| <i>ruvC</i> <sup>12</sup>      | NT        | 20 ± 8 (57)    | 5.8 ± 0.5 (2)  | 121 ± 52  | - |             |    | - |   | S | - |
| <i>sulA</i> <sup>12</sup>      | Q         | 1.4 (56)       | NT             | NT        | - |             |    | - |   | R |   |

Data taken from the following:

<sup>1</sup> Quantification from the Lac-papillation colony-screen assay (Methods).

<sup>2</sup> Table S3

<sup>3</sup> Table S5 (and Fig. 2)

<sup>4</sup> Table S5 (and Fig. 2)

<sup>5</sup> Transcription from  $\sigma^S$ -controlled chromosomal *yiaG-yfp* (+, partially or fully required; -, not required).

Figs. 4A, S4, Tables S7, S8

<sup>6</sup> Figs. 4D-F, S7, Table S9

<sup>7</sup> Figs. 4G-I, S8, Table S10

<sup>8</sup> SDS/EDTA-sensitivity (+, sensitive; -, resistant), Tables S7, S11

<sup>9</sup> Transcription from  $\sigma^E$ -controlled *rpoHP3-lacZ* (+, partially or fully required; -, not required). Figs. 4J, S8, Table S11

<sup>10</sup> Table S7. S, sensitive; R, resistant

<sup>11</sup> Transcription from the SOS-controlled chromosomal  $\Delta att\lambda$ -*P<sub>sulA</sub>-gfp* (+, partially or fully required; -, not), Fig. 4K

<sup>12</sup> For these mutants, quantitative Lac reversion data and, for some, Tet reversion data, are taken from the papers cited after the data.

<sup>13</sup> These mutants show insignificant SIM deficiency ( $P > 0.05$ ) in the Tet and Nal assays.

**Table S2. Genes of the stress-induced-mutagenesis network**

List of the Tn-insertion mutant genes that function in SIM, isolated by papillation screen, and confirmed by quantitative Lac mutation assay (Table S3), plus previously identified SIM genes, plus *crp*, identified by candidate-gene approach here, and their descriptions. Genes annotated “F”, for found, under “Previously Known” were previously identified as required for SIM and also identified in our screens (references listed, those that showed the requirement). Some genes previously known to be required for SIM (per the references cited) were not found by the papillation screen (annotated “N”, for not found, under “Previously Known”), most for reasons we understand: *dinB* is present in two copies in Lac assay strains used in the primary screen, one in the chromosome and one in an F’ plasmid, and both copies must be mutated to observe SIM-deficiency (60), which is very unlikely in a transposon mutagenesis and screen. Special *lexA* mutations called *lexAInd*, which encode an uncleavable LexA transcriptional repressor protein, cause SIM defect (32, 56), and these cannot be created by Tn insertion. *nusA* is an essential gene the defect of which is studied with temperature-sensitive alleles (61, 62), and an appropriate conditional mutation may not have been obtainable by Tn insertion. *polB* accounts for ~15% of stress-induced frameshift reversion and shows its SIM-defective phenotype only in cells lacking *dinB* (35), which accounts for the other 85%, and so would not be expected to be identified in our screen. *umuCD*, encoding DNA polymerase V, is required for some of the DSB-dependent stress-induced loss-of-function mutations in the *ampD* gene (63) and some DSB-dependent stress-induced reversion of a *tet* frameshift allele (2) but not reversion of the *lac* allele used in our primary screen (32, 56), so could not have been found in this screen. Mutant alleles of the *ruvA*, *ruvB*, and *ruvC* mutations render the primary screen ineffective because all cause the entire colony to turn blue obscuring observation of blue mutant papillae.

| Classification | Gene        | Gene-product description                                                                                                  | Reference(s) | SIM defect strength <sup>1</sup> | Previously known (F/N) |
|----------------|-------------|---------------------------------------------------------------------------------------------------------------------------|--------------|----------------------------------|------------------------|
| Regulators     | <i>arcA</i> | Dual transcriptional regulator for anoxic redox control and a response regulator of ArcBA two component regulatory system | (64, 65)     | W                                |                        |
|                | <i>argR</i> | DNA-binding transcriptional dual regulator                                                                                | (66, 67)     | M                                |                        |
|                | <i>barA</i> | Sensor kinase of BarA-UvrY two component regulatory system                                                                | (68)         | W                                |                        |
|                | <i>crp</i>  | Transcriptional dual regulator                                                                                            | (69)         | M                                |                        |
|                | <i>cyaA</i> | Adenylate cyclase synthesizes c-AMP; c-AMP-CRP complex is a DNA binding transcriptional dual regulator                    | (70)         | M                                |                        |
|                | <i>fruR</i> | Dual transcriptional regulator involved in carbon metabolism                                                              | (71)         | M                                |                        |
|                | <i>glnK</i> | Nitrogen assimilation regulatory protein                                                                                  | (72)         | M                                |                        |
|                | <i>hdfR</i> | Dual transcriptional regulator                                                                                            | (73, 74)     | S                                |                        |
|                | <i>ihfA</i> | Integration host factor, $\alpha$ subunit; DNA-binding transcriptional dual regulator                                     | (75)         | S                                |                        |

|                                    |              |                                                                                                                                            |          |   |   |
|------------------------------------|--------------|--------------------------------------------------------------------------------------------------------------------------------------------|----------|---|---|
|                                    | <i>lexA</i>  | Transcriptional repressor of the SOS DNA-damage response genes                                                                             | (32, 56) | M | N |
|                                    | <i>lrp</i>   | DNA-binding transcriptional dual regulator                                                                                                 | (76)     | W |   |
|                                    | <i>mall</i>  | Transcriptional repressor                                                                                                                  | (77)     | W |   |
|                                    | <i>metJ</i>  | DNA binding transcriptional repressor                                                                                                      | (78)     | M |   |
|                                    | <i>nagC</i>  | Transcriptional dual regulator; regulates phosphotransferase system                                                                        | (79)     | S |   |
|                                    | <i>nusA</i>  | Transcription/antitermination factor, essential gene                                                                                       | (55)     | S | N |
|                                    | <i>phoU</i>  | Negative regulator of PhoR/PhoB two-component regulatory system                                                                            | (80)     | M |   |
|                                    | <i>ppk</i>   | Polyphosphate kinase, involved in stress responses in some bacteria                                                                        | (53)     | W | F |
|                                    | <i>rpoE</i>  | Encodes $\sigma^E$ transcription factor; transcriptional activator of the membrane protein stress response, dual transcriptional regulator | (8)      | S |   |
|                                    | <i>rpoS</i>  | <i>Stationary-phase sigma factor <math>\sigma^S</math>, transcriptional activator of the general/starvation-stress response</i>            | (59, 81) | S | F |
|                                    | <i>treR</i>  | DNA-binding transcriptional repressor                                                                                                      | (82)     | W |   |
|                                    | <i>uvrY</i>  | Cognate response regulator of BarA-UvrY two-component regulatory system                                                                    | (83)     | W |   |
|                                    |              |                                                                                                                                            |          |   |   |
| Chaperones and proteases           |              |                                                                                                                                            |          |   |   |
|                                    | <i>cspC</i>  | Binds RNA and ssDNA                                                                                                                        | (84)     | W |   |
|                                    | <i>groES</i> | Molecular chaperone                                                                                                                        | (54)     | S | F |
|                                    | <i>hfq</i>   | Binds RNA; involved in post-transcriptional regulation                                                                                     | (85)     | S |   |
|                                    | <i>ldcA</i>  | LD carboxypeptidase A; recycling of peptidoglycan A                                                                                        | (52)     | S |   |
|                                    | <i>lon</i>   | DNA binding ATP-dependent protease                                                                                                         | (86)     | S |   |
|                                    | <i>pepP</i>  | Proline aminopeptidase II                                                                                                                  | (87)     | W |   |
|                                    | <i>prc</i>   | Carboxy-terminal protease for penicillin-binding protein                                                                                   | (88)     | W |   |
|                                    |              |                                                                                                                                            |          |   |   |
| DNA replication and repair-related |              |                                                                                                                                            |          |   |   |
|                                    | <i>dinB</i>  | DNA polymerase IV                                                                                                                          | (60)     | M | N |
|                                    | <i>ligA</i>  | DNA ligase                                                                                                                                 | (89)     | W |   |
|                                    | <i>polB</i>  | DNA polymerase II                                                                                                                          | (35)     |   | N |
|                                    | <i>recA</i>  | <i>Recombination and SOS-response activation</i>                                                                                           | (32, 90) | S | F |
|                                    | <i>recB</i>  | <i>Exonuclease V- RecBCD complex, DNA double-strand end (DSE)-repair recombination and SOS response activation by DSEs</i>                 | (90)     | S | F |
|                                    | <i>recC</i>  | <i>Exonuclease V- RecBCD complex, DSE-repair recombination and SOS response activation by DSEs</i>                                         | (90)     |   | F |
|                                    | <i>recF</i>  | ssDNA and dsDNA binding recombinational repair protein                                                                                     | (56, 57) | M | N |
|                                    | <i>ruvA</i>  | Branch migration of Holliday junctions                                                                                                     | (34, 58) | S | N |
|                                    | <i>ruvB</i>  | Branch migration of Holliday junctions                                                                                                     | (34, 58) | S | N |



|                    |                         |                                                                                           |            |   |   |
|--------------------|-------------------------|-------------------------------------------------------------------------------------------|------------|---|---|
|                    | <i>ruvC</i>             | Holiday junction endonuclease                                                             | (34, 58)   | S | N |
|                    | <i>sulA</i>             | Cell division inhibition during SOS response                                              | (56)       | W | F |
|                    | <i>umuC</i><br><i>D</i> | DNA polymerase V                                                                          | (2, 63)    | W | N |
|                    |                         |                                                                                           |            |   |   |
| Electron transfer  |                         |                                                                                           |            |   |   |
|                    | <i>cyoA</i>             | Cytochrome bo' terminal oxidase subunit I                                                 | (91)       | M |   |
|                    | <i>cyoD</i>             | Cytochrome bo' terminal oxidase subunit IV                                                | (92)       | M |   |
|                    | <i>fre</i>              | NAD(P)H:flavin oxidoreductase                                                             | (93)       | W |   |
|                    | <i>hemL</i>             | glutamate-1-semialdehyde aminotransferase; biosynthesis of hemes                          | (94)       | S |   |
|                    | <i>hscB</i>             | Co-chaperone of HscA ATPase; involved in biogenesis of Fe-S cluster                       | (95, 96)   | M |   |
|                    | <i>mdh</i>              | <i>Malate dehydrogenase; transfer of NADH to NADH:ubiquinone oxidoreductase</i>           | (97, 98)   | M |   |
|                    | <i>nuoC</i>             | NADH ubiquinone oxidoreductase subunit C; belongs to connecting fragment                  | (17, 99)   | S |   |
|                    | <i>nuoG</i>             | NADH ubiquinone oxidoreductase subunit G; belongs to water-soluble dehydrogenase fragment | (17, 99)   | S |   |
|                    | <i>nuoH</i>             | NADH ubiquinone oxidoreductase subunit H; belongs to membrane fragment                    | (17, 99)   | S |   |
|                    | <i>nuoJ</i>             | NADH ubiquinone oxidoreductase subunit J; belongs to membrane fragment                    | (17, 99)   | S |   |
|                    | <i>nuoK</i>             | NADH ubiquinone oxidoreductase subunit K; belongs to membrane fragment                    | (17, 99)   | M |   |
|                    | <i>nuoL</i>             | NADH ubiquinone oxidoreductase subunit L; belongs to membrane fragment                    | (17, 99)   | S |   |
|                    | <i>pgi</i>              | Phosphoglucose isomerase                                                                  | (100)      | M |   |
|                    | <i>sdhB</i>             | Subunit B of succinate ubiquinone oxidoreductase                                          | (101)      | M |   |
|                    | <i>sdhD</i>             | Subunit D of succinate ubiquinone oxidoreductase                                          | (101)      | M |   |
|                    | <i>ubiA</i>             | 4-Hydroxybenzoate octaprenyltransferase; <i>ubiquinone biosynthesis</i>                   | (18)       | S |   |
|                    | <i>ubiD</i>             | Decarboxylase; ubiquinone biosynthesis                                                    | (18)       | M |   |
|                    | <i>ubiE</i>             | Methyltransferase; ubiquinone biosynthesis                                                | (18)       | S |   |
|                    | <i>ubiH</i>             | 2-octaprenyl-6-methoxyphenol hydroxylase; ubiquinone biosynthesis                         | (18)       | S |   |
|                    | <i>ubiX</i>             | Decarboxylase; ubiquinone biosynthesis                                                    | (102)      | W |   |
|                    |                         |                                                                                           |            |   |   |
| Metabolism         |                         |                                                                                           |            |   |   |
|                    | <i>apaH</i>             | Diadenosine tetraphosphatase                                                              | (103)      | M |   |
|                    | <i>cysD</i>             | ATP sulfurlyase                                                                           | (104)      | M |   |
|                    | <i>argD</i>             | Arginine biosynthesis                                                                     | (105)      | W |   |
|                    | <i>lipB</i>             | Lipoyl-protein ligase; lipoate biosynthesis                                               | (106, 107) | M |   |
|                    | <i>pgl</i>              | 6-phosphogluconolactonase                                                                 | (108)      | M |   |
|                    | <i>rbsK</i>             | Ribokinase                                                                                | (109)      | S |   |
|                    | <i>speD</i>             | S-adenosylmethionine decarboxylase; polyamine biosynthesis                                | (110)      | M |   |
|                    | <i>speE</i>             | Spermidine synthase; polyamine biosynthesis                                               | (110)      | M |   |
| Cellular processes |                         |                                                                                           |            |   |   |
|                    | <i>acrA</i>             | Multidrug efflux system                                                                   | (111)      | W |   |

|                  |             |                                                                                             |            |   |  |
|------------------|-------------|---------------------------------------------------------------------------------------------|------------|---|--|
|                  | <i>acrB</i> | Multidrug-efflux system                                                                     | (111)      | W |  |
|                  | <i>dsbA</i> | Periplasmic disulfide-introducing catalyst                                                  | (112)      | S |  |
|                  | <i>dsbC</i> | Periplasmic protein disulfide isomerase                                                     | (113)      | M |  |
|                  | <i>proL</i> | Proline tRNA                                                                                | (114)      | M |  |
|                  | <i>pstB</i> | ATP-binding component of the phosphate ABC transporter                                      | (115)      | W |  |
|                  | <i>pstC</i> | ATP-binding component of the phosphate ABC transporter                                      | (115)      | M |  |
|                  | <i>rppH</i> | RNA pyrophosphohydrolase                                                                    | (116)      | S |  |
|                  | <i>srlA</i> | Subunit of glucitol/sorbitol phosphotransferase system                                      | (117)      | W |  |
|                  | <i>tatC</i> | Subunit of the twin-arginine translocation complex                                          | (118)      | M |  |
|                  | <i>trxB</i> | Thioredoxin reductase                                                                       | (119)      | W |  |
|                  | <i>znuA</i> | Periplasmic zinc-binding component of the zinc transporter                                  | (120)      | M |  |
|                  | <i>znuC</i> | ATPase subunit of the zinc transporter                                                      | (120)      | W |  |
| Unknown function |             |                                                                                             |            |   |  |
|                  | <i>apaG</i> | Unknown protein, gene mutation is polar on <i>apaH</i>                                      | (121)      | W |  |
|                  | <i>ybjT</i> | Conserved protein with NAD(P)-binding Rossmann-fold domain                                  | (122)      | W |  |
|                  | <i>yflL</i> | Predicted CP4-57 cryptic prophage protein                                                   | (122)      | W |  |
|                  | <i>ygfA</i> | Putative 5-formyl-tetrahydrofolate cyclo-ligase; highly conserved from prokaryotes to human | (122)      | M |  |
|                  | <i>yhhK</i> | Predicted acetyl transferase predicted to be involved in pantothenate metabolism            | (123)      | M |  |
|                  | <i>yjcC</i> | Predicted signal-transduction protein                                                       | (122)      | W |  |
|                  | <i>yjcC</i> | Conserved protein                                                                           | (122)      | W |  |
|                  | <i>yifE</i> | Conserved protein                                                                           | (122)      | S |  |
|                  | <i>yigP</i> | Conserved protein                                                                           | (122)      | M |  |
|                  | <i>yqgE</i> | Predicted protein                                                                           | (122)      | W |  |
|                  | <i>yqiC</i> | Conserved protein, Salmonella homologue a membrane protein                                  | (122, 124) | M |  |
|                  | <i>ytiB</i> | A membrane protein with a unique signal sequence                                            | (125)      | W |  |

<sup>1</sup>Weak (W), moderate (M), and strong (S), SIM defect strengths are defined in Table S3 as 1.5-3- (W), 3.1-9- (M), and >9-fold (S) stress-induced mutation rate defects caused by the mutations in these genes.

**Table S3. Stress-induced mutation rates of previously unpublished SIM network mutants in quantitative assay**

Mutation rates are the change in mutant frequencies between days 3 and 5 for three to four independent cultures [Quantitative SIM assay, Methods, per (59)], and are grouped by strength of phenotype: weak (W, 1.5-3-fold), moderate (M, 3.1-9-fold), and strong (S, >9-fold) mutagenesis defects, compared with the WT control. Fold decrease in mutation rate is the mutation rate of the WT (control) divided by the rate from the mutant assayed in parallel then averaged for 3 independent experiments. *P* values are for differences from the WT control strain per Methods.

| Strain   | Mutant gene | Mutation rate (Lac <sup>+</sup> cfu per 10 <sup>8</sup> cells per day) |       |       | Fold decrease in mutation rate of mutants (WT/mutant) ± SEM |       |       | Mean fold decrease in mutation rate of mutants (WT/mutant) ± SEM | <i>P</i> value | SIM defect strength |
|----------|-------------|------------------------------------------------------------------------|-------|-------|-------------------------------------------------------------|-------|-------|------------------------------------------------------------------|----------------|---------------------|
|          |             | Exp 1                                                                  | Exp 2 | Exp 3 | Exp 1                                                       | Exp 2 | Exp 3 |                                                                  |                |                     |
| SMR4562  | WT          | 32.5                                                                   | 33    | 37.5  |                                                             |       |       |                                                                  |                |                     |
| SMR12233 | <i>srlA</i> | 22.3                                                                   | 23.6  | 24.2  | 1.5                                                         | 1.4   | 1.5   | 1.5 ± 0.04                                                       | 0.003          | W                   |
| SMR4562  | WT          | *32.5                                                                  | 34.5  | *37.5 |                                                             |       |       |                                                                  |                | W                   |
| SMR12221 | <i>ybjT</i> | 25.2                                                                   | 24.6  | 19.6  | 1.3                                                         | 1.4   | 1.9   | 1.5 ± 0.2                                                        | 0.007          | W                   |
| SMR4562  | WT          | 37                                                                     | *33   | 28    |                                                             |       |       |                                                                  |                | W                   |
| SMR12001 | <i>treR</i> | 21.4                                                                   | 26.4  | 17.2  | 1.7                                                         | 1.3   | 1.6   | 1.5 ± 0.1                                                        | 0.042          | W                   |
| SMR4562  | WT          | *32.5                                                                  | *34.5 | 31.2  |                                                             |       |       |                                                                  |                | W                   |
| SMR12056 | <i>yjcC</i> | 19.7                                                                   | 23.6  | 20.6  | 1.6                                                         | 1.5   | 1.5   | 1.5 ± 0.06                                                       | 0.002          | W                   |
| SMR4562  | WT          | *32.5                                                                  | 33.5  | 30    |                                                             |       |       |                                                                  |                | W                   |
| SMR11978 | <i>yicC</i> | 24.9                                                                   | 23.2  | 17.6  | 1.3                                                         | 1.4   | 1.7   | 1.5 ± 0.1                                                        | 0.014          | W                   |
| SMR4562  | WT          | 33.2                                                                   | 29.9  | 39    |                                                             |       |       |                                                                  |                | W                   |
| SMR11981 | <i>ytjB</i> | 21.7                                                                   | 19.8  | 21.7  | 1.5                                                         | 1.5   | 1.8   | 1.6 ± 0.1                                                        | 0.009          | W                   |
| SMR4562  | WT          | 37.3                                                                   | *33.5 | 35.7  |                                                             |       |       |                                                                  |                | W                   |
| SMR12023 | <i>arcA</i> | 23                                                                     | 21.4  | 18.5  | 1.6                                                         | 1.6   | 1.9   | 1.7 ± 0.1                                                        | 0.001          | W                   |
| SMR4562  | WT          | 29.3                                                                   | 30.1  | 34.2  |                                                             |       |       |                                                                  |                | W                   |
| SMR11973 | <i>ligA</i> | 18.4                                                                   | 17    | 18.8  | 1.6                                                         | 1.8   | 1.8   | 1.7 ± 0.07                                                       | 0.001          | W                   |
| SMR12050 | <i>yqgE</i> | 18.7                                                                   | 17.9  | 19.3  | 1.6                                                         | 1.7   | 1.8   | 1.7 ± 0.06                                                       | 0.001          | W                   |
| SMR4562  | WT          | *37.3                                                                  | *33   | *28   |                                                             |       |       |                                                                  |                | W                   |
| SMR12005 | <i>argD</i> | 24.6                                                                   | 20.9  | 12.6  | 1.5                                                         | 1.6   | 2.2   | 1.8 ± 0.2                                                        | 0.04           | W                   |
| SMR4562  | WT          | *32.5                                                                  | 29.8  | 35.2  |                                                             |       |       |                                                                  |                | W                   |
| SMR12241 | <i>apaG</i> | 16.7                                                                   | 18.4  | 20.6  | 1.9                                                         | 1.6   | 1.7   | 1.8 ± 0.1                                                        | 0.002          | W                   |
| SMR4562  | WT          | *29.3                                                                  | *30.1 | *34.2 |                                                             |       |       |                                                                  |                | W                   |
| SMR11979 | <i>yjlL</i> | 16.8                                                                   | 17.2  | 18    | 1.7                                                         | 1.8   | 1.9   | 1.8 ± 0.05                                                       | 0.001          | W                   |
| SMR4562  | WT          | *37                                                                    | 30.6  | 36.1  |                                                             |       |       |                                                                  |                | W                   |
| SMR11984 | <i>acrB</i> | 22.6                                                                   | 17.5  | 17.8  | 1.6                                                         | 1.7   | 2     | 1.8 ± 0.1                                                        | 0.004          | W                   |
| SMR4562  | WT          | *28.5                                                                  | 36    | *37.5 |                                                             |       |       |                                                                  |                | W                   |
| SMR11992 | <i>mall</i> | 17.9                                                                   | 17.4  | 15.7  | 1.6                                                         | 2.1   | 2.4   | 2.0 ± 0.2                                                        | 0.004          | W                   |
| SMR4562  | WT          | 44.6                                                                   | 143   | 139   |                                                             |       |       |                                                                  |                | W                   |
| PJH1276  | <i>lrp</i>  | 26                                                                     | 96    | 51    | 1.7                                                         | 1.5   | 2.7   | 2.0 ± 0.4                                                        | 0.25           | W                   |
| SMR4562  | WT          | *34.5                                                                  | *34.2 | *31.2 |                                                             |       |       |                                                                  |                | W                   |
| SMR12220 | <i>acrA</i> | 26.3                                                                   | 8.8   | 17.4  | 1.3                                                         | 3.9   | 1.8   | 2.3 ± 0.8                                                        | 0.038          | W                   |
| SMR4562  | WT          | *28.5                                                                  | *30   | 35.2  |                                                             |       |       |                                                                  |                | W                   |
| SMR12314 | <i>uvrY</i> | 9.31                                                                   | 20.7  | 13.9  | 3.1                                                         | 1.4   | 2.5   | 2.3 ± 0.5                                                        | 0.013          | W                   |

|                       |             |       |       |       |     |     |     |           |                      |   |
|-----------------------|-------------|-------|-------|-------|-----|-----|-----|-----------|----------------------|---|
| SMR4562               | WT          | *28.5 | *29.8 | *35.2 |     |     |     |           |                      | W |
| SMR11969              | <i>trxB</i> | 9.74  | 14.8  | 13.7  | 2.9 | 2   | 2.6 | 2.5 ± 0.3 | 0.002                | W |
| SMR4562               | WT          | 30.9  | 34.4  | 35.5  |     |     |     |           |                      | W |
| SMR12007              | <i>fre</i>  | 13.9  | 14.1  | 12.9  | 2.2 | 2.4 | 2.7 | 2.5 ± 0.2 | 0.0002               | W |
| SMR4562               | WT          | *29.3 | *30.1 | *34.2 |     |     |     |           |                      | W |
| SMR12148              | <i>cspC</i> | 12.5  | 11.9  | 11.3  | 2.3 | 2.5 | 3   | 2.6 ± 0.2 | 0.0002               | W |
| SMR4562               | WT          | *37.3 | *35.2 | *30   |     |     |     |           |                      | W |
| SMR12253              | <i>barA</i> | 9.4   | 17.8  | 16.3  | 4   | 2   | 1.8 | 2.6 ± 0.7 | 0.004                | W |
| SMR4562               | WT          | *37.3 | *33   | *37.5 |     |     |     |           |                      | W |
| SMR12251              | <i>prc</i>  | 10.5  | 11.8  | 22.5  | 3.6 | 2.8 | 1.7 | 2.7 ± 0.5 | 0.007                | W |
| SMR4562               | WT          | 26.9  | 32.6  | *36.1 |     |     |     |           |                      | W |
| SMR11970              | <i>pepP</i> | 10    | 14.5  | 11.7  | 2.7 | 2.2 | 3.1 | 2.7 ± 0.2 | 0.003                | W |
| SMR4562               | WT          | *32.5 | *33.5 | *35.2 |     |     |     |           |                      | W |
| SMR12232              | <i>pstB</i> | 7.15  | 17.1  | 20    | 4.5 | 2   | 1.8 | 2.8 ± 0.9 | 0.009                | W |
| SMR4562               | WT          | *37   | 28.3  | *28   |     |     |     |           |                      | W |
| SMR11967              | <i>ubiX</i> | 11.9  | 13.9  | 8.8   | 3.1 | 2   | 3.2 | 2.8 ± 0.4 | 0.004                | W |
| SMR4562               | WT          | *28.5 | *31.2 | *36   |     |     |     |           |                      | W |
| SMR12211              | <i>znuC</i> | 6.9   | 13.4  | 15.3  | 4.1 | 2.3 | 2.4 | 2.9 ± 0.6 | 0.004                | W |
| SMR4562               | WT          | 18    | 24.7  | 22.5  |     |     |     |           |                      | M |
| SMR17290              | <i>crp</i>  | 5.1   | 8     | 8.8   | 3.5 | 3.1 | 2.6 | 3.1 ± 0.3 | 0.003                | M |
| SMR4562               | WT          | 29    | *28.3 | *35.2 |     |     |     |           |                      | M |
| SMR12313              | <i>ubiD</i> | 6.9   | 11.1  | 14.6  | 4.2 | 2.5 | 2.4 | 3.1 ± 0.6 | 0.003                | M |
| SMR4562 <sup>1</sup>  | WT          | 38.7  | 56    | 65    |     |     |     |           |                      | M |
| SMR12134 <sup>1</sup> | <i>yhhK</i> | 10.8  | 16    | 25    | 3.6 | 3.5 | 2.6 | 3.2 ± 0.3 | 0.025                | M |
| SMR4562               | WT          | 37    | 29.8  | 27.9  |     |     |     |           |                      | M |
| SMR11997              | <i>metJ</i> | 8.3   | 12.8  | 9.1   | 4.4 | 2.3 | 3.1 | 3.3 ± 0.6 | 0.002                | M |
| SMR4562               | WT          | *37   | *28.5 | *30.6 |     |     |     |           |                      | M |
| SMR13473              | <i>phoU</i> | 9.9   | 8.8   | 9.1   | 3.7 | 3.2 | 3.4 | 3.5 ± 0.2 | 0.011                | M |
| SMR4562               | WT          | *29.3 | *30.1 | *34.2 |     |     |     |           |                      | M |
| SMR12219              | <i>lipB</i> | 8.9   | 7.3   | 9.4   | 3.3 | 4.1 | 3.7 | 3.7 ± 0.2 | 0.0002               | M |
| SMR4562               | WT          | 30.87 | 34.4  | 35.45 |     |     |     |           |                      | M |
| SMR11983              | <i>proL</i> | 8.6   | 9.3   | 8.5   | 3.6 | 3.7 | 4.1 | 3.8 ± 0.2 | 6 × 10 <sup>-5</sup> | M |
| SMR4562               | WT          | *30.9 | *36   | 27.1  |     |     |     |           |                      | M |
| SMR11962              | <i>speD</i> | 9.6   | 10.1  | 5.5   | 3.2 | 3.6 | 4.9 | 3.9 ± 0.5 | 0.001                | M |
| SMR4562               | WT          | *37.3 | *28.3 | 28.1  |     |     |     |           |                      | M |
| SMR12302              | <i>cysD</i> | 4.86  | 15.9  | 13.4  | 7.7 | 1.8 | 2.1 | 3.9 ± 1.9 | 0.012                | M |
| SMR4562               | WT          | 42.4  | 32.4  | *37.3 |     |     |     |           |                      | M |
| SMR12252              | <i>sdhD</i> | 5.7   | 16.5  | 11.2  | 7.4 | 2   | 3.3 | 4.2 ± 1.6 | 0.003                | M |
| SMR4562               | WT          | *30.9 | *34.4 | *35.5 |     |     |     |           |                      | M |
| SMR12240              | <i>speE</i> | 6.8   | 10.5  | 7.3   | 4.6 | 3.3 | 4.8 | 4.2 ± 0.5 | 0.0002               | M |
| SMR12002              | <i>fruR</i> | 8.9   | 8.4   | 7     | 3.5 | 4.1 | 5.1 | 4.2 ± 0.5 | 7 × 10 <sup>-5</sup> | M |
| SMR11994              | <i>argR</i> | 8     | 7     | 8.8   | 3.9 | 4.9 | 4   | 4.3 ± 0.3 | 7 × 10 <sup>-5</sup> | M |
| SMR4562               | WT          | *33.5 | *28.1 | *36.1 |     |     |     |           |                      | M |
| SMR12257              | <i>pgl</i>  | 7.2   | 8.6   | 7.34  | 4.7 | 3.3 | 4.9 | 4.3 ± 0.5 | 0.0005               | M |
| SMR4562               | WT          | 37.3  | 35.2  | 30    |     |     |     |           |                      | M |
| SMR12236              | <i>znuA</i> | 5     | 9.5   | 11.1  | 7.5 | 3.7 | 2.7 | 4.6 ± 1.4 | 0.0008               | M |
| SMR4562               | WT          | 37    | 30.6  | 36.1  |     |     |     |           |                      | M |
| SMR12071              | <i>pstC</i> | 7.77  | 7.25  | 7.16  | 4.8 | 4.2 | 5   | 4.7 ± 0.2 | 0.005                | M |
| SMR4562               | WT          | *33.4 | 26    | 34    |     |     |     |           |                      | M |
| SMR12069              | <i>dsbC</i> | 6.4   | 7.1   | 5.7   | 5.2 | 3.7 | 6   | 5 ± 0.7   | 0.0007               | M |
| SMR4562               | WT          | 35.7  | *29   | *33.2 |     |     |     |           |                      | M |

|          |             |       |       |       |      |      |      |            |                      |   |
|----------|-------------|-------|-------|-------|------|------|------|------------|----------------------|---|
| SMR12574 | <i>cyoD</i> | 11.8  | 3.28  | 8.5   | 3    | 8.8  | 3.9  | 5.3 ± 1.8  | 0.0014               | M |
| SMR4562  | WT          | *37   | *36   | *27.1 |      |      |      |            |                      | M |
| SMR12307 | <i>hscB</i> | 6     | 7.3   | 6.2   | 6.2  | 4.9  | 4.4  | 5.2 ± 0.5  | 0.012                | M |
| SMR4562  | WT          | *33.2 | *29.9 | *39   |      |      |      |            |                      | M |
| SMR12570 | <i>cyoA</i> | 5.7   | 6.7   | 6.3   | 5.8  | 4.4  | 6.2  | 5.5 ± 0.5  | 0.0005               | M |
| SMR4562  | WT          | *37   | *36   | *37.5 |      |      |      |            |                      | M |
| SMR11990 | <i>apaH</i> | 4.93  | 6.3   | 10.4  | 7.5  | 5.7  | 3.6  | 5.6 ± 1.1  | 6 × 10 <sup>-5</sup> | M |
| SMR4562  | WT          | *30.9 | *34.4 | *35.5 |      |      |      |            |                      | M |
| SMR12216 | <i>yqiC</i> | 6.3   | 4.9   | 6.8   | 4.9  | 7    | 5.2  | 5.7 ± 0.7  | 5 × 10 <sup>-5</sup> | M |
| SMR4562  | WT          | *33.2 | *29.9 | *39   |      |      |      |            |                      | M |
| SMR12332 | <i>sdhB</i> | 6.1   | 6.2   | 5.6   | 5.5  | 4.8  | 7    | 5.7 ± 0.6  | 0.0005               | M |
| SMR4562  | WT          | *37.3 | *29.8 | *35.2 |      |      |      |            |                      | M |
| SMR12227 | <i>glnK</i> | 3.2   | 14.9  | 8.1   | 11.8 | 2    | 4.3  | 6 ± 3      | 0.003                | M |
| SMR4562  | WT          | *29.8 | *31.2 | *36.1 |      |      |      |            |                      | M |
| SMR12008 | <i>tatC</i> | 12.6  | 3.1   | 5     | 2.4  | 10.1 | 7.2  | 6.5 ± 2.2  | 0.002                | M |
| SMR4562  | WT          | *30.9 | *34.4 | *35.5 |      |      |      |            |                      | M |
| SMR11998 | <i>cyaA</i> | 4.5   | 4.1   | 5.4   | 6.9  | 8.4  | 6.6  | 7.3 ± 0.6  | 4 × 10 <sup>-5</sup> | M |
| SMR4562  | WT          | *42.4 | *32.4 | *37.3 |      |      |      |            |                      | M |
| SMR12060 | <i>mdh</i>  | 3.86  | 6.3   | 5.5   | 11   | 5.1  | 6.8  | 7.6 ± 1.7  | 0.0004               | M |
| SMR4562  | WT          | 38.7  | *29   | *32.6 |      |      |      |            |                      | M |
| SMR11980 | <i>yigP</i> | 7.1   | 3.9   | 3.3   | 5.5  | 7.5  | 9.9  | 7.6 ± 1.3  | 0.004                | M |
| SMR4562  | WT          | *37.3 | *33.5 | *35.2 |      |      |      |            |                      | M |
| SMR12316 | <i>ygfA</i> | 3.14  | 5.9   | 6.4   | 11.9 | 5.7  | 5.5  | 7.7 ± 2.1  | 4 × 10 <sup>-5</sup> | M |
| SMR4562  | WT          | *36   | *37.5 | *36.1 |      |      |      |            |                      | M |
| SMR11995 | <i>pgi</i>  | 6     | 4.4   | 3.74  | 6    | 8.5  | 9.7  | 8.1 ± 1.1  | 3 × 10 <sup>-6</sup> | M |
| SMR4562  | WT          | *38.7 | *29   | *32.6 |      |      |      |            |                      | M |
| SMR13653 | <i>nuoK</i> | 4.7   | 3.3   | 3.6   | 8.2  | 8.8  | 9    | 8.7 ± 0.2  | 0.0005               | M |
| SMR4562  | WT          | *37.3 | *36   | *27.1 |      |      |      |            |                      | M |
| SMR12235 | <i>hdfR</i> | 2.45  | 6.9   | 3.8   | 15.2 | 5.2  | 7.1  | 9.2 ± 3.1  | 0.001                | S |
| SMR4562  | WT          | *33.2 | *29.9 | *39   |      |      |      |            |                      | S |
| SMR11982 | <i>hemL</i> | 2.7   | 3.8   | 4.3   | 12.2 | 7.9  | 9    | 9.7 ± 1.3  | 0.0004               | S |
| SMR4562  | WT          | *29.3 | *30.1 | *34.2 |      |      |      |            |                      | S |
| SMR12584 | <i>rbsK</i> | 2.7   | 3.2   | 3.4   | 11   | 9.3  | 10.1 | 10.1 ± 0.5 | 5 × 10 <sup>-5</sup> | S |
| SMR4562  | WT          | *38.7 | *29   | *32.6 |      |      |      |            |                      | S |
| SMR13640 | <i>nuoG</i> | 4     | 2.8   | 3.1   | 9.8  | 10.3 | 10.4 | 10.2 ± 0.2 | 0.0004               | S |
| SMR4562  | WT          | *37   | *30.6 | *36.1 |      |      |      |            |                      | S |
| SMR11964 | <i>ldcA</i> | 2.35  | 4.4   | 4.3   | 15.8 | 7    | 8.5  | 10.4 ± 2.7 | 0.0001               | S |
| SMR4562  | WT          | *30.9 | *34.4 | *35.5 |      |      |      |            |                      | S |
| SMR11966 | <i>nagC</i> | 3.2   | 2.5   | 3.8   | 9.6  | 13.8 | 9.5  | 11 ± 1.4   | 3 × 10 <sup>-5</sup> | S |
| SMR12254 | <i>lon</i>  | 3.5   | 2.5   | 3.1   | 8.9  | 13.7 | 11.5 | 11.4 ± 1.4 | 3 × 10 <sup>-5</sup> | S |
| SMR4562  | WT          | 18.8  | 16.9  | 29.2  |      |      |      |            |                      | S |
| SMR5236  | <i>rpoE</i> | 2.8   | 1.6   | 1.7   | 6.7  | 10.6 | 17.2 | 11.5 ± 3   | 0.007                | S |
| SMR4562  | WT          | *33.4 | *26   | *34   |      |      |      |            |                      | S |
| SMR12210 | <i>rppH</i> | 3.3   | 2.7   | 2.2   | 10.1 | 9.5  | 15.5 | 11.7 ± 1.9 | 0.0004               | S |
| SMR12238 | <i>yifE</i> | 3.6   | 2     | 2.4   | 9.3  | 13.2 | 13.9 | 12.1 ± 1.4 | 0.0004               | S |
| SMR4562  | WT          | *33.2 | *29.9 | *39   |      |      |      |            |                      | S |
| SMR13654 | <i>nuoH</i> | 2.7   | 3.3   | 2.4   | 12.3 | 9    | 16.4 | 12.5 ± 2.1 | 0.0003               | S |
| SMR4562  | WT          | *28.3 | *35.2 | *30.6 |      |      |      |            |                      | S |
| SMR12309 | <i>dsbA</i> | 1.8   | 3.7   | 2.2   | 15.7 | 9.6  | 13.8 | 13 ± 1.8   | 0.0002               | S |
| SMR4562  | WT          | 40.2  | *30.6 | *36.1 |      |      |      |            |                      | S |
| SMR12260 | <i>ubiH</i> | 3     | 2.3   | 2.6   | 13.4 | 13.4 | 14.1 | 13.6 ± 0.2 | 0.0003               | S |

|          |             |       |       |       |      |      |      |            |                      |   |
|----------|-------------|-------|-------|-------|------|------|------|------------|----------------------|---|
| SMR4562  | WT          | *28.3 | *27.1 | *36.1 |      |      |      |            |                      | S |
| SMR12239 | <i>nuoL</i> | 2.9   | 1.4   | 2.4   | 9.8  | 19.4 | 15.1 | 14.7 ± 2.8 | 0.0006               | S |
| SMR4562  | WT          | *29.3 | *28.3 | 34.1  |      |      |      |            |                      | S |
| SMR12223 | <i>nuoC</i> | 1.9   | 1.8   | 2     | 15.5 | 15.7 | 17.1 | 16 ± 0.5   | 0.0001               | S |
| SMR4562  | WT          | *38.7 | *29   | *32.6 |      |      |      |            |                      | S |
| SMR13652 | <i>nuoJ</i> | 2.5   | 1.8   | 2     | 15.5 | 16.5 | 16.1 | 16 ± 0.3   | 0.0004               | S |
| SMR12261 | <i>hfq</i>  | 3     | 1.8   | 1.6   | 13.1 | 16.1 | 20   | 16.4 ± 2   | 0.0004               | S |
| SMR4562  | WT          | *28.3 | *33.2 | *36.1 |      |      |      |            |                      | S |
| SMR12242 | <i>ubiE</i> | 1.6   | 1.44  | 2.6   | 17.7 | 23.1 | 14   | 18.2 ± 2.6 | 0.0002               | S |
| SMR4562  | WT          | *29.3 | *30.1 | *34.2 |      |      |      |            |                      | S |
| SMR12311 | <i>ubiA</i> | 0.84  | 1.02  | 1.23  | 34.7 | 29.4 | 27.9 | 30.7 ± 2.1 | 4 × 10 <sup>-5</sup> | S |
| SMR4562  | WT          | *33.4 | *26   | *34   |      |      |      |            |                      |   |
| SMR11971 | <i>ihfA</i> | 0.14  | 0.19  | 0.23  | 241  | 137  | 148  | 175 ± 33   | 0.0003               | S |

\* Data indicated are repeats (in the table) from experiments with many different mutants run in parallel with each WT control measurement.

<sup>1</sup> The mutant and control WT were grown in LBH liquid medium due to growth defect of the *yhhK* mutant in liquid M9 medium and the mutation rates were determined as per Methods.

**Table S4. *Escherichia coli* strains and plasmid used**(P) indicates a transposon insertion in the promoter region. CGSC, *E. coli* Genetic Stock Center (Yale).

| Strain   | Relevant genotype*                                                | Reference and/or source |
|----------|-------------------------------------------------------------------|-------------------------|
| CAG45114 | MG1655 $\lambda$ . <i>rpoHP3-lacZ</i>                             | (20)                    |
| FC29     | $\Delta(lac-proB)_{XIII} ara thi [F' \Delta(lacI Z) proAB^+]$     | (32)                    |
| FC36     | $\Delta(lac-proB)_{XIII} ara thi Rif^R$                           | (32)                    |
| FC40     | FC36 [F' <i>lacI33<math>\Omega</math>lacZ proAB<sup>+</sup></i> ] | (32)                    |
| JW0048   | BW25113 $\Delta apaH761::FRT$ KanFRT                              | CGSC (33)               |
| JW0049   | BW25113 $\Delta apaG762::FRT$ KanFRT                              | "                       |
| JW0078   | BW25113 $\Delta fruR786::FRT$ KanFRT                              | "                       |
| JW0116   | BW25113 $\Delta speD738::FRT$ KanFRT                              | "                       |
| JW0117   | BW25113 $\Delta speE739::FRT$ KanFRT                              | "                       |
| JW0419   | BW25113 $\Delta cyoD786::FRT$ KanFRT                              | "                       |
| JW0422   | BW25113 $\Delta cyoA789::FRT$ KanFRT                              | "                       |
| JW0429   | BW25113 $\Delta lon725::FRT$ KanFRT                               | "                       |
| JW0440   | BW25113 $\Delta glnK736::FRT$ KanFRT                              | "                       |
| JW0451   | BW25113 $\Delta acrB747::FRT$ KanFRT                              | "                       |
| JW0452   | BW25113 $\Delta acrA748::FRT$ KanFRT                              | "                       |
| JW0662   | BW25113 $\Delta nagC725::FRT$ KanFRT                              | "                       |
| JW0712   | BW25113 $\Delta sdhD772::FRT$ KanFRT                              | "                       |
| JW0714   | BW25113 $\Delta sdhB774::FRT$ KanFRT                              | "                       |
| JW0750   | BW25113 $\Delta pgI739::FRT$ KanFRT                               | "                       |
| JW0871   | BW25113 $\Delta trxB786::FRT$ KanFRT                              | "                       |
| JW0872   | BW25113 $\Delta lrp787::FRT$ KanFRT                               | "                       |
| JW1181   | BW25113 $\Delta ldcA782::FRT$ KanFRT                              | "                       |
| JW1612   | BW25113 $\Delta mall768::FRT$ KanFRT                              | "                       |
| JW1702   | BW25113 $\Delta ihfA786::FRT$ KanFRT                              | "                       |
| JW1812   | BW25113 $\Delta cspC747::FRT$ KanFRT                              | "                       |
| JW1819   | BW25113 $\Delta prc755::FRT$ KanFRT                               | "                       |
| JW1847   | BW25113 $\Delta znuC783::FRT$ KanFRT                              | "                       |
| JW1852   | BW25113 $\Delta ruvC789::FRT$ KanFRT                              | "                       |
| JW1899   | BW25113 $\Delta uvrY760::FRT$ KanFRT                              | "                       |
| JW2273   | BW25113 $\Delta nuoL760::FRT$ KanFRT                              | "                       |
| JW2274   | BW25113 $\Delta nuoK761::FRT$ KanFRT                              | "                       |
| JW2275   | BW25113 $\Delta nuoJ762::FRT$ KanFRT                              | "                       |
| JW2277   | BW25113 $\Delta nuoH764::FRT$ KanFRT                              | "                       |
| JW2308   | BW25113 $\Delta ubiX732::FRT$ KanFRT                              | "                       |
| JW2511   | BW25113 $\Delta hscB773::FRT$ KanFRT                              | "                       |
| JW2556   | BW25113 $\Delta rseA::FRT$ KanFRT                                 | (33)                    |
| JW2757   | BW25113 $\Delta barA784::FRT$ KanFRT                              | CGSC (33)               |
| JW2788   | BW25113 $\Delta recB745::FRT$ KanFRT                              | "                       |
| JW2798   | BW25113 $\Delta rppH754::FRT$ KanFRT                              | "                       |
| JW2861   | BW25113 $\Delta dsbC744::FRT$ KanFRT                              | "                       |
| JW2875   | BW25113 $\Delta ubiH758::FRT$ KanFRT                              | "                       |
| JW2876   | BW25113 $\Delta pepP759::FRT$ KanFRT                              | "                       |
| JW2879   | BW25113 $\Delta ygfA763::FRT$ KanFRT                              | "                       |
| JW2915   | BW25113 $\Delta yqgE723::FRT$ KanFRT                              | "                       |
| JW3205   | BW25113 $\Delta mdh761::FRT$ KanFRT                               | "                       |
| JW3206   | BW25113 $\Delta argR762::FRT$ KanFRT                              | "                       |
| JW3320   | BW25113 $\Delta crp765::FRT$ KanFRT                               | "                       |
| JW3322   | BW25113 $\Delta argD767::FRT$ KanFRT                              | "                       |
| JW3619   | BW25113 $\Delta yicC750::FRT$ KanFRT                              | "                       |
| JW3702   | BW25113 $\Delta phoU755::FRT$ KanFRT                              | "                       |
| JW3703   | BW25113 $\Delta pstB756::FRT$ KanFRT                              | "                       |
| JW3705   | BW25113 $\Delta pstC758::FRT$ KanFRT                              | "                       |

|          |                                                                                                                    |                        |
|----------|--------------------------------------------------------------------------------------------------------------------|------------------------|
| JW3731   | BW25113 $\Delta$ rbsK781::FRTKanFRT                                                                                | "                      |
| JW3737   | BW25113 $\Delta$ yifE786::FRTKanFRT                                                                                | "                      |
| JW3778   | BW25113 $\Delta$ cyaA751::FRTKanFRT                                                                                | "                      |
| JW3815   | BW25113 $\Delta$ tatC781::FRTKanFRT                                                                                | "                      |
| JW3820   | BW25113 $\Delta$ fre784::FRTKanFRT                                                                                 | "                      |
| JW3832   | BW25113 $\Delta$ dsbA723::FRTKanFRT                                                                                | "                      |
| JW3909   | BW25113 $\Delta$ metJ725::FRTKanFRT                                                                                | "                      |
| JW3985   | BW25113 $\Delta$ pgi721::FRTKanFRT                                                                                 | "                      |
| JW4022   | BW25113 $\Delta$ yjcC755::FRTKanFRT                                                                                | "                      |
| JW4130   | BW25113 $\Delta$ hfq722::FRTKanFRT                                                                                 | "                      |
| JW4200   | BW25113 $\Delta$ treR788::FRTKanFRT                                                                                | "                      |
| JW4364   | BW25113 $\Delta$ arcA726::FRTKanFRT                                                                                | "                      |
| JW5089   | BW25113 $\Delta$ lipB769::FRTKanFRT                                                                                | "                      |
| JW5116   | BW25113 $\Delta$ ybjT770::FRTKanFRT                                                                                | "                      |
| JW5375   | BW25113 $\Delta$ nuoC768::FRTKanFRT                                                                                | "                      |
| JW5429   | BW25113 $\Delta$ srlA777::FRTKanFRT                                                                                | "                      |
| JW5437   | BW25113 $\Delta$ rpoS746::FRTKanFRT                                                                                | "                      |
| JW5505   | BW25113 $\Delta$ yqiC737::FRTKanFRT                                                                                | "                      |
| JW5536   | BW25113 $\Delta$ arcB738::FRTKanFRT                                                                                | "                      |
| JW5581   | BW25113 $\Delta$ ubiE778::FRTKanFRT                                                                                | "                      |
| JW5607   | BW25113 $\Delta$ hdfR785::FRTKanFRT                                                                                | "                      |
| JW5831   | BW25113 $\Delta$ znuA782::FRTKanFRT                                                                                | "                      |
| MG22     | <i>galK::P<sub>lac</sub>cfp</i> Amp                                                                                | (16)                   |
| MG1655   | <i>rph-1</i> $\lambda$ F <sup>-</sup>                                                                              | (126)                  |
| MV1161   | <i>supE44</i>                                                                                                      | (127)                  |
| NEC252   | MG1655 <i>yiaG-yfp</i> FRT <i>cat</i> FRT                                                                          | This work              |
| PJH1242  | SMR4562 $\Delta$ lrp787::FRTKanFRT                                                                                 | SMR4562 X P1 (JW0872)  |
| PJH1276  | SMR4562 $\Delta$ lrp787::FRT                                                                                       | PJH1242 X pCP20        |
| RTC0013  | MG1655 $\Delta$ recB::Kan                                                                                          | (6)                    |
| SG12066  | <i>rssB::Tet</i>                                                                                                   | Susan Gottesman (NIH)  |
| SMR593   | FC40 <i>recB21</i>                                                                                                 | (90)                   |
| SMR820   | FC40 <i>lexA3</i> (Ind <sup>-</sup> ) <i>malB::Tn9</i>                                                             | (56)                   |
| SMR1982  | FC40 <i>recG258::Tn10</i> miniKan                                                                                  | (34)                   |
| SMR3525  | FC40 $\Delta$ umuDC:: <i>cat</i>                                                                                   | (56)                   |
| SMR3856  | FC40 Lac <sup>+</sup> day 5 isolate                                                                                | (128)                  |
| SMR3858  | FC40 Lac <sup>+</sup> day 5 isolate                                                                                | (128)                  |
| SMR3859  | FC40 Lac <sup>+</sup> day 5 isolate                                                                                | (128)                  |
| SMR4562  | Independent construction of FC40                                                                                   | (56)                   |
| SMR4610  | FC40 <i>recA::Tn10dCam</i>                                                                                         | SIM down-mutant        |
| SMR5236  | SMR4562 <i>rpoE2072::Tn10dCam</i>                                                                                  | (8)                    |
| SMR5535  | SMR4562 $\Delta$ ( <i>srlR-recA</i> )::Tn10                                                                        | Laboratory collection  |
| SMR5830  | SMR4562 <i>dinB10</i> [F' <i>dinB10</i> ]                                                                          | (60)                   |
| SMR5833  | SMR4562 [pKD46]                                                                                                    | (129)                  |
| SMR5889  | FC36 $\Delta$ dinB50::FRTKanFRT [F' <i>dinB50::FRT</i> ]                                                           | (129)                  |
| SMR6039  | FC40 $\Delta$ att $\lambda$ ::P <sub><i>sulA</i></sub> <i>gfp-mut2</i>                                             | (130)                  |
| SMR6178  | SMR6039 <i>lexA3</i> (Ind <sup>-</sup> ) <i>malB::Tn9</i>                                                          | SMR6039 X P1 (SMR820)  |
| SMR6269  | SMR4562 <i>leu::Tn10</i>                                                                                           | (131)                  |
| SMR6276  | SMR4562 $\Delta$ araBAD567 $\Delta$ att $\lambda$ ::P <sub>BADl</sub> -Scel                                        | (1)                    |
| SMR6308  | SMR6276 [F' <i>codA21::mini-Tn7Kan</i> (I-Scel site )<br><i><math>\Delta</math>tral::dhfR9</i> ]                   | (1)                    |
| SMR6541  | SMR4562 <i>rpoS::Tn10</i>                                                                                          | (59)                   |
| SMR7530  | SMR4562 <i>rssB::Tet</i>                                                                                           | SMR4562 X P1 (SG12066) |
| SMR8097  | SMR4562 $\Delta$ att $\lambda$ ::P <sub><i>sulA</i></sub> <i>gfp-mut2</i> $\Delta$ recF1804::FRTKanFRT             | (132)                  |
| SMR10356 | FC36 <i>rpoS::Tn10</i>                                                                                             | Laboratory collection  |
| SMR10582 | SMR4562 <i>yiaG-yfp</i> FRT <i>cat</i> FRT                                                                         | SMR4562 X P1 (NEC252)  |
| SMR10772 | FC36 $\Delta$ araBAD567                                                                                            | (2)                    |
| SMR10774 | FC36 $\Delta$ araBAD567 $\Delta$ att $\lambda$ ::P <sub>BADl</sub> -Scel                                           | (2)                    |
| SMR10799 | FC36 $\Delta$ araBAD567 $\Delta$ zie3913.1::tetRtetA+1FRT <i>cat</i> FRT<br>$\Delta$ zie3920.5::3ChiKanI Scel site | (2)                    |
| SMR10800 | FC36 $\Delta$ araBAD567 $\Delta$ att $\lambda$ ::P <sub>BADl</sub> -Scel                                           | (2)                    |



|          |                                                                                                                                |                                    |
|----------|--------------------------------------------------------------------------------------------------------------------------------|------------------------------------|
|          | <i>Δzie3913.1::tetRtetA+1FRTcatFRT</i>                                                                                         |                                    |
|          | <i>Δzie3920.5::3ChiKanI Scelsite</i>                                                                                           |                                    |
| SMR11351 | FC36 <i>speD::Tn10dCam</i>                                                                                                     | SIM down-mutation recipient strain |
| SMR11353 | FC36 <i>hfg::Tn10dCam</i>                                                                                                      | "                                  |
| SMR11369 | FC36 <i>ldcA::Tn10dCam</i>                                                                                                     | "                                  |
| SMR11375 | FC36 <i>dsbA::Tn10dCam</i>                                                                                                     | "                                  |
| SMR11379 | FC36 <i>nagC::Tn10dCam</i>                                                                                                     | "                                  |
| SMR11385 | FC36 <i>ubiX::Tn10dCam</i>                                                                                                     | "                                  |
| SMR11387 | FC36 <i>glnK::Tn10dCam</i>                                                                                                     | "                                  |
| SMR11392 | FC36 <i>trxB::Tn10dCam</i>                                                                                                     | "                                  |
| SMR11398 | FC36 <i>pepP::Tn10dCam</i>                                                                                                     | "                                  |
| SMR11404 | FC36 <i>ihfA::Tn10dCam</i>                                                                                                     | "                                  |
| SMR11408 | FC36 <i>prc::Tn10dCam</i>                                                                                                      | "                                  |
| SMR11410 | FC36 <i>arcA(P)::Tn10dCam</i>                                                                                                  | "                                  |
| SMR11412 | FC36 <i>ligA(P)::Tn10dCam</i>                                                                                                  | "                                  |
| SMR11431 | FC36 <i>rppH::Tn10dCam</i>                                                                                                     | "                                  |
| SMR11437 | SMR4562 <i>ΔaraBAD567 Δattλ::P<sub>BADl</sub>-Scel rpoS::Tn10 [F'</i><br><i>codA21::mini-Tn7Kan(l-Scel site ) Δtral::dhfR]</i> | (35)                               |
| SMR11462 | FC36 <i>hdfR::Tn10dCam</i>                                                                                                     | SIM down-mutation recipient strain |
| SMR11463 | FC36 <i>yqiC::Tn10dCam</i>                                                                                                     | "                                  |
| SMR11464 | FC36 <i>yifE::Tn10dCam</i>                                                                                                     | "                                  |
| SMR11465 | FC36 <i>yicC::Tn10dCam</i>                                                                                                     | "                                  |
| SMR11472 | FC36 <i>yfjL(P)::Tn10dCam</i>                                                                                                  | "                                  |
| SMR11475 | FC36 <i>yigP::Tn10dCam</i>                                                                                                     | "                                  |
| SMR11476 | FC36 <i>yfjB(P)::Tn10dCam</i>                                                                                                  | "                                  |
| SMR11478 | FC36 <i>hemL::Tn10dCam</i>                                                                                                     | "                                  |
| SMR11479 | FC36 <i>proL::Tn10dCam</i>                                                                                                     | "                                  |
| SMR11482 | FC36 <i>yhhK::Tn10dCam</i>                                                                                                     | "                                  |
| SMR11522 | FC36 <i>acrB::Tn10dCam</i>                                                                                                     | "                                  |
| SMR11523 | FC36 <i>acrA::Tn10dCam</i>                                                                                                     | "                                  |
| SMR11524 | FC36 <i>barA::Tn10dCam</i>                                                                                                     | "                                  |
| SMR11527 | FC36 <i>uvrY::Tn10dCam</i>                                                                                                     | "                                  |
| SMR11529 | FC36 <i>nuoL::Tn10dCam</i>                                                                                                     | "                                  |
| SMR11530 | FC36 <i>sdhD::Tn10dCam</i>                                                                                                     | "                                  |
| SMR11531 | FC36 <i>apaH::Tn10dCam</i>                                                                                                     | "                                  |
| SMR11532 | FC36 <i>pgl::Tn10dCam</i>                                                                                                      | "                                  |
| SMR11533 | FC36 <i>mall::Tn10dCam</i>                                                                                                     | "                                  |
| SMR11534 | FC36 <i>hscB::Tn10dCam</i>                                                                                                     | "                                  |
| SMR11815 | FC36 <i>argR::Tn10dCam</i>                                                                                                     | "                                  |
| SMR11818 | FC36 <i>pgi::Tn10dCam</i>                                                                                                      | "                                  |
| SMR11820 | FC36 <i>ubiH::Tn10dCam</i>                                                                                                     | "                                  |
| SMR11821 | FC36 <i>metJ::Tn10dCam</i>                                                                                                     | "                                  |
| SMR11822 | FC36 <i>cyaA::Tn10dCam</i>                                                                                                     | "                                  |
| SMR11851 | FC36 <i>nuoH::Tn10dCam</i>                                                                                                     | "                                  |
| SMR11854 | FC36 <i>ybjT::Tn10dCam</i>                                                                                                     | "                                  |
| SMR11865 | FC36 <i>treR::Tn10dCam</i>                                                                                                     | "                                  |
| SMR11872 | FC36 <i>fruR::Tn10dCam</i>                                                                                                     | "                                  |
| SMR11873 | FC36 <i>lipB::Tn10dCam</i>                                                                                                     | "                                  |
| SMR11880 | FC36 <i>znuC::Tn10dCam</i>                                                                                                     | "                                  |
| SMR11881 | FC36 <i>argD::Tn10dCam</i>                                                                                                     | "                                  |
| SMR11883 | FC36 <i>pstB::Tn10dCam</i>                                                                                                     | "                                  |
| SMR11885 | FC36 <i>fre::Tn10dCam</i>                                                                                                      | "                                  |
| SMR11886 | FC36 <i>tatC::Tn10dCam</i>                                                                                                     | "                                  |
| SMR11923 | FC36 <i>ygfA::Tn10dCam</i>                                                                                                     | "                                  |
| SMR11924 | FC36 <i>yjcC::Tn10dCam</i>                                                                                                     | "                                  |
| SMR11925 | FC36 <i>cysD(P)::Tn10dCam</i>                                                                                                  | "                                  |
| SMR11926 | FC36 <i>dsbC::Tn10dCam</i>                                                                                                     | "                                  |
| SMR11927 | FC36 <i>apaG::Tn10dCam</i>                                                                                                     | "                                  |
| SMR11929 | FC36 <i>cyoA::Tn10dCam</i>                                                                                                     | "                                  |
| SMR11930 | FC36 <i>cyoD::Tn10dCam</i>                                                                                                     | "                                  |

|          |                                             |                                          |
|----------|---------------------------------------------|------------------------------------------|
| SMR11932 | FC36 <i>recB</i> ::Tn10dCam                 | "                                        |
| SMR11934 | FC36 <i>groES</i> (P)::Tn10dCam             | "                                        |
| SMR11935 | FC36 <i>lrp</i> ::Tn10dCam                  | "                                        |
| SMR11936 | FC36 <i>phoU</i> ::Tn10dCam                 | "                                        |
| SMR11937 | FC36 <i>rpoE</i> (P)::Tn10dCam              | "                                        |
| SMR11938 | FC36 <i>rpoS</i> ::Tn10dCam                 | "                                        |
| SMR11939 | FC36 <i>sulA</i> ::Tn10dCam                 | "                                        |
| SMR11940 | FC36 <i>lon</i> ::Tn10dCam                  | "                                        |
| SMR11941 | FC36 <i>recC</i> ::Tn10dCam                 | "                                        |
| SMR11942 | FC36 <i>mdh</i> ::Tn10dCam                  | "                                        |
| SMR11943 | FC36 <i>nuoC</i> ::Tn10dCam                 | "                                        |
| SMR11944 | FC36 <i>ubiA</i> ::Tn10dCam                 | "                                        |
| SMR11945 | FC36 <i>ubiD</i> ::Tn10dCam                 | "                                        |
| SMR11946 | FC36 <i>speE</i> ::Tn10dCam                 | "                                        |
| SMR11947 | FC36 <i>pstC</i> ::Tn10dCam                 | "                                        |
| SMR11948 | FC36 <i>srlA</i> ::Tn10dCam                 | "                                        |
| SMR11949 | FC36 <i>yqgE</i> ::Tn10dCam                 | "                                        |
| SMR11950 | FC36 <i>znuA</i> ::Tn10dCam                 | "                                        |
| SMR11951 | FC36 <i>sdhB</i> ::Tn10dCam                 | "                                        |
| SMR11952 | FC36 <i>ubiE</i> ::Tn10dCam                 | "                                        |
| SMR11953 | FC36 <i>nuoJ</i> ::Tn10dCam                 | "                                        |
| SMR11954 | FC36 <i>nuoK</i> ::Tn10dCam                 | "                                        |
| SMR11955 | FC36 <i>ppk</i> ::Tn10dCam                  | "                                        |
| SMR11956 | FC36 <i>nuoG</i> ::Tn10dCam                 | "                                        |
| SMR11957 | FC36 <i>arcA</i> (P)::Tn10dCam              | "                                        |
| SMR11958 | FC36 <i>cysD</i> (P)::Tn10dCam              | "                                        |
| SMR11959 | FC40 <i>rbsK</i> ::Tn10dCam                 | "                                        |
| SMR11960 | FC40 <i>cspC</i> ::Tn10dCam                 | "                                        |
| SMR11962 | SMR4562 $\Delta$ <i>speD738</i> ::FRTKanFRT | SIM down-mutant<br>SMR4562 X P1 (JW0116) |
| SMR11963 | SMR4562 $\Delta$ <i>hfg722</i> ::FRTKanFRT  | SMR4562 X P1 (JW4130)                    |
| SMR11964 | SMR4562 $\Delta$ <i>ldcA782</i> ::FRTKanFRT | SMR4562 X P1 (JW1181)                    |
| SMR11965 | SMR4562 $\Delta$ <i>dsbA723</i> ::FRTKanFRT | SMR4562 X P1 (JW3832)                    |
| SMR11966 | SMR4562 $\Delta$ <i>nagC725</i> ::FRTKanFRT | SMR4562 X P1 (JW0662)                    |
| SMR11967 | SMR4562 $\Delta$ <i>ubiX732</i> ::FRTKanFRT | SMR4562 X P1 (JW2308)                    |
| SMR11968 | SMR4562 $\Delta$ <i>glnK736</i> ::FRTKanFRT | SMR4562 X P1 (JW0440)                    |
| SMR11969 | SMR4562 $\Delta$ <i>trxB786</i> ::FRTKanFRT | SMR4562 X P1 (JW0871)                    |
| SMR11970 | SMR4562 $\Delta$ <i>pepP759</i> ::FRTKanFRT | SMR4562 X P1 (JW2876)                    |
| SMR11971 | SMR4562 $\Delta$ <i>ihfA786</i> ::FRTKanFRT | SMR4562 X P1 (JW1702)                    |
| SMR11972 | SMR4562 $\Delta$ <i>prc755</i> ::FRTKanFRT  | SMR4562 X P1 (JW1819)                    |
| SMR11973 | SMR4562 <i>ligA</i> (P)::Tn10dCam           | SMR4562 X P1 (SMR11412)                  |
| SMR11974 | SMR4562 $\Delta$ <i>rppH754</i> ::FRTKanFRT | SMR4562 X P1 (JW2798)                    |
| SMR11975 | SMR4562 $\Delta$ <i>hdfR785</i> ::FRTKanFRT | SMR4562 X P1 (JW5607)                    |
| SMR11976 | SMR4562 $\Delta$ <i>yqiC737</i> ::FRTKanFRT | SMR4562 X P1 (JW5505)                    |
| SMR11977 | SMR4562 $\Delta$ <i>yifE786</i> ::FRTKanFRT | SMR4562 X P1 (JW3737)                    |
| SMR11978 | SMR4562 $\Delta$ <i>yicC750</i> ::FRTKanFRT | SMR4562 X P1 (JW3619)                    |
| SMR11979 | SMR4562 <i>yfjL</i> (P)::Tn10dCam           | SMR4562 X P1 (SMR11472)                  |
| SMR11980 | SMR4562 <i>yigP</i> ::Tn10dCam              | SMR4562 X P1 (SMR11475)                  |
| SMR11981 | SMR4562 <i>ytjB</i> (P)::Tn10dCam           | SMR4562 X P1 (SMR11476)                  |
| SMR11982 | SMR4562 <i>hemL</i> ::Tn10dCam              | SMR4562 X P1 (SMR11478)                  |
| SMR11983 | SMR4562 <i>proL</i> ::Tn10dCam              | SMR4562 X P1 (SMR11479)                  |
| SMR11984 | SMR4562 $\Delta$ <i>acrB747</i> ::FRTKanFRT | SMR4562 X P1 (JW0451)                    |
| SMR11985 | SMR4562 $\Delta$ <i>acrA748</i> ::FRTKanFRT | SMR4562 X P1 (JW0452)                    |
| SMR11986 | SMR4562 $\Delta$ <i>barA784</i> ::FRTKanFRT | SMR4562 X P1 (JW2757)                    |
| SMR11987 | SMR4562 $\Delta$ <i>uvrY760</i> ::FRTKanFRT | SMR4562 X P1 (JW1899)                    |
| SMR11988 | SMR4562 $\Delta$ <i>nuoL760</i> ::FRTKanFRT | SMR4562 X P1 (JW2273)                    |
| SMR11989 | SMR4562 $\Delta$ <i>sdhD772</i> ::FRTKanFRT | SMR4562 X P1 (JW0712)                    |
| SMR11990 | SMR4562 $\Delta$ <i>apaH761</i> ::FRTKanFRT | SMR4562 X P1 (JW0048)                    |
| SMR11991 | SMR4562 $\Delta$ <i>pgl739</i> ::FRTKanFRT  | SMR4562 X P1 (JW0750)                    |
| SMR11992 | SMR4562 $\Delta$ <i>mll768</i> ::FRTKanFRT  | SMR4562 X P1 (JW1612)                    |
| SMR11993 | SMR4562 $\Delta$ <i>hscB773</i> ::FRTKanFRT | SMR4562 X P1 (JW2511)                    |

|          |                                     |                         |
|----------|-------------------------------------|-------------------------|
| SMR11994 | SMR4562 $\Delta$ argR762::FRTKanFRT | SMR4562 X P1 (JW3206)   |
| SMR11995 | SMR4562 $\Delta$ pgi721::FRTKanFRT  | SMR4562 X P1 (JW3985)   |
| SMR11996 | SMR4562 $\Delta$ ubiH758::FRTKanFRT | SMR4562 X P1 (JW2875)   |
| SMR11997 | SMR4562 $\Delta$ metJ725::FRTKanFRT | SMR4562 X P1 (JW3909)   |
| SMR11998 | SMR4562 $\Delta$ cyaA751::FRTKanFRT | SMR4562 X P1 (JW3778)   |
| SMR11999 | SMR4562 $\Delta$ nuoH764::FRTKanFRT | SMR4562 X P1 (JW2277)   |
| SMR12000 | SMR4562 $\Delta$ ybjT770::FRTKanFRT | SMR4562 X P1 (JW5116)   |
| SMR12001 | SMR4562 $\Delta$ treR788::FRTKanFRT | SMR4562 X P1 (JW4200)   |
| SMR12002 | SMR4562 $\Delta$ fruR786::FRTKanFRT | SMR4562 X P1 (JW0078)   |
| SMR12003 | SMR4562 $\Delta$ lipB769::FRTKanFRT | SMR4562 X P1 (JW5089)   |
| SMR12004 | SMR4562 $\Delta$ znuC783::FRTKanFRT | SMR4562 X P1 (JW1847)   |
| SMR12005 | SMR4562 $\Delta$ argD767::FRTKanFRT | SMR4562 X P1 (JW3322)   |
| SMR12006 | SMR4562 $\Delta$ pstB756::FRTKanFRT | SMR4562 X P1 (JW3703)   |
| SMR12007 | SMR4562 $\Delta$ fre784::FRTKanFRT  | SMR4562 X P1 (JW3820)   |
| SMR12008 | SMR4562 $\Delta$ tatC781::FRTKanFRT | SMR4562 X P1 (JW3815)   |
| SMR12023 | SMR4562 arcA(P)::Tn10dCam           | SMR4562 X P1 (SMR11410) |
| SMR12050 | SMR4562 $\Delta$ yqgE723::FRTKanFRT | SMR4562 X P1 (JW2915)   |
| SMR12056 | SMR4562 $\Delta$ yjcC755::FRTKanFRT | SMR4562 X P1 (JW4022)   |
| SMR12058 | SMR4562 $\Delta$ speE739::FRTKanFRT | SMR4562 X P1 (JW0117)   |
| SMR12060 | SMR4562 $\Delta$ mdh761::FRTKanFRT  | SMR4562 X P1 (JW3205)   |
| SMR12062 | SMR4562 $\Delta$ nuoK761::FRTKanFRT | SMR4562 X P1 (JW2274)   |
| SMR12065 | SMR4562 $\Delta$ ubiE778::FRTKanFRT | SMR4562 X P1 (JW5581)   |
| SMR12067 | SMR4562 $\Delta$ apaG762::FRTKanFRT | SMR4562 X P1 (JW0049)   |
| SMR12069 | SMR4562 $\Delta$ dsbC744::FRTKanFRT | SMR4562 X P1 (JW2861)   |
| SMR12071 | SMR4562 $\Delta$ pstC758::FRTKanFRT | SMR4562 X P1 (JW3705)   |
| SMR12075 | SMR4562 $\Delta$ lon725::FRTKanFRT  | SMR4562 X P1 (JW0429)   |
| SMR12081 | SMR4562 $\Delta$ znuA782::FRTKanFRT | SMR4562 X P1 (JW5831)   |
| SMR12130 | SMR4562 $\Delta$ nuoJ762::FRTKanFRT | SMR4562 X P1 (JW2275)   |
| SMR12134 | SMR4562 yhhK::Tn10dCam              | SMR4562 X P1 (SMR11482) |
| SMR12140 | SMR4562 $\Delta$ nuoC768::FRTKanFRT | SMR4562 X P1 (JW5375)   |
| SMR12148 | SMR4562 $\Delta$ cspC747::FRTKanFRT | SMR4562 X P1 (JW1812)   |
| SMR12205 | SMR4562 $\Delta$ srlA777::FRTKanFRT | SMR4562 X P1 (JW5429)   |
| SMR12210 | SMR4562 $\Delta$ rppH754::FRT       | SMR11974 X pCP20        |
| SMR12211 | SMR4562 $\Delta$ znuC783::FRT       | SMR12004 X pCP20        |
| SMR12216 | SMR4562 $\Delta$ yqiC737::FRT       | SMR11976 X pCP20        |
| SMR12219 | SMR4562 $\Delta$ lipB769::FRT       | SMR12003 X pCP20        |
| SMR12220 | SMR4562 $\Delta$ acrA748::FRT       | SMR11985 X pCP20        |
| SMR12221 | SMR4562 $\Delta$ ybjT770::FRT       | SMR12000 X pCP20        |
| SMR12223 | SMR4562 $\Delta$ nuoC768::FRT       | SMR12140 X pCP20        |
| SMR12227 | SMR4562 $\Delta$ glnK736::FRT       | SMR11968 X pCP20        |
| SMR12232 | SMR4562 $\Delta$ pstB756::FRT       | SMR12006 X pCP20        |
| SMR12233 | SMR4562 $\Delta$ srlA777::FRT       | SMR12205 X pCP20        |
| SMR12235 | SMR4562 $\Delta$ hdfR785::FRT       | SMR11975 X pCP20        |
| SMR12236 | SMR4562 $\Delta$ znuA782::FRT       | SMR12081 X pCP20        |
| SMR12238 | SMR4562 $\Delta$ yifE786::FRT       | SMR11977 X pCP20        |
| SMR12239 | SMR4562 $\Delta$ nuoL760::FRT       | SMR11988 X pCP20        |
| SMR12240 | SMR4562 $\Delta$ speE739::FRT       | SMR12058 X pCP20        |
| SMR12241 | SMR4562 $\Delta$ apaG762::FRT       | SMR12067 X pCP20        |
| SMR12242 | SMR4562 $\Delta$ ubiE778::FRT       | SMR12065 X pCP20        |
| SMR12251 | SMR4562 $\Delta$ prc755::FRT        | SMR11972 X pCP20        |
| SMR12252 | SMR4562 $\Delta$ sdhD772::FRT       | SMR11989 X pCP20        |
| SMR12253 | SMR4562 $\Delta$ barA784::FRT       | SMR11986 X pCP20        |
| SMR12254 | SMR4562 $\Delta$ lon725::FRT        | SMR12075 X pCP20        |
| SMR12257 | SMR4562 $\Delta$ pgl739::FRT        | SMR11991 X pCP20        |
| SMR12260 | SMR4562 $\Delta$ ubiH758::FRT       | SMR11996 X pCP20        |
| SMR12261 | SMR4562 $\Delta$ hfg722::FRT        | SMR11963 X pCP20        |
| SMR12302 | SMR4562 cysD(P)::Tn10dCam           | SMR4562 X P1 (SMR11925) |
| SMR12307 | SMR4562 $\Delta$ hscB773::FRT       | SMR11993 X pCP20        |

|          |                                                                    |                          |
|----------|--------------------------------------------------------------------|--------------------------|
| SMR12309 | SMR4562 $\Delta$ dsbA723::FRT                                      | SMR11965 X pCP20         |
| SMR12311 | SMR4562 <i>ubiA</i> ::Tn10dCam                                     | SMR4562 X P1 (SMR11944)  |
| SMR12313 | SMR4562 <i>ubiD</i> ::Tn10dCam                                     | SMR4562 X P1 (SMR11945)  |
| SMR12314 | SMR4562 $\Delta$ uvrY760::FRT                                      | SMR11987 X pCP20         |
| SMR12316 | SMR4562 $\Delta$ ygfA763::FRTKanFRT                                | SMR4562 X P1 (JW2879)    |
| SMR12332 | SMR4562 $\Delta$ sdhB774::FRTKanFRT                                | SMR4562 X P1 (JW0714)    |
| SMR12338 | SMR4562 $\Delta$ cyoA789::FRTKanFRT                                | SMR4562 X P1 (JW0422)    |
| SMR12340 | SMR4562 $\Delta$ cyoD786::FRTKanFRT                                | SMR4562 X P1 (JW0419)    |
| SMR12562 | SMR4562 $\Delta$ nuoC768::FRT <i>rssB</i> ::Tet                    | SMR12223 X P1 (SMR7530)  |
| SMR12566 | SMR4562 <i>rssB</i> ::Tet                                          | SMR4562 X P1 (SMR7530)   |
| SMR12570 | SMR4562 $\Delta$ cyoA789::FRT                                      | SMR12338 X pCP20         |
| SMR12574 | SMR4562 $\Delta$ cyoD786::FRT                                      | SMR12340 X pCP20         |
| SMR12580 | SMR4562 $\Delta$ arcA726::FRTKanFRT                                | SMR4562 X P1 (JW4364)    |
| SMR12582 | SMR4562 $\Delta$ arcB738::FRTKanFRT                                | SMR4562 X P1 (JW5536)    |
| SMR12584 | SMR4562 $\Delta$ rbsK781::FRTKanFRT                                | SMR4562 X P1 (JW3731)    |
| SMR12590 | SMR4562 $\Delta$ nuoC768::FRT $\Delta$ arcA726::FRTKanFRT          | SMR12223 X P1 (JW4364)   |
| SMR12594 | SMR4562 $\Delta$ nuoC768::FRT $\Delta$ arcB738::FRTKanFRT          | SMR12223 X P1 (JW5536)   |
| SMR12596 | SMR4562 <i>ubiD</i> ::Tn10dCam $\Delta$ arcA726::FRTKanFRT         | SMR12313 X P1 (JW4364)   |
| SMR12598 | SMR4562 <i>ubiD</i> ::Tn10dCam $\Delta$ arcB738::FRTKanFRT         | SMR12313 X P1 (JW5536)   |
| SMR12613 | SMR4562 <i>ubiD</i> ::Tn10dCam <i>rssB</i> ::Tet                   | SMR12313 X P1 (SMR7530)  |
| SMR12655 | SMR4562 $\Delta$ nuoC768::FRT <i>yiaG-yfp</i> FRTcatFRT            | SMR12223 X P1 (SMR10582) |
| SMR12657 | SMR4562 $\Delta$ ubiE778::FRT <i>yiaG-yfp</i> FRTcatFRT            | SMR12242 X P1 (SMR10582) |
| SMR12661 | SMR4562 <i>yiaG-yfp</i> FRTcatFRT $\Delta$ rpoS746::FRTKanFRT      | SMR10582 X P1 (JW5437)   |
| SMR12672 | SMR4562 $\Delta$ arcA726::FRT                                      | SMR12580 X pCP20         |
| SMR12673 | SMR4562 $\Delta$ arcB738::FRT                                      | SMR12582 X pCP20         |
| SMR12683 | SMR4562 $\Delta$ arcA726::FRT <i>yiaG-yfp</i> FRTcatFRT            | SMR12672 X P1 (SMR10582) |
| SMR12684 | SMR4562 $\Delta$ arcB738::FRT <i>yiaG-yfp</i> FRTcatFRT            | SMR12673 X P1 (SMR10582) |
| SMR12686 | SMR4562 <i>yiaG-yfp</i> FRTcatFRT $\Delta$ ubiH758::FRTKanFRT      | SMR10582 X P1 (JW2875)   |
| SMR12692 | SMR4562 <i>yiaG-yfp</i> FRTcatFRT <i>rssB</i> ::Tet                | SMR10582 X P1 (SMR7530)  |
| SMR12699 | SMR4562 <i>yiaG-yfp</i> FRTcatFRT $\Delta$ ubiX732::FRTKanFRT      | SMR10582 X P1 (JW2308)   |
| SMR12828 | SMR4562 <i>yiaG-yfp</i> FRTcatFRT $\Delta$ speD738::FRTKanFRT      | SMR10582 X P1 (JW0116)   |
| SMR12830 | SMR4562 <i>yiaG-yfp</i> FRTcatFRT $\Delta$ apaH761::FRTKanFRT      | SMR10582 X P1 (JW0048)   |
| SMR13033 | SMR4562 <i>yiaG-yfp</i> FRTcatFRT <i>sdhD772</i> ::FRTKanFRT       | SMR11989 X P1 (SMR10582) |
| SMR13035 | SMR4562 $\Delta$ cyoD786::FRTKanFRT <i>yiaG-yfp</i> FRTcatFRT      | SMR12340 X P1 (SMR10582) |
| SMR13048 | SMR4562 $\Delta$ arcA726::FRT $\Delta$ cyoD786::FRTKanFRT          | SMR12672 X P1 (JW0419)   |
| SMR13050 | SMR4562 $\Delta$ arcB738::FRT $\Delta$ cyoD786::FRTKanFRT          | SMR12673 X P1 (JW0419)   |
| SMR13058 | SMR4562 $\Delta$ mdh761::FRTKanFRT <i>yiaG-yfp</i> FRTcatFRT       | SMR12060 X P1 (SMR10582) |
| SMR13084 | SMR4562 $\Delta$ cyoD786::FRT <i>rssB</i> ::Tet                    | SMR12574 X P1 (SMR7530)  |
| SMR13096 | SMR4562 <i>yiaG-yfp</i> FRT                                        | SMR10582 X pCP20         |
| SMR13098 | SMR4562 <i>yiaG-yfp</i> FRT <i>ubiD</i> ::Tn10dCam                 | SMR13096 X P1 (SMR11945) |
| SMR13274 | FC40 day 5 Lac <sup>+</sup> isolate $\Delta$ cyoD786::FRTKanFRT    | SMR3856 X P1 (JW0419)    |
| SMR13275 | FC40 day 5 Lac <sup>+</sup> isolate $\Delta$ cyoD786::FRTKanFRT    | SMR3858 X P1 (JW0419)    |
| SMR13276 | FC40 day 5 Lac <sup>+</sup> isolate $\Delta$ cyoD786::FRTKanFRT    | SMR3859 X P1 (JW0419)    |
| SMR13280 | FC40 day 5 Lac <sup>+</sup> isolate $\Delta$ ubiE778::FRTKanFRT    | SMR3856 X P1 (JW5581)    |
| SMR13281 | FC40 day 5 Lac <sup>+</sup> isolate $\Delta$ ubiE778::FRTKanFRT    | SMR3858 X P1 (JW5581)    |
| SMR13282 | FC40 day 5 Lac <sup>+</sup> isolate $\Delta$ ubiE778::FRTKanFRT    | SMR3859 X P1 (JW5581)    |
| SMR13283 | FC40 day 5 Lac <sup>+</sup> isolate <i>ubiD</i> ::Tn10dCam         | SMR3856 X P1 (SMR11945)  |
| SMR13284 | FC40 day 5 Lac <sup>+</sup> isolate <i>ubiD</i> ::Tn10dCam         | SMR3858 X P1 (SMR11945)  |
| SMR13285 | FC40 day 5 Lac <sup>+</sup> isolate <i>ubiD</i> ::Tn10dCam         | SMR3859 X P1 (SMR11945)  |
| SMR13289 | FC40 day 5 Lac <sup>+</sup> isolate $\Delta$ mdh761::FRTKanFRT     | SMR3856 X P1 (JW3205)    |
| SMR13290 | FC40 day 5 Lac <sup>+</sup> isolate $\Delta$ mdh761::FRTKanFRT     | SMR3858 X P1 (JW3205)    |
| SMR13291 | FC40 day 5 Lac <sup>+</sup> isolate $\Delta$ mdh761::FRTKanFRT     | SMR3859 X P1 (JW3205)    |
| SMR13292 | FC40 day 5 Lac <sup>+</sup> isolate $\Delta$ sdhD772::FRTKanFRT    | SMR3856 X P1 (JW0712)    |
| SMR13293 | FC40 day 5 Lac <sup>+</sup> isolate $\Delta$ sdhD772::FRTKanFRT    | SMR3858 X P1 (JW0712)    |
| SMR13294 | FC40 day 5 Lac <sup>+</sup> isolate $\Delta$ sdhD772::FRTKanFRT    | SMR3859 X P1 (JW0712)    |
| SMR13295 | SMR4562 <i>yiaG-yfp</i> FRTcatFRT $\Delta$ pgi721::FRTKanFRT       | SMR10582 X P1 (JW3985)   |
| SMR13301 | SMR4562 day 5 Lac <sup>+</sup> isolate $\Delta$ nuoC768::FRTKanFRT | SMR3856 X P1 (JW5375)    |
| SMR13302 | SMR4562 day 5 Lac <sup>+</sup> isolate $\Delta$ nuoC768::FRTKanFRT | SMR3858 X P1 (JW5375)    |

|          |                                                                                                                                                                                               |                         |
|----------|-----------------------------------------------------------------------------------------------------------------------------------------------------------------------------------------------|-------------------------|
| SMR13303 | SMR4562 day 5 Lac <sup>+</sup> isolate $\Delta$ nuoC768::FRTKanFRT                                                                                                                            | SMR3859 X P1 (JW5375)   |
| SMR13310 | SMR4562 <i>yiaG-yfp</i> FRT <i>cat</i> FRT $\Delta$ speE739::FRTKanFRT                                                                                                                        | SMR10582 X P1 (JW0117)  |
| SMR13312 | SMR4562 <i>yiaG-yfp</i> FRT <i>cat</i> FRT $\Delta$ rbsK781::FRTKanFRT                                                                                                                        | SMR10582 X P1 (JW3731)  |
| SMR13448 | SMR4562 $\Delta$ araBAD567 $\Delta$ att $\lambda$ ::P <sub>BAD</sub> I-Scel <i>rpoS</i> ::Tn10                                                                                                | SMR6276 X P1 (SMR6541)  |
| SMR13473 | SMR4562 $\Delta$ phoU755::FRTKanFRT                                                                                                                                                           | SMR4562 X P1 (JW3702)   |
| SMR13484 | SMR4562 $\Delta$ araBAD567 $\Delta$ att $\lambda$ ::P <sub>BAD</sub> I-Scel<br>$\Delta$ nuoC768::FRTKanFRT                                                                                    | SMR6276 X P1 (JW5375)   |
| SMR13487 | SMR4562 $\Delta$ araBAD567 $\Delta$ att $\lambda$ ::P <sub>BAD</sub> I-Scel<br>$\Delta$ cyoD786::FRTKanFRT                                                                                    | SMR6276 X P1 (JW0419)   |
| SMR13489 | SMR4562 $\Delta$ araBAD567 $\Delta$ att $\lambda$ ::P <sub>BAD</sub> I-Scel <i>rpoS</i> ::Tn10<br>$\Delta$ nuoC768::FRTKanFRT                                                                 | SMR13448 X P1 (JW5375)  |
| SMR13491 | SMR4562 $\Delta$ araBAD567 $\Delta$ att $\lambda$ ::P <sub>BAD</sub> I-Scel <i>rpoS</i> ::Tn10<br>$\Delta$ cyoD786::FRTKanFRT                                                                 | SMR13448 X P1 (JW0419)  |
| SMR13493 | SMR4562 $\Delta$ araBAD567 $\Delta$ att $\lambda$ ::P <sub>BAD</sub> I-Scel<br>$\Delta$ nuoC768::FRT                                                                                          | SMR13484 X pCP20        |
| SMR13494 | SMR4562 $\Delta$ araBAD567 $\Delta$ att $\lambda$ ::P <sub>BAD</sub> I-Scel<br>$\Delta$ cyoD786::FRT                                                                                          | SMR13487 X pCP20        |
| SMR13495 | SMR4562 $\Delta$ araBAD567 $\Delta$ att $\lambda$ ::P <sub>BAD</sub> I-Scel<br>$\Delta$ cyoD786::FRT [F' <i>codA21</i> ::mini-Tn7Kan(I-Scel site )<br>$\Delta$ tral::dhfR]                    | SMR13494 X P1 (SMR6308) |
| SMR13497 | SMR4562 $\Delta$ araBAD567 $\Delta$ att $\lambda$ ::P <sub>BAD</sub> I-Scel<br>$\Delta$ nuoC768::FRT [F' <i>codA21</i> ::mini-Tn7Kan(I-Scel site )<br>$\Delta$ tral::dhfR]                    | SMR13493 X P1 (SMR6308) |
| SMR13499 | SMR4562 $\Delta$ araBAD567 $\Delta$ att $\lambda$ ::P <sub>BAD</sub> I-Scel <i>rpoS</i> ::Tn10<br>$\Delta$ nuoC768::FRT                                                                       | SMR13489 X pCP20        |
| SMR13500 | SMR4562 $\Delta$ araBAD567 $\Delta$ att $\lambda$ ::P <sub>BAD</sub> I-Scel <i>rpoS</i> ::Tn10<br>$\Delta$ cyoD786::FRT                                                                       | SMR13491 X pCP20        |
| SMR13510 | SMR4562 $\Delta$ araBAD567 $\Delta$ att $\lambda$ ::P <sub>BAD</sub> I-Scel<br>$\Delta$ mdh761::FRTKanFRT                                                                                     | SMR6276 X P1 (JW3205)   |
| SMR13630 | SMR4562 $\Delta$ araBAD567 $\Delta$ att $\lambda$ ::P <sub>BAD</sub> I-Scel <i>rpoS</i> ::Tn10<br>$\Delta$ nuoC768::FRT [F' <i>codA21</i> ::mini-Tn7Kan(I-Scel site )<br>$\Delta$ tral::dhfR] | SMR13499 X P1 (SMR6308) |
| SMR13633 | SMR4562 $\Delta$ araBAD567 $\Delta$ att $\lambda$ ::P <sub>BAD</sub> I-Scel <i>rpoS</i> ::Tn10<br>$\Delta$ cyoD786::FRT [F' <i>codA21</i> ::mini-Tn7Kan(I-Scel site )<br>$\Delta$ tral::dhfR] | SMR13500 X P1 (SMR6308) |
| SMR13635 | SMR4562 $\Delta$ araBAD567 $\Delta$ att $\lambda$ ::P <sub>BAD</sub> I-Scel<br>$\Delta$ mdh761::FRT                                                                                           | SMR13510 X pCP20        |
| SMR13640 | SMR4562 <i>nuoG</i> ::Tn10dCam                                                                                                                                                                | SMR4562 X P1 (SMR11956) |
| SMR13652 | SMR4562 $\Delta$ nuoJ762::FRT                                                                                                                                                                 | SMR12130 X pCP20        |
| SMR13653 | SMR4562 $\Delta$ nuoK761::FRT                                                                                                                                                                 | SMR12062 X pCP20        |
| SMR13654 | SMR4562 $\Delta$ nuoH764::FRT                                                                                                                                                                 | SMR11999 X pCP20        |
| SMR13655 | SMR4562 $\Delta$ araBAD567 $\Delta$ att $\lambda$ ::P <sub>BAD</sub> I-Scel <i>rpoS</i> ::Tn10<br>$\Delta$ ubiE778::FRTKanFRT                                                                 | SMR13448 X P1 (JW5581)  |
| SMR13657 | SMR4562 $\Delta$ araBAD567 $\Delta$ att $\lambda$ ::P <sub>BAD</sub> I-Scel<br>$\Delta$ ubiE778::FRTKanFRT                                                                                    | SMR6276 X P1 (JW5581)   |
| SMR13659 | SMR4562 $\Delta$ araBAD567 $\Delta$ att $\lambda$ ::P <sub>BAD</sub> I-Scel <i>rpoS</i> ::Tn10<br>$\Delta$ ubiE778::FRT                                                                       | SMR13655 X pCP20        |
| SMR13661 | SMR4562 $\Delta$ araBAD567 $\Delta$ att $\lambda$ ::P <sub>BAD</sub> I-Scel<br>$\Delta$ ubiE778::FRT                                                                                          | SM13657 X pCP20         |
| SMR13663 | SMR4562 $\Delta$ araBAD567 $\Delta$ att $\lambda$ ::P <sub>BAD</sub> I-Scel <i>rpoS</i> ::Tn10<br>$\Delta$ ubiE778::FRT [F' <i>codA21</i> ::mini-Tn7Kan(I-Scel site )<br>$\Delta$ tral::dhfR] | SMR13659 X P1 (SMR6308) |
| SMR13669 | SMR4562 $\Delta$ araBAD567 $\Delta$ att $\lambda$ ::P <sub>BAD</sub> I-Scel<br>$\Delta$ ubiE778::FRT [F' <i>codA21</i> ::mini-Tn7Kan(I-Scel site )<br>$\Delta$ tral::dhfR]                    | SMR13661 X P1 (SMR6308) |
| SMR14259 | SMR4562 <i>yiaG-yfp</i> FRT <i>cat</i> FRT $\Delta$ yifE786::FRTKanFRT                                                                                                                        | SMR10582 X P1 (JW3737)  |
| SMR14261 | SMR4562 <i>yiaG-yfp</i> FRT <i>cat</i> FRT $\Delta$ dhfR785::FRTKanFRT                                                                                                                        | SMR10582 X P1 (JW5607)  |

|          |                                                                                                                                                                                                                                       |                          |
|----------|---------------------------------------------------------------------------------------------------------------------------------------------------------------------------------------------------------------------------------------|--------------------------|
| SMR14263 | SMR4562 <i>yiaG-yfp</i> FRT <i>cat</i> FRT $\Delta$ <i>cspC747</i> ::FRTKanFRT                                                                                                                                                        | SMR10582 X P1 (JW1812)   |
| SMR14267 | SMR4562 <i>yiaG-yfp</i> FRT <i>cat</i> FRT $\Delta$ <i>fre784</i> ::FRTKanFRT                                                                                                                                                         | SMR10582 X P1 (JW3820)   |
| SMR14269 | SMR4562 <i>yiaG-yfp</i> FRT <i>cat</i> FRT $\Delta$ <i>metJ725</i> ::FRTKanFRT                                                                                                                                                        | SMR10582 X P1 (JW3909)   |
| SMR14273 | SMR4562 <i>yiaG-yfp</i> FRT <i>cat</i> FRT $\Delta$ <i>nuoL760</i> ::FRTKanFRT                                                                                                                                                        | SMR10582 X P1 (JW2273)   |
| SMR14275 | SMR4562 <i>yiaG-yfp</i> FRT <i>cat</i> FRT $\Delta$ <i>hscB773</i> ::FRTKanFRT                                                                                                                                                        | SMR10582 X P1 (JW2511)   |
| SMR14281 | SMR4562 <i>yiaG-yfp</i> FRT <i>cat</i> FRT $\Delta$ <i>glnK736</i> ::FRTKanFRT                                                                                                                                                        | SMR10582 X P1 (JW0440)   |
| SMR14283 | SMR4562 <i>yiaG-yfp</i> FRT <i>cat</i> FRT $\Delta$ <i>cyoA789</i> ::FRTKanFRT                                                                                                                                                        | SMR10582 X P1 (JW0422)   |
| SMR14285 | SMR4562 <i>yiaG-yfp</i> FRT <i>cat</i> FRT $\Delta$ <i>nuoK761</i> ::FRTKanFRT                                                                                                                                                        | SMR10582 X P1 (JW2274)   |
| SMR14287 | SMR4562 <i>yiaG-yfp</i> FRT <i>cat</i> FRT $\Delta$ <i>nuoH764</i> ::FRTKanFRT                                                                                                                                                        | SMR10582 X P1 (JW2277)   |
| SMR14289 | SMR4562 <i>yiaG-yfp</i> FRT <i>cat</i> FRT $\Delta$ <i>nuoJ762</i> ::FRTKanFRT                                                                                                                                                        | SMR10582 X P1 (JW2275)   |
| SMR14295 | SMR4562 <i>yiaG-yfp</i> FRT <i>cat</i> FRT $\Delta$ <i>hfg722</i> ::FRTKanFRT                                                                                                                                                         | SMR10582 X P1 (JW4130)   |
| SMR14297 | SMR4562 <i>yiaG-yfp</i> FRT <i>cat</i> FRT $\Delta$ <i>sdhB774</i> ::FRTKanFRT                                                                                                                                                        | SMR10582 X P1 (JW0714)   |
| SMR14420 | SMR4562 <i>yiaG-yfp</i> FRT <i>nuoG</i> ::Tn10dCam                                                                                                                                                                                    | SMR13096 X P1 (SMR11956) |
| SMR14431 | SMR4562 <i>yiaG-yfp</i> FRT <i>hemL</i> ::Tn10dCam                                                                                                                                                                                    | SMR13096 X P1 (SMR11478) |
| SMR14447 | SMR4562 <i>yiaG-yfp</i> FRT <i>ubiA</i> ::Tn10dCam                                                                                                                                                                                    | SMR13096 X P1 (SMR11944) |
| SMR14455 | SMR4562 $\Delta$ <i>araBAD567</i> $\Delta$ <i>att<math>\lambda</math></i> ::P <sub>BAD</sub> -Scel<br><i>Amdh761</i> ::FRT [F' <i>codA21</i> ::mini-Tn7Kan(-Scel site )<br><i><math>\Delta</math>tral::dhfR</i> ]                     | SMR13635 X P1 (SMR6308)  |
| SMR14461 | SMR4562 $\Delta$ <i>araBAD567</i> $\Delta$ <i>att<math>\lambda</math></i> ::P <sub>BAD</sub> -Scel<br><i>Amdh761</i> ::FRT <i>rpoS</i> ::Tn10                                                                                         | SMR13635 X P1 (SMR6541)  |
| SMR14467 | SMR4562 $\Delta$ <i>araBAD567</i> $\Delta$ <i>att<math>\lambda</math></i> ::P <sub>BAD</sub> -Scel<br><i>Amdh761</i> ::FRT <i>rpoS</i> ::Tn10 [F' <i>codA21</i> ::mini-Tn7Kan(-<br>Scel site ) <i><math>\Delta</math>tral::dhfR</i> ] | SMR14461 X P1 (SMR6308)  |
| SMR14471 | MG1655 <i>galk</i> ::P <sub>lac</sub> <i>Cfp</i> Amp                                                                                                                                                                                  | MG1655 X P1 (MG22)       |
| SMR15080 | MG1655 <i>galk</i> ::P <sub>lac</sub> <i>Cfp</i> Amp $\Delta$ <i>cyoA789</i> ::FRTKanFRT                                                                                                                                              | SMR14471 X P1 (JW0422)   |
| SMR15081 | MG1655 <i>galk</i> ::P <sub>lac</sub> <i>Cfp</i> Amp $\Delta$ <i>cyoD786</i> ::FRTKanFRT                                                                                                                                              | SMR14471 X P1 (JW0419)   |
| SMR15082 | MG1655 <i>galk</i> ::P <sub>lac</sub> <i>Cfp</i> Amp $\Delta$ <i>cspC747</i> ::FRTKanFRT                                                                                                                                              | SMR14471 X P1 (JW1812)   |
| SMR15083 | MG1655 <i>galk</i> ::P <sub>lac</sub> <i>Cfp</i> Amp $\Delta$ <i>fre784</i> ::FRTKanFRT                                                                                                                                               | SMR14471 X P1 (JW3820)   |
| SMR15084 | MG1655 <i>galk</i> ::P <sub>lac</sub> <i>Cfp</i> Amp $\Delta$ <i>glnK736</i> ::FRTKanFRT                                                                                                                                              | SMR14471 X P1 (JW0440)   |
| SMR15085 | MG1655 <i>galk</i> ::P <sub>lac</sub> <i>Cfp</i> Amp $\Delta$ <i>hdfR785</i> ::FRTKanFRT                                                                                                                                              | SMR14471 X P1 (JW5607)   |
| SMR15086 | MG1655 <i>galk</i> ::P <sub>lac</sub> <i>Cfp</i> Amp $\Delta$ <i>hscB773</i> ::FRTKanFRT                                                                                                                                              | SMR14471 X P1 (JW2511)   |
| SMR15087 | MG1655 <i>galk</i> ::P <sub>lac</sub> <i>Cfp</i> Amp <i>Amdh761</i> ::FRTKanFRT                                                                                                                                                       | SMR14471 X P1 (JW3205)   |
| SMR15088 | MG1655 <i>galk</i> ::P <sub>lac</sub> <i>Cfp</i> Amp $\Delta$ <i>metJ725</i> ::FRTKanFRT                                                                                                                                              | SMR14471 X P1 (JW3909)   |
| SMR15089 | MG1655 <i>galk</i> ::P <sub>lac</sub> <i>Cfp</i> Amp $\Delta$ <i>nuoC768</i> ::FRTKanFRT                                                                                                                                              | SMR14471 X P1 (JW5375)   |
| SMR15090 | MG1655 <i>galk</i> ::P <sub>lac</sub> <i>Cfp</i> Amp <i>nuoG</i> ::Tn10dCam                                                                                                                                                           | SMR14471 X P1 (SMR11956) |
| SMR15091 | MG1655 <i>galk</i> ::P <sub>lac</sub> <i>Cfp</i> Amp $\Delta$ <i>nuoH764</i> ::FRTKanFRT                                                                                                                                              | SMR14471 X P1 (JW2277)   |
| SMR15092 | MG1655 <i>galk</i> ::P <sub>lac</sub> <i>Cfp</i> Amp $\Delta$ <i>nuoJ762</i> ::FRTKanFRT                                                                                                                                              | SMR14471 X P1 (JW2275)   |
| SMR15093 | MG1655 <i>galk</i> ::P <sub>lac</sub> <i>Cfp</i> Amp $\Delta$ <i>nuoK761</i> ::FRTKanFRT                                                                                                                                              | SMR14471 X P1 (JW2274)   |
| SMR15094 | MG1655 <i>galk</i> ::P <sub>lac</sub> <i>Cfp</i> Amp $\Delta$ <i>nuoL760</i> ::FRTKanFRT                                                                                                                                              | SMR14471 X P1 (JW2273)   |
| SMR15095 | MG1655 <i>galk</i> ::P <sub>lac</sub> <i>Cfp</i> Amp $\Delta$ <i>pgi721</i> ::FRTKanFRT                                                                                                                                               | SMR14471 X P1 (JW3985)   |
| SMR15096 | MG1655 <i>galk</i> ::P <sub>lac</sub> <i>Cfp</i> Amp $\Delta$ <i>rbsK781</i> ::FRTKanFRT                                                                                                                                              | SMR14471 X P1 (JW3731)   |
| SMR15097 | MG1655 <i>galk</i> ::P <sub>lac</sub> <i>Cfp</i> Amp $\Delta$ <i>rpoS746</i> ::FRTKanFRT                                                                                                                                              | SMR14471 X P1 (JW5437)   |
| SMR15098 | MG1655 <i>galk</i> ::P <sub>lac</sub> <i>Cfp</i> Amp $\Delta$ <i>sdhB774</i> ::FRTKanFRT                                                                                                                                              | SMR14471 X P1 (JW0714)   |
| SMR15099 | MG1655 <i>galk</i> ::P <sub>lac</sub> <i>Cfp</i> Amp $\Delta$ <i>sdhD772</i> ::FRTKanFRT                                                                                                                                              | SMR14471 X P1 (JW0712)   |
| SMR15100 | MG1655 <i>galk</i> ::P <sub>lac</sub> <i>Cfp</i> Amp $\Delta$ <i>speD738</i> ::FRTKanFRT                                                                                                                                              | SMR14471 X P1 (JW0116)   |
| SMR15101 | MG1655 <i>galk</i> ::P <sub>lac</sub> <i>Cfp</i> Amp $\Delta$ <i>speE739</i> ::FRTKanFRT                                                                                                                                              | SMR14471 X P1 (JW0117)   |
| SMR15102 | MG1655 <i>galk</i> ::P <sub>lac</sub> <i>Cfp</i> Amp <i>ubiA</i> ::Tn10dCam                                                                                                                                                           | SMR14471 X P1 (SMR11944) |
| SMR15103 | MG1655 <i>galk</i> ::P <sub>lac</sub> <i>Cfp</i> Amp <i>ubiD</i> ::Tn10dCam                                                                                                                                                           | SMR14471 X P1 (SMR11945) |
| SMR15104 | MG1655 <i>galk</i> ::P <sub>lac</sub> <i>Cfp</i> Amp $\Delta$ <i>ubiE778</i> ::FRTKanFRT                                                                                                                                              | SMR14471 X P1 (JW5581)   |
| SMR15105 | MG1655 <i>galk</i> ::P <sub>lac</sub> <i>Cfp</i> Amp $\Delta$ <i>ubiH758</i> ::FRTKanFRT                                                                                                                                              | SMR14471 X P1 (JW2875)   |
| SMR15106 | MG1655 <i>galk</i> ::P <sub>lac</sub> <i>Cfp</i> Amp $\Delta$ <i>ubiX732</i> ::FRTKanFRT                                                                                                                                              | SMR14471 X P1 (JW2308)   |
| SMR15107 | MG1655 <i>galk</i> ::P <sub>lac</sub> <i>Cfp</i> Amp $\Delta$ <i>yifE786</i> ::FRTKanFRT                                                                                                                                              | SMR14471 X P1 (JW3737)   |
| SMR15108 | MG1655 <i>galk</i> ::P <sub>lac</sub> <i>Cfp</i> Amp <i>hemL</i> ::Tn10dCam                                                                                                                                                           | SMR14471 X P1 (SMR11478) |
| SMR15109 | MG1655 <i>galk</i> ::P <sub>lac</sub> <i>Cfp</i> Amp $\Delta$ <i>hfg722</i> ::FRTKanFRT                                                                                                                                               | SMR14471 X P1 (JW4130)   |
| SMR15249 | CAG45114 $\Delta$ <i>nuoH764</i> ::FRTKanFRT                                                                                                                                                                                          | CAG45114 X P1 (JW2277)   |
| SMR15253 | CAG45114 $\Delta$ <i>fruR786</i> ::FRTKanFRT                                                                                                                                                                                          | CAG45114 X P1 (JW0078)   |
| SMR15257 | CAG45114 $\Delta$ <i>ubiE778</i> ::FRTKanFRT                                                                                                                                                                                          | CAG45114 X P1 (JW5581)   |
| SMR15259 | CAG45114 $\Delta$ <i>lipB769</i> ::FRTKanFRT                                                                                                                                                                                          | CAG45114 X P1 (JW5089)   |

|          |                                                                                                                            |                          |
|----------|----------------------------------------------------------------------------------------------------------------------------|--------------------------|
| SMR15261 | CAG45114 $\Delta$ <i>sdhB774</i> ::FRTKanFRT                                                                               | CAG45114 X P1 (JW0714)   |
| SMR15265 | CAG45114 $\Delta$ <i>lrp787</i> ::FRTKanFRT                                                                                | CAG45114 X P1 (JW0872)   |
| SMR15267 | CAG45114 $\Delta$ <i>sdhD772</i> ::FRTKanFRT                                                                               | CAG45114 X P1 (JW0712)   |
| SMR15271 | CAG45114 <i>rssB</i> ::Tet                                                                                                 | CAG45114 X P1 (SMR7530)  |
| SMR15273 | CAG45114 $\Delta$ <i>lon725</i> ::FRTKanFRT                                                                                | CAG45114 X P1 (JW0429)   |
| SMR15277 | CAG45114 $\Delta$ <i>nuoC768</i> ::RTKanFRT                                                                                | CAG45114 X P1 (JW5375)   |
| SMR15283 | CAG45114 $\Delta$ <i>trxB786</i> ::FRTKanFRT                                                                               | CAG45114 X P1 (JW0871)   |
| SMR15287 | CAG45114 $\Delta$ <i>pstC758</i> ::FRTKanFRT                                                                               | CAG45114 X P1 (JW3705)   |
| SMR15289 | CAG45114 $\Delta$ <i>phoU755</i> ::FRTKanFRT                                                                               | CAG45114 X P1 (JW3702)   |
| SMR15291 | CAG45114 $\Delta$ <i>znuC783</i> ::FRTKanFRT                                                                               | CAG45114 X P1 (JW1847)   |
| SMR15293 | CAG45114 $\Delta$ <i>cyoD786</i> ::FRTKanFRT                                                                               | CAG45114 X P1 (JW0419)   |
| SMR15295 | CAG45114 $\Delta$ <i>ubiH758</i> ::FRTKanFRT                                                                               | CAG45114 X P1 (JW2875)   |
| SMR15301 | CAG45114 $\Delta$ <i>pstB756</i> ::FRTKanFRT                                                                               | CAG45114 X P1 (JW3703)   |
| SMR15309 | CAG45114 <i>yigP</i> ::Tn10dCam                                                                                            | CAG45114 X P1 (SMR11475) |
| SMR15311 | CAG45114 <i>rpoE2072</i> ::Tn10dCam                                                                                        | CAG45114 X P1 (SMR5236)  |
| SMR15315 | CAG45114 $\Delta$ <i>rppH754</i> ::FRTKanFRT                                                                               | CAG45114 X P1 (JW2798)   |
| SMR15317 | CAG45114 $\Delta$ <i>ubiX732</i> ::FRTKanFRT                                                                               | CAG45114 X P1 (JW2308)   |
| SMR15319 | CAG45114 <i>hemL</i> ::Tn10dCam                                                                                            | CAG45114 X P1 (SMR11478) |
| SMR15321 | CAG45114 <i>ubiA</i> ::Tn10dCam                                                                                            | CAG45114 X P1 (SMR11944) |
| SMR15323 | CAG45114 <i>ubiD</i> ::Tn10dCam                                                                                            | CAG45114 X P1 (SMR11945) |
| SMR15326 | CAG45114 $\Delta$ <i>ygfA763</i> ::FRTKanFRT                                                                               | CAG45114 X P1 (JW2879)   |
| SMR15328 | CAG45114 $\Delta$ <i>apaH761</i> ::FRTKanFRT                                                                               | CAG45114 X P1 (JW0048)   |
| SMR15330 | CAG45114 $\Delta$ <i>cyoA789</i> ::FRTKanFRT                                                                               | CAG45114 X P1 (JW0422)   |
| SMR15354 | CAG45114 $\Delta$ <i>nuoL760</i> ::FRTKanFRT                                                                               | CAG45114 X P1 (JW2273)   |
| SMR15356 | CAG45114 $\Delta$ <i>mdh761</i> ::FRTKanFRT                                                                                | CAG45114 X P1 (JW3205)   |
| SMR15358 | CAG45114 $\Delta$ <i>nuoJ762</i> ::FRTKanFRT                                                                               | CAG45114 X P1 (JW2275)   |
| SMR15360 | CAG45114 $\Delta$ <i>arcA726</i> ::FRTKanFRT                                                                               | CAG45114 X P1 (JW4364)   |
| SMR15362 | CAG45114 $\Delta$ <i>fre784</i> ::FRTKanFRT                                                                                | CAG45114 X P1 (JW3820)   |
| SMR15364 | CAG45114 $\Delta$ <i>arcB738</i> ::FRTKanFRT                                                                               | CAG45114 X P1 (JW5536)   |
| SMR15366 | CAG45114 $\Delta$ <i>nuoK761</i> ::FRTKanFRT                                                                               | CAG45114 X P1 (JW2274)   |
| SMR15754 | CAG45114 $\Delta$ <i>rseA</i> ::FRTKanFRT                                                                                  | CAG45114 X P1 (JW2556)   |
| SMR15962 | SMR6039 $\Delta$ <i>pgi721</i> ::FRTKanFRT                                                                                 | SMR6039 X P1 (JW3985)    |
| SMR15980 | SMR6039 $\Delta$ <i>uvrY760</i> ::FRTKanFRT                                                                                | SMR6039 X P1 (JW1899)    |
| SMR16024 | SMR6039 $\Delta$ <i>recB</i> ::Kan                                                                                         | SMR6039 X P1 (RTC0013)   |
| SMR16032 | MG1655 <i>galk</i> ::P <sub>lac</sub> <i>cfp</i> Amp $\Delta$ <i>apaH761</i> ::FRTKanFRT                                   | SMR14471 X P1 (JW0048)   |
| SMR16038 | CAG45114 <i>nuoG</i> ::Tn10dCam                                                                                            | CAG45114 X P1 (SMR11956) |
| SMR16093 | SMR6039 $\Delta$ <i>recF1804</i> ::FRTKanFRT                                                                               | SMR6039 X P1 (SMR8097)   |
| SMR17043 | SMR6039 <i>recC</i> ::Tn10dCam                                                                                             | SMR6039 X P1 (SMR11941)  |
| SMR17173 | FC36 $\Delta$ <i>araBAD567</i> $\Delta$ <i>attA</i> ::P <sub>BAD</sub> -Scel<br>$\Delta$ <i>speE739</i> ::FRTKanFRT        | SMR10774 X P1 (JW0117)   |
| SMR17174 | SMR17173 $\Delta$ <i>zie3913.1</i> :: <i>tetRtetA</i> +1FRT <i>cat</i> FRT<br>$\Delta$ <i>zie3920.5</i> ::3ChiKanIScelsite | SMR17173 X P1 (SMR10800) |
| SMR17175 | FC36 $\Delta$ <i>araBAD567</i> $\Delta$ <i>attA</i> ::P <sub>BAD</sub> -Scel<br>$\Delta$ <i>fruR786</i> ::FRTKanFRT        | SMR10774 X P1 (JW0078)   |
| SMR17176 | SMR17175 $\Delta$ <i>zie3913.1</i> :: <i>tetRtetA</i> +1FRT <i>cat</i> FRT<br>$\Delta$ <i>zie3920.5</i> ::3ChiKanIScelsite | SMR17175 X P1 (SMR10800) |
| SMR17177 | FC36 $\Delta$ <i>araBAD567</i> $\Delta$ <i>attA</i> ::P <sub>BAD</sub> -Scel<br>$\Delta$ <i>yifE786</i> ::FRTKanFRT        | SMR10774 X P1 (JW3737)   |
| SMR17178 | SMR17177 $\Delta$ <i>zie3913.1</i> :: <i>tetRtetA</i> +1FRT <i>cat</i> FRT<br>$\Delta$ <i>zie3920.5</i> ::3ChiKanIScelsite | SMR17177 X P1 (SMR10800) |
| SMR17179 | FC36 $\Delta$ <i>araBAD567</i> $\Delta$ <i>attA</i> ::P <sub>BAD</sub> -Scel<br>$\Delta$ <i>yqgE723</i> ::FRTKanFRT        | SMR10774 X P1 (JW2915)   |
| SMR17180 | SMR17179 $\Delta$ <i>zie3913.1</i> :: <i>tetRtetA</i> +1FRT <i>cat</i> FRT<br>$\Delta$ <i>zie3920.5</i> ::3ChiKanIScelsite | SMR17179 X P1 (SMR10800) |
| SMR17181 | FC36 $\Delta$ <i>araBAD567</i> $\Delta$ <i>attA</i> ::P <sub>BAD</sub> -Scel<br>$\Delta$ <i>yqiC737</i> ::FRTKanFRT        | SMR10774 X P1 (JW5505)   |
| SMR17182 | SMR17181 $\Delta$ <i>zie3913.1</i> :: <i>tetRtetA</i> +1FRT <i>cat</i> FRT<br>$\Delta$ <i>zie3920.5</i> ::3ChiKanIScelsite | SMR17181 X P1 (SMR10800) |

|          |                                                                                                     |                          |
|----------|-----------------------------------------------------------------------------------------------------|--------------------------|
| SMR17183 | FC36 $\Delta$ <i>araBAD567</i> $\Delta$ attA::P <sub>BAD</sub> -Scel<br>$\Delta$ speD738::FRTKanFRT | SMR10774 X P1 (JW0116)   |
| SMR17184 | SMR17183 $\Delta$ zie3913.1::tetRtetA+1FRTcatFRT<br>$\Delta$ zie3920.5::3ChiKanIscelsite            | SMR17183 X P1 (SMR10800) |
| SMR17185 | FC36 $\Delta$ <i>araBAD567</i> $\Delta$ attA::P <sub>BAD</sub> -Scel<br>$\Delta$ nuoL760::FRTKanFRT | SMR10774 X P1 (JW2273)   |
| SMR17186 | SMR17185 $\Delta$ zie3913.1::tetRtetA+1FRTcatFRT<br>$\Delta$ zie3920.5::3ChiKanIscelsite            | SMR17185 X P1 (SMR10800) |
| SMR17187 | FC36 $\Delta$ <i>araBAD567</i> $\Delta$ attA::P <sub>BAD</sub> -Scel<br>$\Delta$ rbsK781::FRTKanFRT | SMR10774 X P1 (JW3731)   |
| SMR17188 | SMR17187 $\Delta$ zie3913.1::tetRtetA+1FRTcatFRT<br>$\Delta$ zie3920.5::3ChiKanIscelsite            | SMR17187 X P1 (SMR10800) |
| SMR17189 | FC36 $\Delta$ <i>araBAD567</i> $\Delta$ attA::P <sub>BAD</sub> -Scel<br>$\Delta$ pgi721::FRTKanFRT  | SMR10774 X P1 (JW3985)   |
| SMR17190 | SMR17189 $\Delta$ zie3913.1::tetRtetA+1FRTcatFRT<br>$\Delta$ zie3920.5::3ChiKanIscelsite            | SMR17189 X P1 (SMR10800) |
| SMR17191 | FC36 $\Delta$ <i>araBAD567</i> $\Delta$ attA::P <sub>BAD</sub> -Scel<br>$\Delta$ cspC747::FRTKanFRT | SMR10774 X P1 (JW1812)   |
| SMR17192 | SMR17191 $\Delta$ zie3913.1::tetRtetA+1FRTcatFRT<br>$\Delta$ zie3920.5::3ChiKanIscelsite            | SMR17191 X P1 (SMR10800) |
| SMR17193 | FC36 $\Delta$ <i>araBAD567</i> $\Delta$ attA::P <sub>BAD</sub> -Scel<br>$\Delta$ apaH761::FRTKanFRT | SMR10774 X P1 (JW0048)   |
| SMR17194 | SMR17193 $\Delta$ zie3913.1::tetRtetA+1FRTcatFRT<br>$\Delta$ zie3920.5::3ChiKanIscelsite            | SMR17193 X P1 (SMR10800) |
| SMR17195 | FC36 $\Delta$ <i>araBAD567</i> $\Delta$ attA::P <sub>BAD</sub> -Scel<br>$\Delta$ metJ725::FRTKanFRT | SMR10774 X P1 (JW3909)   |
| SMR17196 | SMR17195 $\Delta$ zie3913.1::tetRtetA+1FRTcatFRT<br>$\Delta$ zie3920.5::3ChiKanIscelsite            | SMR17195 X P1 (SMR10800) |
| SMR17197 | FC36 $\Delta$ <i>araBAD567</i> $\Delta$ attA::P <sub>BAD</sub> -Scel<br>$\Delta$ ubiH758::FRTKanFRT | SMR10774 X P1 (JW2875)   |
| SMR17198 | SMR17197 $\Delta$ zie3913.1::tetRtetA+1FRTcatFRT<br>$\Delta$ zie3920.5::3ChiKanIscelsite            | SMR17197 X P1 (SMR10800) |
| SMR17199 | FC36 $\Delta$ <i>araBAD567</i> $\Delta$ attA::P <sub>BAD</sub> -Scel<br>$\Delta$ rppH754::FRTKanFRT | SMR10774 X P1 (JW2798)   |
| SMR17200 | SMR17199 $\Delta$ zie3913.1::tetRtetA+1FRTcatFRT<br>$\Delta$ zie3920.5::3ChiKanIscelsite            | SMR17199 X P1 (SMR10800) |
| SMR17201 | FC36 $\Delta$ <i>araBAD567</i> $\Delta$ attA::P <sub>BAD</sub> -Scel<br>$\Delta$ hscB773::FRTKanFRT | SMR10774 X P1 (JW2511)   |
| SMR17202 | SMR17201 $\Delta$ zie3913.1::tetRtetA+1FRTcatFRT<br>$\Delta$ zie3920.5::3ChiKanIscelsite            | SMR17201 X P1 (SMR10800) |
| SMR17205 | FC36 $\Delta$ <i>araBAD567</i> $\Delta$ attA::P <sub>BAD</sub> -Scel<br>$\Delta$ yjcC755::FRTKanFRT | SMR10774 X P1 (JW4022)   |
| SMR17206 | SMR17205 $\Delta$ zie3913.1::tetRtetA+1FRTcatFRT<br>$\Delta$ zie3920.5::3ChiKanIscelsite            | SMR17205 X P1 (SMR10800) |
| SMR17207 | FC36 $\Delta$ <i>araBAD567</i> $\Delta$ attA::P <sub>BAD</sub> -Scel<br>$\Delta$ barA784::FRTKanFRT | SMR10774 X P1 (JW2757)   |
| SMR17208 | SMR17207 $\Delta$ zie3913.1::tetRtetA+1FRTcatFRT<br>$\Delta$ zie3920.5::3ChiKanIscelsite            | SMR17207X P1 (SMR10800)  |
| SMR17209 | FC36 $\Delta$ <i>araBAD567</i> $\Delta$ attA::P <sub>BAD</sub> -Scel<br>$\Delta$ trxB786::FRTKanFRT | SMR10774 X P1 (JW0871)   |
| SMR17210 | SMR17209 $\Delta$ zie3913.1::tetRtetA+1FRTcatFRT<br>$\Delta$ zie3920.5::3ChiKanIscelsite            | SMR17209X P1 (SMR10800)  |
| SMR17211 | FC36 $\Delta$ <i>araBAD567</i> $\Delta$ attA::P <sub>BAD</sub> -Scel<br>$\Delta$ lon725::FRTKanFRT  | SMR10774 X P1 (JW0429)   |
| SMR17212 | SMR17211 $\Delta$ zie3913.1::tetRtetA+1FRTcatFRT<br>$\Delta$ zie3920.5::3ChiKanIscelsite            | SMR17211X P1 (SMR10800)  |
| SMR17213 | FC36 $\Delta$ <i>araBAD567</i> $\Delta$ attA::P <sub>BAD</sub> -Scel<br>$\Delta$ argR762::FRTKanFRT | SMR10774 X P1 (JW3206)   |
| SMR17214 | SMR17213 $\Delta$ zie3913.1::tetRtetA+1FRTcatFRT<br>$\Delta$ zie3920.5::3ChiKanIscelsite            | SMR17213X P1 (SMR10800)  |
| SMR17215 | FC36 $\Delta$ <i>araBAD567</i> $\Delta$ attA::P <sub>BAD</sub> -Scel                                | SMR10774 X P1 (JW4130)   |



|          |                                                                       |                          |
|----------|-----------------------------------------------------------------------|--------------------------|
|          | <i>Δhfg722::FRTKanFRT</i>                                             |                          |
| SMR17216 | SMR17215 <i>Δzie3913.1::tetRtetA+1FRTcatFRT</i>                       | SMR17215X P1 (SMR10800)  |
|          | <i>Δzie3920.5::3ChiKanIscelsite</i>                                   |                          |
| SMR17217 | FC36 <i>Δ araBAD567 Δattλ::P<sub>BADl</sub>-Scel</i>                  | SMR10774 X P1 (JW3820)   |
|          | <i>Δfre784::FRTKanFRT</i>                                             |                          |
| SMR17218 | SMR17217 <i>Δzie3913.1::tetRtetA+1FRTcatFRT</i>                       | SMR17217X P1 (SMR10800)  |
|          | <i>Δzie3920.5::3ChiKanIscelsite</i>                                   |                          |
| SMR17219 | FC36 <i>Δ araBAD567 Δattλ::P<sub>BADl</sub>-Scel</i>                  | SMR10774 X P1 (JW3619)   |
|          | <i>ΔyicC750::FRTKanFRT</i>                                            |                          |
| SMR17220 | SMR17219 <i>Δzie3913.1::tetRtetA+1FRTcatFRT</i>                       | SMR17219X P1 (SMR10800)  |
|          | <i>Δzie3920.5::3ChiKanIscelsite</i>                                   |                          |
| SMR17221 | FC36 <i>Δ araBAD567 Δattλ::P<sub>BADl</sub>-Scel</i>                  | SMR10774 X P1 (JW5581)   |
|          | <i>ΔubiE778::FRTKanFRT</i>                                            |                          |
| SMR17222 | SMR17221 <i>Δzie3913.1::tetRtetA+1FRTcatFRT</i>                       | SMR17221X P1 (SMR10800)  |
|          | <i>Δzie3920.5::3ChiKanIscelsite</i>                                   |                          |
| SMR17225 | FC36 <i>Δ araBAD567 Δattλ::P<sub>BADl</sub>-Scel</i>                  | SMR10774 X P1 (JW5089)   |
|          | <i>ΔlipB769::FRTKanFRT</i>                                            |                          |
| SMR17226 | SMR17225 <i>Δzie3913.1::tetRtetA+1FRTcatFRT</i>                       | SMR17225X P1 (SMR10800)  |
|          | <i>Δzie3920.5::3ChiKanIscelsite</i>                                   |                          |
| SMR17227 | FC36 <i>Δ araBAD567 Δattλ::P<sub>BADl</sub>-Scel</i>                  | SMR10774 X P1 (JW1181)   |
|          | <i>ΔldcA782::FRTKanFRT</i>                                            |                          |
| SMR17228 | SMR17227 <i>Δzie3913.1::tetRtetA+1FRTcatFRT</i>                       | SMR17227X P1 (SMR10800)  |
|          | <i>Δzie3920.5::3ChiKanIscelsite</i>                                   |                          |
| SMR17229 | FC36 <i>Δ araBAD567 Δattλ::P<sub>BADl</sub>-Scel</i>                  | SMR10774 X P1 (JW3815)   |
|          | <i>ΔtatC781::FRTKanFRT</i>                                            |                          |
| SMR17230 | SMR17229 <i>Δzie3913.1::tetRtetA+1FRTcatFRT</i>                       | SMR17229X P1 (SMR10800)  |
|          | <i>Δzie3920.5::3ChiKanIscelsite</i>                                   |                          |
| SMR17233 | FC36 <i>Δ araBAD567 Δattλ::P<sub>BADl</sub>-Scel</i>                  | SMR10774 X P1 (JW1612)   |
|          | <i>Δmall768::FRTKanFRT</i>                                            |                          |
| SMR17235 | FC36 <i>Δ araBAD567 Δattλ::P<sub>BADl</sub>-Scel</i>                  | SMR10774 X P1 (JW5116)   |
|          | <i>ΔybjT770::FRTKanFRT</i>                                            |                          |
| SMR17234 | SMR17233 <i>Δzie3913.1::tetRtetA+1FRTcatFRT</i>                       | SMR17233X P1 (SMR10800)  |
|          | <i>Δzie3920.5::3ChiKanIscelsite</i>                                   |                          |
| SMR17237 | FC36 <i>Δ araBAD567 Δattλ::P<sub>BADl</sub>-Scel</i>                  | SMR10774 X P1 (JW3205)   |
|          | <i>Δmdh761::FRTKanFRT</i>                                             |                          |
| SMR17238 | SMR17237 <i>Δzie3913.1::tetRtetA+1FRTcatFRT</i>                       | SMR17237X P1 (SMR10800)  |
|          | <i>Δzie3920.5::3ChiKanIscelsite</i>                                   |                          |
| SMR17239 | FC36 <i>Δ araBAD567 Δattλ::P<sub>BADl</sub>-Scel</i>                  | SMR10774 X P1 (JW2879)   |
|          | <i>ΔygfA763::FRTKanFRT</i>                                            |                          |
| SMR17240 | SMR17239 <i>Δzie3913.1::tetRtetA+1FRTcatFRT</i>                       | SMR17239X P1 (SMR10800)  |
|          | <i>Δzie3920.5::3ChiKanIscelsite</i>                                   |                          |
| SMR17241 | FC36 <i>Δ araBAD567 Δattλ::P<sub>BADl</sub>-Scel</i>                  | SMR10774 X P1 (JW5607)   |
|          | <i>ΔhdfR785::FRTKanFRT</i>                                            |                          |
| SMR17242 | SMR17241 <i>Δzie3913.1::tetRtetA+1FRTcatFRT</i>                       | SMR17241X P1 (SMR10800)  |
|          | <i>Δzie3920.5::3ChiKanIscelsite</i>                                   |                          |
| SMR17243 | FC36 <i>Δ araBAD567 Δattλ::P<sub>BADl</sub>-Scel</i>                  | SMR10774 X P1 (JW0440)   |
|          | <i>ΔglnK736::FRTKanFRT</i>                                            |                          |
| SMR17244 | SMR17243 <i>Δzie3913.1::tetRtetA+1FRTcatFRT</i>                       | SMR17243 X P1 (SMR10800) |
|          | <i>Δzie3920.5::3ChiKanIscelsite</i>                                   |                          |
| SMR17245 | FC36 <i>Δ araBAD567 Δattλ::P<sub>BADl</sub>-Scel</i>                  | SMR10774 X P1 (JW5375)   |
|          | <i>ΔnuoC768::FRTKanFRT</i>                                            |                          |
| SMR17246 | SMR17245 <i>Δzie3913.1::tetRtetA+1FRTcatFRT</i>                       | SMR17245 X P1 (SMR10800) |
|          | <i>Δzie3920.5::3ChiKanIscelsite</i>                                   |                          |
| SMR17247 | FC36 <i>Δ araBAD567 Δattλ::P<sub>BADl</sub>-Scel yjL(P)::Tn10dCam</i> | SMR10774 X P1 (SMR11472) |
| SMR17249 | FC36 <i>Δ araBAD567 Δattλ::P<sub>BADl</sub>-Scel yigP::Tn10dCam</i>   | SMR10774 X P1 (SMR11475) |
| SMR17250 | SMR17249 <i>Δzie3913.1::tetRtetA+1FRTcatFRT</i>                       | SMR17249X P1 (SMR10800)  |
|          | <i>Δzie3920.5::3ChiKanIscelsite</i>                                   |                          |
| SMR17253 | FC36 <i>Δ araBAD567 Δattλ::P<sub>BADl</sub>-Scel</i>                  | SMR10774 X P1 (SMR11476) |
|          | <i>ytjB(P)::Tn10dCam</i>                                              |                          |
| SMR17254 | SMR17253 <i>Δzie3913.1::tetRtetA+1FRTcatFRT</i>                       | SMR17253 X P1 (SMR10800) |
|          | <i>Δzie3920.5::3ChiKanIscelsite</i>                                   |                          |

|          |                                                                                                                                                                                                     |                          |
|----------|-----------------------------------------------------------------------------------------------------------------------------------------------------------------------------------------------------|--------------------------|
| SMR17255 | FC36 $\Delta$ <i>araBAD567</i> $\Delta$ att $\lambda$ ::P <sub>BAD</sub> -Scel <i>hemL</i> ::Tn10dCam                                                                                               | SMR10774 X P1 (SMR11478) |
| SMR17256 | SMR17255 $\Delta$ zie3913.1::tetRtetA+1FRTcatFRT<br>$\Delta$ zie3920.5::3ChiKanI Scelsite                                                                                                           | SMR17255 X P1 (SMR10800) |
| SMR17257 | FC36 $\Delta$ <i>araBAD567</i> $\Delta$ att $\lambda$ ::P <sub>BAD</sub> -Scel <i>proL</i> ::Tn10dCam                                                                                               | SMR10774 X P1 (SMR11479) |
| SMR17258 | SMR17257 $\Delta$ zie3913.1::tetRtetA+1FRTcatFRT<br>$\Delta$ zie3920.5::3ChiKanI Scelsite                                                                                                           | SMR17257 X P1 (SMR10800) |
| SMR17259 | SMR4562 $\Delta$ <i>araBAD567</i> $\Delta$ att $\lambda$ ::P <sub>BAD</sub> -Scel<br>$\Delta$ pgi721::FRTKanFRT                                                                                     | SMR6276 X P1 (JW3985)    |
| SMR17261 | SMR4562 $\Delta$ <i>araBAD567</i> $\Delta$ att $\lambda$ ::P <sub>BAD</sub> -Scel<br>$\Delta$ fre784::FRTKanFRT                                                                                     | SMR6276 X P1 (JW3820)    |
| SMR17262 | SMR4562 $\Delta$ <i>araBAD567</i> $\Delta$ att $\lambda$ ::P <sub>BAD</sub> -Scel <i>rpoS</i> ::Tn10<br>$\Delta$ pgi721::FRTKanFRT                                                                  | SMR13448 X P1 (JW3985)   |
| SMR17264 | SMR4562 $\Delta$ <i>araBAD567</i> $\Delta$ att $\lambda$ ::P <sub>BAD</sub> -Scel <i>rpoS</i> ::Tn10<br>$\Delta$ fre784::FRTKanFRT                                                                  | SMR13448 X P1 (JW3820)   |
| SMR17265 | SMR4562 <i>yiaG-yfp</i> FRTcatFRT $\Delta$ barA784::FRTKanFRT                                                                                                                                       | SMR10582 X P1 (JW2757)   |
| SMR17267 | SMR4562 <i>yiaG-yfp</i> FRTcatFRT $\Delta$ uvrY760::FRTKanFRT                                                                                                                                       | SMR10582 X P1 (JW1899)   |
| SMR17270 | SMR4562 $\Delta$ <i>araBAD567</i> $\Delta$ att $\lambda$ ::P <sub>BAD</sub> -Scel<br>$\Delta$ hscB773::FRTKanFRT                                                                                    | SMR6276 X P1 (JW2511)    |
| SMR17272 | SMR4562 $\Delta$ <i>araBAD567</i> $\Delta$ att $\lambda$ ::P <sub>BAD</sub> -Scel <i>rpoS</i> ::Tn10<br>$\Delta$ hscB773::FRTKanFRT                                                                 | SMR13448 X P1 (JW2511)   |
| SMR17274 | SMR4562 $\Delta$ <i>araBAD567</i> $\Delta$ att $\lambda$ ::P <sub>BAD</sub> -Scel $\Delta$ pgi721::FRT                                                                                              | SMR17259 X pCP20         |
| SMR17275 | SMR4562 $\Delta$ <i>araBAD567</i> $\Delta$ att $\lambda$ ::P <sub>BAD</sub> -Scel <i>rpoS</i> ::Tn10<br>$\Delta$ pgi721::FRT                                                                        | SMR17262 X pCP20         |
| SMR17276 | SMR4562 $\Delta$ <i>araBAD567</i> $\Delta$ att $\lambda$ ::P <sub>BAD</sub> -Scel $\Delta$ fre784::FRT                                                                                              | SMR17261 X pCP20         |
| SMR17277 | SMR4562 $\Delta$ <i>araBAD567</i> $\Delta$ att $\lambda$ ::P <sub>BAD</sub> -Scel <i>rpoS</i> ::Tn10<br>$\Delta$ fre784::FRT                                                                        | SMR17264 X pCP20         |
| SMR17282 | SMR4562 $\Delta$ <i>araBAD567</i> $\Delta$ att $\lambda$ ::P <sub>BAD</sub> -Scel<br><i>recA</i> ::Tn10dCam                                                                                         | SMR6276 X P1 (SMR4610)   |
| SMR17286 | SMR4562 <i>yiaG-yfp</i> FRTcatFRT $\Delta$ crp765::FRTKanFRT                                                                                                                                        | SMR0582 X P1 (JW3320)    |
| SMR17290 | SMR4562 $\Delta$ crp765::FRTKanFRT                                                                                                                                                                  | SMR4562 X P1 (JW3320)    |
| SMR17291 | SMR4562 $\Delta$ <i>araBAD567</i> $\Delta$ att $\lambda$ ::P <sub>BAD</sub> -Scel [F'<br><i>codA21</i> ::mini-Tn7Kan(I-Scel site) $\Delta$ tral::dhfR]<br><i>hemL</i> ::Tn10dCam                    | SMR6038 X P1 (SMR11478)  |
| SMR17293 | SMR4562 $\Delta$ <i>araBAD567</i> $\Delta$ att $\lambda$ ::P <sub>BAD</sub> -Scel <i>rpoS</i> ::Tn10 [F'<br><i>codA21</i> ::mini-Tn7Kan(I-Scel site) $\Delta$ tral::dhfR]<br><i>hemL</i> ::Tn10dCam | SMR11437 X P1 (SMR11478) |
| SMR17295 | SMR4562 $\Delta$ <i>araBAD567</i> $\Delta$ att $\lambda$ ::P <sub>BAD</sub> -Scel<br>$\Delta$ hscB773::FRT                                                                                          | SMR17270 X pCP20         |
| SMR17296 | SMR4562 $\Delta$ <i>araBAD567</i> $\Delta$ att $\lambda$ ::P <sub>BAD</sub> -Scel <i>rpoS</i> ::Tn10<br>$\Delta$ hscB773::FRT                                                                       | SMR17272 X pCP20         |
| SMR17297 | SMR4562 $\Delta$ <i>araBAD567</i> $\Delta$ att $\lambda$ ::P <sub>BAD</sub> -Scel $\Delta$ fre784::FRT<br>[F' <i>codA21</i> ::mini-Tn7Kan(I-Scel site) $\Delta$ tral::dhfR]                         | SMR17276 X P1 (SMR6308)  |
| SMR17299 | SMR4562 $\Delta$ <i>araBAD567</i> $\Delta$ att $\lambda$ ::P <sub>BAD</sub> -Scel <i>rpoS</i> ::Tn10<br>$\Delta$ fre784::FRT [F' <i>codA21</i> ::mini-Tn7Kan(I-Scel site)<br>$\Delta$ tral::dhfR]   | SMR17277 X P1 (SMR6308)  |
| SMR17301 | SMR4562 $\Delta$ <i>araBAD567</i> $\Delta$ att $\lambda$ ::P <sub>BAD</sub> -Scel<br><i>sdhD</i> ::Tn10dCam [F' <i>codA21</i> ::mini-Tn7Kan(I-Scel site)<br>$\Delta$ tral::dhfR]                    | SMR6308 X P1 (SMR11530)  |
| SMR17370 | SMR4562 $\Delta$ <i>araBAD567</i> $\Delta$ att $\lambda$ ::P <sub>BAD</sub> -Scel $\Delta$ pgi721::FRT<br>[F' <i>codA21</i> ::mini-Tn7Kan(I-Scel site) $\Delta$ tral::dhfR]                         | SMR17274 X P1 (SMR6308)  |
| SMR17372 | SMR4562 $\Delta$ <i>araBAD567</i> $\Delta$ att $\lambda$ ::P <sub>BAD</sub> -Scel <i>rpoS</i> ::Tn10<br>$\Delta$ pgi721::FRT [F' <i>codA21</i> ::mini-Tn7Kan(I-Scel site)<br>$\Delta$ tral::dhfR]   | SMR17275 X P1 (SMR6308)  |
| SMR17374 | SMR4562 $\Delta$ ara <i>araBAD567</i> $\Delta$ att $\lambda$ ::P <sub>BAD</sub> -Scel<br>$\Delta$ hscB773::FRT [F' <i>codA21</i> ::mini-Tn7Kan(I-Scel site)<br>$\Delta$ tral::dhfR]                 | SMR17295 X P1 (SMR6308)  |
| SMR17376 | SMR4562 $\Delta$ <i>araBAD567</i> $\Delta$ att $\lambda$ ::P <sub>BAD</sub> -Scel <i>rpoS</i> ::Tn10<br>$\Delta$ hscB773::FRT [F' <i>codA21</i> ::mini-Tn7Kan(I-Scel site)                          | SMR17296 X P1 (SMR6308)  |

|          |                                                                                                                                                           |                          |
|----------|-----------------------------------------------------------------------------------------------------------------------------------------------------------|--------------------------|
|          | <i>Δtral::dhfR</i>                                                                                                                                        |                          |
| SMR17385 | SMR4562 <i>Δ araBAD567 Δattλ::P<sub>BADl</sub>-Scel rpoS::Tn10 [F<sup>+</sup> codA21::mini-Tn7Kan(l-Scel site ) Δtral::dhfR]</i><br><i>sdhD::Tn10dCam</i> | SMR11437 X P1 (SMR11530) |
| SMR17506 | FC36 <i>Δ araBAD567 Δattλ::P<sub>BADl</sub>-Scel ppk::Tn10dCam</i>                                                                                        | SMR10774 X P1 (SMR11955) |
| SMR17507 | SMR17506 <i>Δzie3913.1::tetRtetA+1FRTcatFRT</i><br><i>Δzie3920.5::3ChiKanlScelsite</i>                                                                    | SMR17506 X P1 (SMR10800) |
| SMR17508 | FC36 <i>Δ araBAD567 Δattλ::P<sub>BADl</sub>-Scel</i><br><i>groES(P)::Tn10dCam</i>                                                                         | SMR10774 X P1 (SMR11934) |
| SMR17509 | SMR17508 <i>Δzie3913.1::tetRtetA+1FRTcatFRT</i><br><i>Δzie3920.5::3ChiKanlScelsite</i>                                                                    | SMR17508 X P1 (SMR10800) |
| SMR17520 | FC36 <i>Δ araBAD567 Δattλ::P<sub>BADl</sub>-Scel</i><br><i>ΔihfA786::FRTKanFRT</i>                                                                        | SMR10774 X P1 (JW1702)   |
| SMR17521 | SMR17520 <i>Δzie3913.1::tetRtetA+1FRTcatFRT</i><br><i>Δzie3920.5::3ChiKanlScelsite</i>                                                                    | SMR17520 X P1 (SMR10800) |
| SMR17526 | FC36 <i>Δ araBAD567 Δattλ::P<sub>BADl</sub>-Scel</i><br><i>ΔacrA748::FRTKanFRT</i>                                                                        | SMR10774 X P1 (JW0452)   |
| SMR17527 | SMR17526 <i>Δzie3913.1::tetRtetA+1FRTcatFRT</i><br><i>Δzie3920.5::3ChiKanlScelsite</i>                                                                    | SMR17526 X P1 (SMR10800) |
| SMR17528 | FC36 <i>Δ araBAD567 Δattλ::P<sub>BADl</sub>-Scel</i><br><i>ΔacrB747::FRTKanFRT</i>                                                                        | SMR10774 X P1 (JW0451)   |
| SMR17529 | SMR17528 <i>Δzie3913.1::tetRtetA+1FRTcatFRT</i><br><i>Δzie3920.5::3ChiKanlScelsite</i>                                                                    | SMR17528 X P1 (SMR10800) |
| SMR17534 | FC36 <i>Δ araBAD567 Δattλ::P<sub>BADl</sub>-Scel</i><br><i>ΔarcA726::FRTKanFRT</i>                                                                        | SMR10774 X P1 (JW4364)   |
| SMR17535 | SMR17534 <i>Δzie3913.1::tetRtetA+1FRTcatFRT</i><br><i>Δzie3920.5::3ChiKanlScelsite</i>                                                                    | SMR17534 X P1 (SMR10800) |
| SMR17536 | FC36 <i>Δ araBAD567 Δattλ::P<sub>BADl</sub>-Scel</i><br><i>Δlrp787::FRTKanFRT</i>                                                                         | SMR10774 X P1 (JW0872)   |
| SMR17537 | SMR17536 <i>Δzie3913.1::tetRtetA+1FRTcatFRT</i><br><i>Δzie3920.5::3ChiKanlScelsite</i>                                                                    | SMR17536 X P1 (SMR10800) |
| SMR17538 | FC36 <i>Δ araBAD567 Δattλ::P<sub>BADl</sub>-Scel</i><br><i>ΔphoU755::FRTKanFRT</i>                                                                        | SMR10774 X P1 (JW3702)   |
| SMR17539 | SMR17538 <i>Δzie3913.1::tetRtetA+1FRTcatFRT</i><br><i>Δzie3920.5::3ChiKanlScelsite</i>                                                                    | SMR17538 X P1 (SMR10800) |
| SMR17540 | FC36 <i>Δ araBAD567 Δattλ::P<sub>BADl</sub>-Scel</i><br><i>ΔpstB756::FRTKanFRT</i>                                                                        | SMR10774 X P1 (JW3703)   |
| SMR17541 | SMR17540 <i>Δzie3913.1::tetRtetA+1FRTcatFRT</i><br><i>Δzie3920.5::3ChiKanlScelsite</i>                                                                    | SMR17540 X P1 (SMR10800) |
| SMR17542 | FC36 <i>Δ araBAD567 Δattλ::P<sub>BADl</sub>-Scel</i><br><i>ΔpstC758::FRTKanFRT</i>                                                                        | SMR10774 X P1 (JW3705)   |
| SMR17543 | SMR17542 <i>Δzie3913.1::tetRtetA+1FRTcatFRT</i><br><i>Δzie3920.5::3ChiKanlScelsite</i>                                                                    | SMR17542 X P1 (SMR10800) |
| SMR17544 | FC36 <i>Δ araBAD567Δattλ::P<sub>BADl</sub>-Scel</i><br><i>ΔznuC783::FRTKanFRT</i>                                                                         | SMR10774 X P1 (JW1847)   |
| SMR17545 | SMR17544 <i>Δzie3913.1::tetRtetA+1FRTcatFRT</i><br><i>Δzie3920.5::3ChiKanlScelsite</i>                                                                    | SMR17544 X P1 (SMR10800) |
| SMR17546 | FC36 <i>Δ araBAD567 Δattλ::P<sub>BADl</sub>-Scel</i><br><i>cysD(P)::Tn10dCam</i>                                                                          | SMR10774 X P1 (SMR11925) |
| SMR17547 | SMR17546 <i>Δzie3913.1::tetRtetA+1FRTcatFRT</i><br><i>Δzie3920.5::3ChiKanlScelsite</i>                                                                    | SMR17546 X P1 (SMR10800) |
| SMR17551 | FC36 <i>Δ araBAD567Δattλ::P<sub>BADl</sub>-Scel</i><br><i>ΔsdhB774::FRTKanFRT</i>                                                                         | SMR10774 X P1 (JW0714)   |
| SMR17552 | SMR17551 <i>Δzie3913.1::tetRtetA+1FRTcatFRT</i><br><i>Δzie3920.5::3ChiKanlScelsite</i>                                                                    | SMR17551 X P1 (SMR10800) |
| SMR17554 | FC36 <i>Δ araBAD567 Δattλ::P<sub>BADl</sub>-Scel</i><br><i>ΔznuA782::FRTKanFRT</i>                                                                        | SMR10774 X P1 (JW5831)   |
| SMR17555 | SMR17554 <i>Δzie3913.1::tetRtetA+1FRTcatFRT</i><br><i>Δzie3920.5::3ChiKanlScelsite</i>                                                                    | SMR17554 X P1 (SMR10800) |
| SMR17562 | FC36 <i>Δ araBAD567 Δattλ::P<sub>BADl</sub>-Scel</i><br><i>ΔtreR788::FRTKanFRT</i>                                                                        | SMR10774 X P1 (JW4200)   |

|          |                                                                                                                                                                           |                                                                      |
|----------|---------------------------------------------------------------------------------------------------------------------------------------------------------------------------|----------------------------------------------------------------------|
| SMR17568 | FC36 $\Delta$ <i>araBAD567</i> $\Delta$ att $\lambda$ ::P <sub>BADl</sub> -Scel<br>$\Delta$ <i>prc755</i> ::FRTKanFRT                                                     | SMR10774 X P1 (JW1819)                                               |
| SMR17578 | FC36 $\Delta$ <i>araBAD567</i> $\Delta$ att $\lambda$ ::P <sub>BADl</sub> -Scel<br>$\Delta$ <i>dsbA723</i> ::FRTKanFRT                                                    | SMR10774 X P1 (JW3832)                                               |
| SMR17599 | FC36 $\Delta$ <i>araBAD567</i> $\Delta$ att $\lambda$ ::P <sub>BADl</sub> -Scel<br>$\Delta$ <i>cyoA789</i> ::FRTKanFRT                                                    | SMR10774 X P1 (JW0422)                                               |
| SMR17601 | SMR17599 $\Delta$ <i>zie3913.1::tetRtetA+1FRTcat</i> FRT<br>$\Delta$ <i>zie3920.5::3ChiKanI</i> Scelsite                                                                  | SMR17599 X P1 (SMR10800)                                             |
| SMR18004 | FC36 $\Delta$ <i>araBAD567</i> $\Delta$ att $\lambda$ ::P <sub>BADl</sub> -Scel <i>lexA3</i> (Ind <sup>-</sup> )<br><i>malB::Tn9</i>                                      | SMR10774 X P1 (SMR820)                                               |
| SMR18010 | FC36 $\Delta$ <i>araBAD567</i> $\Delta$ att $\lambda$ ::P <sub>BADl</sub> -Scel<br>$\Delta$ <i>dinB50</i> ::FRTKanFRT                                                     | SMR10774 X P1 (SMR5889)                                              |
| SMR18013 | FC36 $\Delta$ <i>araBAD567</i> $\Delta$ att $\lambda$ ::P <sub>BADl</sub> -Scel <i>rpoS::Tn10</i>                                                                         | SMR10774 X P1 (SMR6541)                                              |
| SMR18018 | SMR5833 $\Delta$ <i>zfa2334.5::FRTcat</i> FRTI Scelsite                                                                                                                   | SMR5833 x Short homology<br>from pKD3 using primer P531<br>and P533  |
| SMR18020 | SMR5833 $\Delta$ <i>zfa2334.5::FRTKanFRT</i> I Scelsite                                                                                                                   | SMR5833 x Short homology<br>from pKD4 using primer P531<br>and P533) |
| SMR18022 | SMR10772 $\Delta$ <i>zfa2334.5::FRTKanFRT</i> I Scelsite                                                                                                                  | SMR10772 X P1 (SMR18020)                                             |
| SMR18024 | FC36 $\Delta$ <i>araBAD567</i> $\Delta$ att $\lambda$ ::P <sub>BADl</sub> -Scel<br>$\Delta$ <i>zfa2334.5::FRTKanFRT</i> I Scelsite                                        | SMR10774 X P1 (SMR18020)                                             |
| SMR18025 | SMR10772 $\Delta$ <i>zfa2334.5::FRTcat</i> FRTI Scelsite                                                                                                                  | SMR10772 X P1 (SMR18018)                                             |
| SMR18026 | FC36 $\Delta$ <i>araBAD567</i> $\Delta$ att $\lambda$ ::P <sub>BADl</sub> -Scel<br>$\Delta$ <i>zfa2334.5::FRTcat</i> FRTI Scelsite                                        | SMR10774 X P1 (SMR18018)                                             |
| SMR18034 | FC36 $\Delta$ <i>araBAD567</i> $\Delta$ att $\lambda$ ::P <sub>BADl</sub> -Scel $\Delta$ <i>umuDC::cat</i>                                                                | SMR10774 X P1 (SMR3525)                                              |
| SMR18038 | FC36 $\Delta$ <i>araBAD567</i> $\Delta$ att $\lambda$ ::P <sub>BADl</sub> -Scel<br>$\Delta$ <i>cyoA789</i> ::FRTKanFRT<br>$\Delta$ <i>zfa2334.5::FRTcat</i> FRTI Scelsite | SMR17599 X P1 (SMR18018)                                             |
| SMR18040 | FC36 $\Delta$ <i>araBAD567</i> $\Delta$ att $\lambda$ ::P <sub>BADl</sub> -Scel                                                                                           | SMR17189 X P1 (SMR18018)                                             |
| SMR18042 | $\Delta$ <i>pgi721::FRTKanFRT</i> $\Delta$ <i>zfa2334.5::FRTcat</i> FRTI Scelsite                                                                                         |                                                                      |
| SMR18042 | FC36 $\Delta$ <i>araBAD567</i> $\Delta$ att $\lambda$ ::P <sub>BADl</sub> -Scel<br>$\Delta$ <i>lrp787::FRTKanFRT</i> $\Delta$ <i>zfa2334.5::FRTcat</i> FRTI Scelsite      | SMR17536 X P1 (SMR18018)                                             |
| SMR18043 | FC36 $\Delta$ <i>araBAD567</i> $\Delta$ att $\lambda$ ::P <sub>BADl</sub> -Scel<br>$\Delta$ <i>znuC783::FRTKanFRT</i><br>$\Delta$ <i>zfa2334.5::FRTcat</i> FRTI Scelsite  | SMR17544 X P1 (SMR18018)                                             |
| SMR18044 | FC36 $\Delta$ <i>araBAD567</i> $\Delta$ att $\lambda$ ::P <sub>BADl</sub> -Scel<br>$\Delta$ <i>metJ725::FRTKanFRT</i><br>$\Delta$ <i>zfa2334.5::FRTcat</i> FRTI Scelsite  | SMR17195 X P1 (SMR18018)                                             |
| SMR18045 | FC36 $\Delta$ <i>araBAD567</i> $\Delta$ att $\lambda$ ::P <sub>BADl</sub> -Scel<br>$\Delta$ <i>sdhB774::FRTKanFRT</i><br>$\Delta$ <i>zfa2334.5::FRTcat</i> FRTI Scelsite  | SMR17551 X P1 (SMR18018)                                             |
| SMR18046 | FC36 $\Delta$ <i>araBAD567</i> $\Delta$ att $\lambda$ ::P <sub>BADl</sub> -Scel<br>$\Delta$ <i>prc755::FRTKanFRT</i> $\Delta$ <i>zfa2334.5::FRTcat</i> FRTI Scelsite      | SMR17568 X P1 (SMR18018)                                             |
| SMR18053 | FC36 $\Delta$ <i>araBAD567</i> $\Delta$ att $\lambda$ ::P <sub>BADl</sub> -Scel<br>$\Delta$ <i>dsbA723::FRTKanFRT</i><br>$\Delta$ <i>zfa2334.5::FRTcat</i> FRTI Scelsite  | SMR17578 X P1 (SMR18018)                                             |
| SMR18054 | FC36 $\Delta$ <i>araBAD567</i> $\Delta$ att $\lambda$ ::P <sub>BADl</sub> -Scel<br>$\Delta$ <i>arcA726::FRTKanFRT</i><br>$\Delta$ <i>zfa2334.5::FRTcat</i> FRTI Scelsite  | SMR17534 X P1 (SMR18018)                                             |
| SMR18055 | FC36 $\Delta$ <i>araBAD567</i> $\Delta$ att $\lambda$ ::P <sub>BADl</sub> -Scel<br>$\Delta$ <i>treR788::FRTKanFRT</i><br>$\Delta$ <i>zfa2334.5::FRTcat</i> FRTI Scelsite  | SMR17562 X P1 (SMR18018)                                             |
| SMR18056 | FC36 $\Delta$ <i>araBAD567</i> $\Delta$ att $\lambda$ ::P <sub>BADl</sub> -Scel<br>$\Delta$ <i>ihfA786::FRTKanFRT</i> $\Delta$ <i>zfa2334.5::FRTcat</i> FRTI Scelsite     | SMR17520 X P1 (SMR18018)                                             |
| SMR18061 | FC36 $\Delta$ <i>araBAD567</i> $\Delta$ att $\lambda$ ::P <sub>BADl</sub> -Scel<br>$\Delta$ <i>hscB773::FRTKanFRT</i><br>$\Delta$ <i>zfa2334.5::FRTcat</i> FRTI Scelsite  | SMR17201 X P1 (SMR18018)                                             |
| SMR18062 | FC36 $\Delta$ <i>araBAD567</i> $\Delta$ att $\lambda$ ::P <sub>BADl</sub> -Scel<br>$\Delta$ <i>rppH754::FRTKanFRT</i><br>$\Delta$ <i>zfa2334.5::FRTcat</i> FRTI Scelsite  | SMR17199 X P1 (SMR18018)                                             |

|          |                                                                                                                                                          |                          |
|----------|----------------------------------------------------------------------------------------------------------------------------------------------------------|--------------------------|
| SMR18064 | FC36 $\Delta$ <i>araBAD567</i> $\Delta$ att $\lambda$ ::P <sub>BADl</sub> -Scel<br>$\Delta$ trxB786::FRTKanFRT $\Delta$ zfa2334.5::FRTcatFRTIScelsite    | SMR17209 X P1 (SMR18018) |
| SMR18065 | FC36 $\Delta$ <i>araBAD567</i> $\Delta$ att $\lambda$ ::P <sub>BADl</sub> -Scel<br>$\Delta$ speE739::FRTKanFRT<br>$\Delta$ zfa2334.5::FRTcatFRTIScelsite | SMR17173X P1 (SMR18018)  |
| SMR18066 | FC36 $\Delta$ <i>araBAD567</i> $\Delta$ att $\lambda$ ::P <sub>BADl</sub> -Scel<br>$\Delta$ hfq722::FRTKanFRT $\Delta$ zfa2334.5::FRTcatFRTIScelsite     | SMR17215 X P1 (SMR18018) |
| SMR18067 | FC36 $\Delta$ <i>araBAD567</i> $\Delta$ att $\lambda$ ::P <sub>BADl</sub> -Scel<br>$\Delta$ yicC750::FRTKanFRT<br>$\Delta$ zfa2334.5::FRTcatFRTIScelsite | SMR17219 X P1 (SMR18018) |
| SMR18068 | FC36 $\Delta$ <i>araBAD567</i> $\Delta$ att $\lambda$ ::P <sub>BADl</sub> -Scel<br>$\Delta$ nuoC768::FRTKanFRT<br>$\Delta$ zfa2334.5::FRTcatFRTIScelsite | SMR17245 X P1 (SMR18018) |
| SMR18069 | FC36 $\Delta$ <i>araBAD567</i> $\Delta$ att $\lambda$ ::P <sub>BADl</sub> -Scel<br>$\Delta$ barA784::FRTKanFRT<br>$\Delta$ zfa2334.5::FRTcatFRTIScelsite | SMR17207 X P1 (SMR18018) |
| SMR18070 | FC36 $\Delta$ <i>araBAD567</i> $\Delta$ att $\lambda$ ::P <sub>BADl</sub> -Scel<br>$\Delta$ hdfR785::FRTKanFRT<br>$\Delta$ zfa2334.5::FRTcatFRTIScelsite | SMR17241 X P1 (SMR18018) |
| SMR18071 | FC36 $\Delta$ <i>araBAD567</i> $\Delta$ att $\lambda$ ::P <sub>BADl</sub> -Scel<br>$\Delta$ glnK736::FRTKanFRT<br>$\Delta$ zfa2334.5::FRTcatFRTIScelsite | SMR17243 X P1 (SMR18018) |
| SMR18072 | FC36 $\Delta$ <i>araBAD567</i> $\Delta$ att $\lambda$ ::P <sub>BADl</sub> -Scel<br>$\Delta$ yjcC755::FRTKanFRT<br>$\Delta$ zfa2334.5::FRTcatFRTIScelsite | SMR17205 X P1 (SMR18018) |
| SMR18073 | FC36 $\Delta$ <i>araBAD567</i> $\Delta$ att $\lambda$ ::P <sub>BADl</sub> -Scel<br>$\Delta$ yqiC737::FRTKanFRT<br>$\Delta$ zfa2334.5::FRTcatFRTIScelsite | SMR17181 X P1 (SMR18018) |
| SMR18074 | FC36 $\Delta$ <i>araBAD567</i> $\Delta$ att $\lambda$ ::P <sub>BADl</sub> -Scel<br>$\Delta$ cspC747::FRTKanFRT<br>$\Delta$ zfa2334.5::FRTcatFRTIScelsite | SMR17191 X P1 (SMR18018) |
| SMR18075 | FC36 $\Delta$ <i>araBAD567</i> $\Delta$ att $\lambda$ ::P <sub>BADl</sub> -Scel<br>$\Delta$ argR762::FRTKanFRT<br>$\Delta$ zfa2334.5::FRTcatFRTIScelsite | SMR17213 X P1 (SMR18018) |
| SMR18076 | FC36 $\Delta$ <i>araBAD567</i> $\Delta$ att $\lambda$ ::P <sub>BADl</sub> -Scel<br>$\Delta$ speD738::FRTKanFRT<br>$\Delta$ zfa2334.5::FRTcatFRTIScelsite | SMR17183 X P1 (SMR18018) |
| SMR18077 | FC36 $\Delta$ <i>araBAD567</i> $\Delta$ att $\lambda$ ::P <sub>BADl</sub> -Scel<br>$\Delta$ yifE786::FRTKanFRT $\Delta$ zfa2334.5::FRTcatFRTIScelsite    | SMR17177 X P1 (SMR18018) |
| SMR18078 | FC36 $\Delta$ <i>araBAD567</i> $\Delta$ att $\lambda$ ::P <sub>BADl</sub> -Scel<br>$\Delta$ rbsK781::FRTKanFRT<br>$\Delta$ zfa2334.5::FRTcatFRTIScelsite | SMR17187 X P1 (SMR18018) |
| SMR18079 | FC36 $\Delta$ <i>araBAD567</i> $\Delta$ att $\lambda$ ::P <sub>BADl</sub> -Scel <i>yigP</i> ::Tn10dCam<br>$\Delta$ zfa2334.5::FRTKanFRTIScelsite         | SMR17249 X P1 (SMR18020) |
| SMR18080 | FC36 $\Delta$ <i>araBAD567</i> $\Delta$ att $\lambda$ ::P <sub>BADl</sub> -Scel<br>$\Delta$ ldcA782::FRTKanFRT<br>$\Delta$ zfa2334.5::FRTcatFRTIScelsite | SMR17227 X P1 (SMR18018) |
| SMR18081 | FC36 $\Delta$ <i>araBAD567</i> $\Delta$ att $\lambda$ ::P <sub>BADl</sub> -Scel<br>$\Delta$ mall768::FRTKanFRT<br>$\Delta$ zfa2334.5::FRTcatFRTIScelsite | SMR17233 X P1 (SMR18108) |
| SMR18082 | FC36 $\Delta$ <i>araBAD567</i> $\Delta$ att $\lambda$ ::P <sub>BADl</sub> -Scel<br>$\Delta$ ygfA763::FRTKanFRT<br>$\Delta$ zfa2334.5::FRTcatFRTIScelsite | SMR17239 X P1 (SMR18108) |
| SMR18083 | FC36 $\Delta$ <i>araBAD567</i> $\Delta$ att $\lambda$ ::P <sub>BADl</sub> -Scel<br>$\Delta$ lon725::FRTKanFRT $\Delta$ zfa2334.5::FRTcatFRTIScelsite     | SMR17211 X P1 (SMR18108) |
| SMR18084 | FC36 $\Delta$ <i>araBAD567</i> $\Delta$ att $\lambda$ ::P <sub>BADl</sub> -Scel<br>$\Delta$ tatC781::FRTKanFRT<br>$\Delta$ zfa2334.5::FRTcatFRTIScelsite | SMR17229 X P1 (SMR18108) |
| SMR18085 | FC36 $\Delta$ <i>araBAD567</i> $\Delta$ att $\lambda$ ::P <sub>BADl</sub> -Scel<br>$\Delta$ ybjT770::FRTKanFRT                                           | SMR17235 X P1 (SMR18018) |

|                   |                                                                                                                                                                       |                          |
|-------------------|-----------------------------------------------------------------------------------------------------------------------------------------------------------------------|--------------------------|
| SMR18087          | $\Delta zfa2334.5::FRTcatFRTIScelsite$<br>FC36 $\Delta araBAD567 \Delta att\lambda::P_{BADl}-Scel$<br>$\Delta fre784::FRTKanFRT \Delta zfa2334.5::FRTcatFRTIScelsite$ | SMR17217 X P1 (SMR18018) |
| SMR18088          | FC36 $\Delta araBAD567 \Delta att\lambda::P_{BADl}-Scel$<br>$\Delta mdh761::FRTKanFRT$<br>$\Delta zfa2334.5::FRTcatFRTIScelsite$                                      | SMR17237 X P1 (SMR18018) |
| SMR18089          | FC36 $\Delta araBAD567 \Delta att\lambda::P_{BADl}-Scel$<br>$\Delta apaH761::FRTKanFRT$<br>$\Delta zfa2334.5::FRTcatFRTIScelsite$                                     | SMR17193 X P1 (SMR18018) |
| SMR18092          | FC36 $\Delta araBAD567 \Delta att\lambda::P_{BADl}-Scel$<br>$\Delta dinB50::FRTKanFRT \Delta zfa2334.5::FRTcatFRTIScelsite$                                           | SMR18010 X P1 (SMR18018) |
| SMR18093          | FC36 $\Delta araBAD567 \Delta att\lambda::P_{BADl}-Scel$<br>$ytjB(P)::Tn10dCam \Delta zfa2334.5::FRTKanFRTIScelsite$                                                  | SMR17253 X P1 (SMR18020) |
| SMR18094          | FC36 $\Delta araBAD567 \Delta att\lambda::P_{BADl}-Scel \Delta umuDC::cat$<br>$\Delta zfa2334.5::FRTKanFRTIScelsite$                                                  | SMR18034 X P1 (SMR18020) |
| SMR18095          | FC36 $\Delta araBAD567 \Delta att\lambda::P_{BADl}-Scel lexA3(Ind^r)$<br>$malB::Tn9 \Delta zfa2334.5::FRTKanFRTIScelsite$                                             | SMR18004 X P1 (SMR18020) |
| SMR18096          | FC36 $\Delta araBAD567 \Delta att\lambda::P_{BADl}-Scel$<br>$groES(P)::Tn10dCam \Delta zfa2334.5::FRTKanFRTIScelsite$                                                 | SMR17508 X P1 (SMR18020) |
| SMR18097          | FC36 $\Delta araBAD567 \Delta att\lambda::P_{BADl}-Scel proL::Tn10dCam$<br>$\Delta zfa2334.5::FRTKanFRTIScelsite$                                                     | SMR17257 X P1 (SMR18020) |
| SMR18098          | FC36 $\Delta araBAD567 \Delta att\lambda::P_{BADl}-Scel$<br>$cysD(P)::Tn10dCam \Delta zfa2334.5::FRTKanFRTIScelsite$                                                  | SMR17546 X P1 (SMR18020) |
| SMR18100          | FC36 $\Delta araBAD567 \Delta att\lambda::P_{BADl}-Scel yjL(P)::Tn10dCam$<br>$\Delta zfa2334.5::FRTKanFRTIScelsite$                                                   | SMR17247 X P1 (SMR18020) |
| SMR18102          | FC36 $\Delta araBAD567 \Delta att\lambda::P_{BADl}-Scel$<br>$\Delta zfa2334.5::FRTKanFRTIScelsite recA::Tn10dCam$                                                     | SMR18024 X P1 (SMR4610)  |
| SMR18103          | FC36 $\Delta araBAD567 \Delta att\lambda::P_{BADl}-Scel rpoS::Tn10$<br>$\Delta zfa2334.5::FRTcatFRTIScelsite$                                                         | SMR18013 X P1 (SMR18018) |
| SMR18105          | FC36 $\Delta araBAD567 \Delta att\lambda::P_{BADl}-Scel$<br>$\Delta zfa2334.5::FRTKanFRTIScelsite ppk::Tn10dCam$                                                      | SMR18024 X P1 (SMR11955) |
| SMR18108          | FC36 $\Delta araBAD567 \Delta att\lambda::P_{BADl}-Scel$<br>$\Delta zfa2334.5::FRTcatFRTIScelsite$<br>$\Delta ubiE778::FRTKanFRT$                                     | SMR18026 X P1 (JW5581)   |
| SMR18109          | FC36 $\Delta araBAD567 \Delta att\lambda::P_{BADl}-Scel$<br>$\Delta zfa2334.5::FRTcatFRTIScelsite$<br>$\Delta recB745::FRTKanFRT$                                     | SMR18026 X P1 (JW2788)   |
| SMR18110          | FC36 $\Delta araBAD567 \Delta att\lambda::P_{BADl}-Scel$<br>$\Delta zfa2334.5::FRTcatFRTIScelsite$<br>$\Delta yqgE763::FRTKanFRT$                                     | SMR18026 X P1 (JW2915)   |
| SMR18111          | FC36 $\Delta araBAD567 \Delta att\lambda::P_{BADl}-Scel$<br>$\Delta zfa2334.5::FRTcatFRTIScelsite$<br>$\Delta fruR786::FRTKanFRT$                                     | SMR18026 X P1 (JW0078)   |
| SMR18113          | FC36 $\Delta araBAD567 \Delta att\lambda::P_{BADl}-Scel$<br>$\Delta zfa2334.5::FRTcatFRTIScelsite$<br>$\Delta acrB747::FRTKanFRT$                                     | SMR18026 X P1 (JW0451)   |
| SMR18114          | FC36 $\Delta araBAD567 \Delta att\lambda::P_{BADl}-Scel$<br>$\Delta zfa2334.5::FRTcatFRTIScelsite \Delta lrp787::FRTKanFRT$                                           | SMR18026 X P1 (JW0872)   |
| SMR18115          | FC36 $\Delta araBAD567 \Delta att\lambda::P_{BADl}-Scel$<br>$\Delta zfa2334.5::FRTcatFRTIScelsite$<br>$\Delta acrA748::FRTKanFRT$                                     | SMR18026 X P1 (JW0452)   |
| SMR18116          | FC36 $\Delta araBAD567 \Delta att\lambda::P_{BADl}-Scel$<br>$\Delta zfa2334.5::FRTcatFRTIScelsite$<br>$\Delta pstB756::FRTKanFRT$                                     | SMR18026 X P1 (JW3703)   |
| SMR18117          | FC36 $\Delta araBAD567 \Delta att\lambda::P_{BADl}-Scel$<br>$\Delta zfa2334.5::FRTcatFRTIScelsite$<br>$\Delta ruvC789::FRTKanFRT$                                     | SMR18026 X P1 (JW1852)   |
| ZK1268<br>Plasmid | $rpoS::Tn10$                                                                                                                                                          | (133)                    |
| pCP20             | Yeast Flp recombinase on a temperature-sensitive<br>replicon $\lambda.cIts857$                                                                                        | (30)                     |

---

|       |                                                          |      |
|-------|----------------------------------------------------------|------|
| pKD3  | Source of FRT <i>cat</i> FRT                             | (30) |
| pKD4  | Source of FRTKanFRT                                      | (30) |
| pKD46 | <i>ori101 repA101ts P<sub>BAD</sub>-gam-bet-exo AmpR</i> | (30) |

---

**Table S5. Validation of stress-induced mutagenesis defects of SIM network mutants in chromosomal Tet frameshift and Nal<sup>R</sup> base-substitution forward-mutation assays**

Mutant frequencies are Tet<sup>R</sup> cfu / total cfu or Nal<sup>R</sup> cfu / total cfu, with three independent cultures per experiment [Methods, per (2)], and the means are for  $\geq 3$  independent experiments. Fold decrease in mutant frequency is the mutant frequency of the WT-DSB (control) divided by the frequency from the mutant DSB strain assayed in parallel, then averaged for  $\geq 3$  independent experiments. *P* values are for differences from the WT DSB control strain per Methods. Most mutants identified in the Lac assay primary screen were confirmed in Tet (43 of 52 tested) and Nal (41 of 50) assays in which their defects are quantitatively similar (Tables S1, S6). Nine mutants, the names of which are annotated\*, were not confirmed for both assays. All but two of these 9, *yqiC* and *ldcA*, are SDS-EDTA sensitive (Table S7), indicating membrane stress and possible membrane-stress ( $\sigma^E$ )-response defects, suggesting that these proteins promote SIM by promoting the  $\sigma^E$  response, which promotes mutagenesis by promoting spontaneous DNA breaks and is superfluous when DSBs are provided by I-*SceI* ( $\delta$ ), as is the case in the Tet assay (2). Also, *yqiC* encodes a putative membrane protein (Table S2) and *ldcA* encodes L,D-carboxypeptidase that has an essential function in murein (peptidoglycan) recycling (52), and so might also be defective in inducing the  $\sigma^E$ - membrane-protein stress response under the conditions of our SIM assay. Thus, proteins that promote mutation *via* activation of the  $\sigma^E$  response are expected to be superfluous in this assay. Thus, the overwhelming majority of proteins tested are confirmed. Seven mutants of genes previously known to be central to SIM ( $\beta$ ) were used as controls, and also show decrease in stress-induced Nal<sup>R</sup> base-substitution mutation in compared with WT. NT, not tested.

| Mutant Gene       | Strain   | Mean mutant frequency (Tet <sup>R</sup> cfu/10 <sup>8</sup> cfu) $\pm$ SEM | Mean fold decrease in mutant frequency (WT/mutant) $\pm$ SEM | P value              | Strain   | Mean mutant frequency (Nal <sup>R</sup> cfu/10 <sup>8</sup> cfu) $\pm$ SEM | Mean fold decrease in mutant frequency (WT/mutant) $\pm$ SEM | P value |
|-------------------|----------|----------------------------------------------------------------------------|--------------------------------------------------------------|----------------------|----------|----------------------------------------------------------------------------|--------------------------------------------------------------|---------|
| No DSB            | SMR10799 | 0.26 $\pm$ 0.07                                                            | 50 $\pm$ 20                                                  | 1 X 10 <sup>-9</sup> | SMR18025 | 0.22 $\pm$ 0.02                                                            | 16 $\pm$ 3.5                                                 | 0.007   |
| DSB               | SMR10800 | 10 $\pm$ 2                                                                 |                                                              |                      | SMR18026 | 3.6 $\pm$ 0.9                                                              |                                                              |         |
| <b>Regulators</b> |          |                                                                            |                                                              |                      |          |                                                                            |                                                              |         |
| <i>arcA</i>       | SMR17535 | 0.4 $\pm$ 0.1                                                              | 30 $\pm$ 17                                                  | 0.004                | SMR18054 | 0.98 $\pm$ 0.2                                                             | 2.4 $\pm$ 0.6                                                | 0.046   |
| <i>argR</i>       | SMR17214 | 3.4 $\pm$ 0.5                                                              | 3.8 $\pm$ 0.8                                                | 0.053                | SMR18075 | 0.65 $\pm$ 0.2                                                             | 5.1 $\pm$ 1                                                  | 0.033   |
| <i>barA</i>       | SMR17208 | 2.8 $\pm$ 0.8                                                              | 5 $\pm$ 1                                                    | 0.029                | SMR18069 | 0.54 $\pm$ 0.3                                                             | 6.2 $\pm$ 2.9                                                | 0.028   |
| <i>fruR*</i>      | SMR17176 | 17 $\pm$ 3                                                                 | 0.7 $\pm$ 0.1                                                | 0.325                | SMR18111 | 2.5 $\pm$ 0.4                                                              | 1.6 $\pm$ 0.3                                                | 0.307   |
| <i>glnK</i>       | SMR17244 | 2.2 $\pm$ 0.6                                                              | 7 $\pm$ 3                                                    | 0.034                | SMR18071 | 0.7 $\pm$ 0.2                                                              | 3.9 $\pm$ 1.7                                                | 0.034   |
| <i>hdfR</i>       | SMR17242 | 2.5 $\pm$ 0.6                                                              | 6 $\pm$ 2                                                    | 0.037                | SMR18070 | 0.9 $\pm$ 0.5                                                              | 6 $\pm$ 2                                                    | 0.042   |
| <i>ihfA</i>       | SMR17521 | 1 $\pm$ 0.7                                                                | 23 $\pm$ 9                                                   | 0.005                | SMR18056 | 0.6 $\pm$ 0.05                                                             | 5.5 $\pm$ 2.3                                                | 0.032   |
| <i>lrp</i>        | SMR17537 | 6 $\pm$ 3                                                                  | 2.6 $\pm$ 0.8                                                | 0.027                | SMR18042 | 1.1 $\pm$ 0.03                                                             | 2.9 $\pm$ 1                                                  | 0.05    |
| <i>mall</i>       | SMR17234 | 3 $\pm$ 1                                                                  | 6.3 $\pm$ 3.7                                                | 0.05                 | SMR18081 | 0.94 $\pm$ 0.2                                                             | 4.5 $\pm$ 1.7                                                | 0.044   |



|                                 |          |            |             |        |          |             |            |       |
|---------------------------------|----------|------------|-------------|--------|----------|-------------|------------|-------|
| <i>metJ</i>                     | SMR17196 | 5.9 ± 0.9  | 2.4 ± 0.7   | 0.02   | SMR18044 | 0.97 ± 0.04 | 2.2 ± 0.2  | 0.047 |
| <i>phoU</i>                     | SMR17539 | 4.1 ± 0.9  | 2.8 ± 0.7   | 0.029  | NT       |             |            |       |
| <i>ppk*</i>                     | SMR17507 | 14 ± 5     | 0.9 ± 0.4   | 0.342  | SMR18105 | 1.4 ± 0.7   | 2.5 ± 0.8  | 0.127 |
| <i>treR</i>                     | NT       |            |             |        | SMR18055 | 0.9 ± 0.2   | 2.8 ± 1    | 0.043 |
| <b>Proteases and chaperones</b> |          |            |             |        |          |             |            |       |
| <i>cspC</i>                     | SMR17192 | 1.9 ± 0.3  | 5.7 ± 0.6   | 0.017  | SMR18074 | 0.76 ± 0.5  | 7.7 ± 2.3  | 0.04  |
| <i>groES*</i>                   | SMR17509 | 8 ± 1      | 1.2 ± 0.1   | 0.539  | SMR18096 | 1.7 ± 0.6   | 2.6 ± 0.9  | 0.141 |
| <i>hfq</i>                      | SMR17216 | 0.4 ± 0.2  | 45 ± 16     | 0.006  | SMR18066 | 1 ± 0.06    | 3.1 ± 1    | 0.049 |
| <i>IdcA*</i>                    | SMR17228 | 26 ± 0.1   | 0.36 ± 0.07 | 0.0006 | SMR18080 | 1.9 ± 0.3   | 2.6 ± 0.9  | 0.625 |
| <i>lon</i>                      | SMR17212 | 2.6 ± 0.4  | 5 ± 2       | 0.024  | SMR18083 | 0.45 ± 0.1  | 11.2 ± 7.3 | 0.027 |
| <i>prc</i>                      | NT       |            |             |        | SMR18046 | 0.94 ± 0.1  | 3.4 ± 0.9  | 0.045 |
| <b>Electron transfer</b>        |          |            |             |        |          |             |            |       |
| <i>cyoA</i>                     | SMR17601 | 5.5 ± 1    | 2.5 ± 0.8   | 0.017  | SMR18038 | 0.92 ± 0.5  | 4.6 ± 1.2  | 0.045 |
| <i>fre</i>                      | SMR17218 | 1.5 ± 0.1  | 8 ± 2       | 0.01   | SMR18087 | 0.33 ± 0.1  | 10.5 ± 2.3 | 0.024 |
| <i>hemL</i>                     | SMR17256 | 1.9 ± 0.3  | 5 ± 1       | 0.009  | NT       |             |            |       |
| <i>hscB</i>                     | SMR17202 | 2 ± 1      | 7 ± 1       | 0.022  | SMR18061 | 1 ± 0.3     | 2.6 ± 1.1  | 0.049 |
| <i>mdh</i>                      | SMR17238 | 0.2 ± 0.1  | 64 ± 16     | 0.006  | SMR18088 | 0.98 ± 0.5  | 8.1 ± 4    | 0.046 |
| <i>nuoC</i>                     | SMR17246 | 2.1 ± 0.5  | 6 ± 2       | 0.013  | SMR18068 | 0.7 ± 0.1   | 4.8 ± 1.5  | 0.034 |
| <i>nuoL</i>                     | SMR17186 | 4.1 ± 0.5  | 2.7 ± 0.8   | 0.05   | NT       |             |            |       |
| <i>pgi</i>                      | SMR17190 | 6 ± 0.8    | 2.6 ± 0.6   | 0.039  | SMR18040 | 0.9 ± 0.2   | 2.6 ± 0.7  | 0.043 |
| <i>sdhB</i>                     | SMR17552 | 5 ± 1      | 1.8 ± 0.3   | 0.038  | SMR18045 | 0.89 ± 0.2  | 3.9 ± 0.8  | 0.042 |
| <i>ubiE</i>                     | SMR17222 | 0.9 ± 0.2  | 13 ± 6      | 0.005  | SMR18108 | 0.2 ± 0.05  | 22 ± 7     | 0.021 |
| <i>ubiH</i>                     | SMR17198 | 1.1 ± 0.4  | 11 ± 4      | 0.013  | NT       |             |            |       |
| <b>Metabolism</b>               |          |            |             |        |          |             |            |       |
| <i>apaH</i>                     | SMR17194 | 3.9 ± 0.3  | 2.8 ± 0.6   | 0.045  | SMR18089 | 1 ± 0.1     | 2.2 ± 0.6  | 0.048 |
| <i>cysD*</i>                    | SMR17547 | 5 ± 1      | 1.9 ± 0.2   | 0.069  | SMR18098 | 1.8 ± 0.4   | 2.6 ± 1.1  | 0.198 |
| <i>lipB</i>                     | SMR17226 | 3 ± 1      | 4 ± 2       | 0.008  | NT       |             |            |       |
| <i>rbsK</i>                     | SMR17188 | 0.85 ± 0.3 | 9 ± 3       | 0.039  | SMR18078 | 0.85 ± 0.3  | 3.9 ± 0.2  | 0.039 |
| <i>speD</i>                     | SMR17184 | 0.84 ± 0.3 | 12 ± 6      | 0.046  | SMR18076 | 0.84 ± 0.3  | 3.5 ± 0.9  | 0.046 |
| <i>speE</i>                     | SMR17174 | 0.7 ± 0.2  | 12 ± 2      | 0.033  | SMR18065 | 0.7 ± 0.2   | 3.8 ± 1    | 0.033 |
| <b>Cellular processes</b>       |          |            |             |        |          |             |            |       |
| <i>acrA</i>                     | SMR17527 | 2.2 ± 0.6  | 7 ± 3       | 0.002  | SMR18115 | 0.3 ± 0.1   | 13 ± 4.2   | 0.023 |
| <i>acrB</i>                     | SMR17529 | 1 ± 0.2    | 13 ± 3      | 0.001  | SMR18113 | 0.4 ± 0.08  | 11.8 ± 6.6 | 0.025 |
| <i>dsbA</i>                     | NT       |            |             |        | SMR18053 | 1 ± 0.06    | 3.2 ± 1    | 0.049 |
| <i>proL</i>                     | SMR17258 | 2.9 ± 0.8  | 5 ± 1       | 0.044  | SMR18097 | 1.1 ± 0.2   | 4.2 ± 1.2  | 0.05  |

|                         |          |           |           |       |          |             |           |       |  |
|-------------------------|----------|-----------|-----------|-------|----------|-------------|-----------|-------|--|
| <i>pstB</i>             | SMR17541 | 4 ± 1     | 2.4 ± 0.3 | 0.048 | SMR18116 | 1.1 ± 0.01  | 3 ± 1.1   | 0.05  |  |
| <i>pstC</i>             | SMR17543 | 4.1 ± 0.8 | 2.4 ± 0.4 | 0.04  | NT       |             |           |       |  |
| <i>rppH*</i>            | SMR17200 | 14 ± 3    | 0.9 ± 0.1 | 0.749 | SMR18062 | 1.8 ± 0.6   | 2.5 ± 0.8 | 0.176 |  |
| <i>tatC*</i>            | SMR17230 | 20 ± 0.1  | 0.5 ± 0.1 | 0.003 | SMR18084 | 3.3 ± 1.4   | 2.1 ± 1   | 0.879 |  |
| <i>trxB*</i>            | SMR17210 | 7 ± 2     | 1.3 ± 0.3 | 0.332 | SMR18064 | 2.1 ± 0.1   | 1.4 ± 0.4 | 0.18  |  |
| <i>znuA</i>             | SMR17555 | 2.4 ± 0.4 | 4.1 ± 0.8 | 0.012 | NT       |             |           |       |  |
| <i>znuC</i>             | SMR17545 | 2.2 ± 0.5 | 5 ± 1     | 0.011 | SMR18043 | 0.98 ± 0.3  | 4.7 ± 1.8 | 0.046 |  |
| <b>Unknown function</b> |          |           |           |       |          |             |           |       |  |
| <i>ybjT</i>             | NT       |           |           |       | SMR18085 | 1 ± 0.2     | 3.2 ± 0.2 | 0.047 |  |
| <i>yjL</i>              | NT       |           |           |       | SMR18100 | 1 ± 0.3     | 5.2 ± 1.5 | 0.046 |  |
| <i>ygfA</i>             | SMR17240 | 1.6 ± 0.2 | 9 ± 3     | 0.027 | SMR18082 | 1 ± 0.2     | 5.4 ± 2.1 | 0.046 |  |
| <i>yicC</i>             | SMR17220 | 4.4 ± 0.4 | 2.6 ± 0.5 | 0.039 | SMR18067 | 0.8 ± 0.4   | 3.7 ± 1.4 | 0.038 |  |
| <i>yjC</i>              | SMR17206 | 0.5 ± 0.1 | 22 ± 3    | 0.009 | SMR18072 | 0.8 ± 0.3   | 3.4 ± 1.1 | 0.036 |  |
| <i>yjE</i>              | SMR17178 | 4 ± 1     | 4 ± 1     | 0.044 | SMR18077 | 0.45 ± 0.1  | 9.6 ± 5.3 | 0.027 |  |
| <i>yigP</i>             | SMR17250 | 2.8 ± 0.8 | 4 ± 2     | 0.019 | SMR18079 | 0.71 ± 0.1  | 4.5 ± 0.9 | 0.035 |  |
| <i>yggE</i>             | SMR17180 | 1.6 ± 0.5 | 8 ± 2     | 0.016 | SMR18110 | 0.6 ± 0.04  | 5 ± 1.8   | 0.033 |  |
| <i>yqiC*</i>            | SMR17182 | 16 ± 4    | 0.8 ± 0.2 | 0.506 | SMR18073 | 2.3 ± 0.9   | 1.4 ± 0.2 | 0.359 |  |
| <i>yjB</i>              | SMR17254 | 1 ± 0.3   | 16 ± 8    | 0.008 | SMR18093 | 0.6 ± 0.2   | 7.9 ± 3.3 | 0.029 |  |
| <b>Previously Known</b> |          |           |           |       |          |             |           |       |  |
| <i>dinB</i>             |          |           |           |       | SMR18092 | 1 ± 0.3     | 4.4 ± 1.3 | 0.05  |  |
| <i>lexA</i>             |          |           |           |       | SMR18095 | 0.2 ± 0.1   | 20 ± 5    | 0.021 |  |
| <i>recA</i>             |          |           |           |       | SMR18102 | 0.13 ± 0.05 | 35 ± 15   | 0.02  |  |
| <i>recB</i>             |          |           |           |       | SMR18109 | 0.1 ± 0.04  | 32 ± 10   | 0.02  |  |
| <i>rpoS</i>             |          |           |           |       | SMR18103 | 0.9 ± 0.3   | 4.5 ± 1.7 | 0.043 |  |
| <i>ruvC</i>             |          |           |           |       | SMR18117 | 0.04 ± 0.01 | 121 ± 52  | 0.019 |  |
| <i>umuC</i>             |          |           |           |       | SMR18094 | 0.9 ± 0.4   | 5.6 ± 1.3 | 0.041 |  |

**Table S6. Correlations of the magnitudes of SIM-deficiency in four stress-induced mutation assays**

Correlation analysis for the fold difference between the wild-type (WT) control and each SIM-down mutant among the four mutation assays employed (summarized, Table S1), for genes assayed that displayed mutagenesis-down phenotypes in Tet and Nal<sup>R</sup> assays, in addition to their defects in the primary screen (Lac) assays. The four assays compared here are Lac<sup>+</sup> papillation (Pap), quantitative Lac<sup>-</sup> to Lac<sup>+</sup> frameshift reversion (Lac), I-*SceI*-stimulated Tet<sup>S</sup> to Tet<sup>R</sup> frameshift reversion (Tet), and I-*SceI*-stimulated Nal<sup>S</sup> to Nal<sup>R</sup> forward, base-substitution mutagenesis (Nal). Pearson correlation coefficients are given along with their *P* values, which indicate the probability that there is no correlation, and were computed with the *Matlab* computer program (software version 7.13; corrcoef command) by transforming the correlation to a *t*-statistic with *N*-2 degrees of freedom. Note that although the correlations of both Lac assays (Lac and Pap) with Tet are not significant (*P* > 0.05), Tet is significantly correlated with Nal, which is significantly correlated with both Lac and Pap (*P* < 0.05).

| Mutation assays compared | Pearson correlation coefficient ( <i>r</i> ) | <i>P</i> value       | Number of mutant pairs compared ( <i>N</i> ) |
|--------------------------|----------------------------------------------|----------------------|----------------------------------------------|
| Lac vs. Pap              | 0.87                                         | $5 \times 10^{-14}$  | 40                                           |
| Lac vs. Tet              | 0.11                                         | 0.52                 | 40                                           |
| Lac vs. Nal              | 0.34                                         | 0.032                | 40                                           |
| Pap vs. Tet              | 0.04                                         | 0.82                 | 40                                           |
| Pap vs. Nal              | 0.53                                         | $4 \times 10^{-4}$   | 40                                           |
| Tet vs. Nal              | 0.55                                         | $2.6 \times 10^{-4}$ | 40                                           |

**Table S7. Results of screens for mutants defective in activation of  $\sigma^S$ , SOS and  $\sigma^E$  responses**

All 93 SIM mutants, separated here into those with weak (1.5-3-fold), moderate (3.1 to 9-fold) and strong (>9-fold) SIM-deficiency in the quantitative Lac mutation assay (Table S3) were screened for possible defects in activating the  $\sigma^S$ , SOS, and  $\sigma^E$  stress responses. We used catalase defect of colonies to screen for mutants lacking  $\sigma^S$  activity in stationary phase (**Catalase colony assay**, Methods). All of the catalase-defective mutants were confirmed as *bona fide*  $\sigma^S$ -response-defective by their failure to activate the  $\sigma^S$ -dependent *PyiaG* promoter measured using of a *yiaG-yfp* fusion gene, while maintaining proficiency at transcription from a non- $\sigma^S$  promoter, indicating no general transcription defect, and also showing normal growth curves, indicating that delayed entry into stationary phase did not cause reduced  $\sigma^S$  activity (Figs. 4A-C, S4,S5). We used UV-sensitivity (Methods) as an initial screen to identify candidate mutants that might be defective in inducing the SOS response. A subset of these was confirmed as SOS-induction-defective by failure at spontaneous induction of the SOS-dependent  $P_{sulA}$  promoter controlling *gfp* [Methods, (21) Fig. 4K]. We used sensitivity to SDS-EDTA (Methods, Fig. S9) as an initial screen for inability to induce the  $\sigma^E$  response. Out of 44, 33 of the SDS-EDTA-sensitive mutants, were confirmed as  $\sigma^E$ -response-deficient by their significant decrease in activity of the  $\sigma^E$ -dependent *rpoHP3* promoter fused to *lacZ* (per Table S11, Figs. 4J, S9). The remaining 11 showed reductions in *rpoHP3-lacZ* activity that were not statistically significant, and though not demonstrated to be  $\sigma^E$ -response-deficient are not confirmed as  $\sigma^E$ -response-proficient (legend Table S11). Some genes were both  $\sigma^E$ -response-deficient and  $\sigma^S$ -response-deficient, or  $\sigma^S$ -response-deficient and deficient in spontaneous induction of the SOS response, and are listed under more than one phenotype.

| <b>SIM phenotype group</b> | <b>Mutant genes</b>                                                                                                                                                                   | <b>Phenotypes</b>                                                                                                                                                                                                                                                                                                                                                                                                                       |
|----------------------------|---------------------------------------------------------------------------------------------------------------------------------------------------------------------------------------|-----------------------------------------------------------------------------------------------------------------------------------------------------------------------------------------------------------------------------------------------------------------------------------------------------------------------------------------------------------------------------------------------------------------------------------------|
| Weak<br>(30 mutants)       | <i>acrA, acrB, apaG, arcA, argD, barA, cspC, fre, ligA, lrp, mall, pepP, polB, ppk, prc, pstB, srlA, sulA, treR, trxB, ubiX, umuC, uvrY, ybjT, yicC, yjcC, yjfL, yqgE, ytbB, znuC</i> | <b><math>\sigma^S</math>-response-deficient:</b> <i>cspC, fre, ubiX</i><br><br><b>UV sensitive:</b> <i>ligA, pstB, umuC, uvrY, yjcC, yqgE</i><br><br><b>Confirmed spontaneous SOS-induction defective:</b> <i>uvrY</i><br><br><b>SDS-EDTA sensitive:</b> <i>acrA, acrB, arcA, fre, lrp, ppk, pstB, trxB, ubiX, znuC</i><br><br><b>Confirmed <math>\sigma^E</math>-response-deficient:</b> <i>arcA, fre, lrp, pstB, trxB, ubiX, znuC</i> |
| Moderate<br>(34 mutants)   | <i>apaH, argR, crp, cyoA, cyoA, cyoD, cysD, dinB, dsbC, fruR, glnK, hscB, lexA, lipB, mdh, metJ, nuoK, pgi, pgl, phoU,</i>                                                            | <b><math>\sigma^S</math>-response-deficient:</b> <i>apaH, cyoA, cyoD, glnK, hscB, mdh, metJ, nuoK, pgi, sdhB, sdhD, speD, speE, ubiD</i><br><br><b>UV sensitive:</b> <i>hscB, lexA, pgi, pgl, recF</i>                                                                                                                                                                                                                                  |

|                                |                                                                                                                                                                                           |                                                                                                                                                                                                                                                                                                                                                                                                                                                                                                                                                                                                                                                       |
|--------------------------------|-------------------------------------------------------------------------------------------------------------------------------------------------------------------------------------------|-------------------------------------------------------------------------------------------------------------------------------------------------------------------------------------------------------------------------------------------------------------------------------------------------------------------------------------------------------------------------------------------------------------------------------------------------------------------------------------------------------------------------------------------------------------------------------------------------------------------------------------------------------|
|                                | <p><i>proL, pstC, recF, sdhB, sdhD, speD, speE, tatC, ubiD, ygfA, yhhK, yigP, yqiC, znuA</i></p>                                                                                          | <p><b>Confirmed spontaneous SOS-induction defective:</b> <i>lexA, pgi</i></p> <p><b>SDS-EDTA sensitive:</b> <i>apaH, cyoA, cyoD, cysD, fruR, lipB, mdh, nuoK, phoU, pstC, sdhB, sdhD, speE, tatC, ubiD, ygfA, yigP, znuA</i></p> <p><b>Confirmed <math>\sigma^E</math>-response-deficient:</b> <i>apaH, cyoA, cyoD, fruR, lipB, mdh, nuoK, phoU, pstC, sdhB, sdhD, ubiD, ygfA, yigP</i></p>                                                                                                                                                                                                                                                           |
| <p>Strong<br/>(29 mutants)</p> | <p><i>dsbA, hdfR, hemL, groES, hfq, ihfA, ldcA, lon, nagC, nuoC, nuoG, nuoH, nuoJ, nuoL, nusA, rbsK, recA, recB, recC, rpoE, rppH, rpoS, ruvA, ruvB, ruvC, ubiA, ubiE, ubiH, yifE</i></p> | <p><b><math>\sigma^S</math>-response-deficient:</b> <i>hdfR, hemL, hfq, nuoC, nuoG, nuoH, nuoJ, nuoL, rbsK, rpoS, ubiA, ubiE, ubiH, yifE</i></p> <p><b>UV sensitive:</b> <i>hdfR, hemL, hfq, ldcA, lon, nusA, recA, recB, recC, rpoS, ruvA, ruvB, ruvC, ubiA, yifE</i></p> <p><b>Confirmed spontaneous SOS-induction defective:</b> <i>recA, recB, recC</i></p> <p><b>SDS-EDTA sensitive:</b> <i>hemL, groES, hfq, ihfA, lon, nuoC, nuoG, nuoH, nuoJ, nuoL, nusA, rpoE, rppH, ubiA, ubiE, ubiH</i></p> <p><b>Confirmed <math>\sigma^E</math>-response-deficient:</b> <i>hemL, lon, nuoC, nuoG, nuoH, nuoJ, nuoL, rpoE, rppH, ubiA, ubiE, ubiH</i></p> |

**Table S8.  $\sigma^S$  activity of catalase-defective mutants**

$\sigma^S$  activity was assayed as YFP expression from  $\sigma^S$ -dependent promoter  $P_{yiaG}$  (15) from a *yiaG-yfp* fusion measured by flow cytometry (Fig. S4 legend). Relative  $\sigma^S$  activity is YFP mean fluorescence intensity of the tested strain divided by that of the *rpoS* mutant. Means  $\pm$  SEM of  $\geq 3$  experiments, 3 cultures per strain. % decrease in  $\sigma^S$  activity = [Relative  $\sigma^S$  (WT – mutant)/WT]  $\times$  100] averaged from  $\geq 3$  experiments with mutant and control strains tested in parallel. *P* values per Methods. Fold increase in  $\sigma^S$  activity is the relative  $\sigma^S$  activity of the mutants divided by that of the WT control tested in parallel.

| Strain   | Relevant genotype | Relative $\sigma^S$ activity | % decrease in $\sigma^S$ activity relative to WT (mean $\pm$ SEM)                  | <i>P</i> value              |
|----------|-------------------|------------------------------|------------------------------------------------------------------------------------|-----------------------------|
| SMR10582 | WT                | 3.4 $\pm$ 0.3                |                                                                                    |                             |
| SMR12661 | <i>rpoS</i>       | 1 $\pm$ 0                    | 71 $\pm$ 2                                                                         | 0.0007                      |
| SMR12830 | <i>apaH</i>       | 2.29 $\pm$ 0.05              | 38 $\pm$ 3                                                                         | 0.009                       |
| SMR14263 | <i>cspC</i>       | 1.9 $\pm$ 0.1                | 44 $\pm$ 5                                                                         | 0.002                       |
| SMR14283 | <i>cyoA</i>       | 2.1 $\pm$ 0.2                | 38 $\pm$ 5                                                                         | 0.005                       |
| SMR13035 | <i>cyoD</i>       | 2.27 $\pm$ 0.09              | 33 $\pm$ 5                                                                         | 0.002                       |
| SMR14267 | <i>fre</i>        | 2.2 $\pm$ 0.1                | 34 $\pm$ 6                                                                         | 0.007                       |
| SMR14281 | <i>glnK</i>       | 2.53 $\pm$ 0.08              | 26 $\pm$ 5                                                                         | 0.02                        |
| SMR14261 | <i>hdfR</i>       | 1.76 $\pm$ 0.01              | 48 $\pm$ 4                                                                         | 0.0004                      |
| SMR14431 | <i>hemL</i>       | 2.58 $\pm$ 0.02              | 24 $\pm$ 6                                                                         | 0.009                       |
| SMR14295 | <i>hfq</i>        | 1.36 $\pm$ 0.05              | 60 $\pm$ 4                                                                         | 0.0001                      |
| SMR14275 | <i>hscB</i>       | 2.54 $\pm$ 0.04              | 25 $\pm$ 7                                                                         | 0.007                       |
| SMR13058 | <i>mdh</i>        | 2.4 $\pm$ 0.1                | 30 $\pm$ 9                                                                         | 0.003                       |
| SMR14269 | <i>metJ</i>       | 2.1 $\pm$ 0.02               | 40 $\pm$ 5                                                                         | 0.001                       |
| SMR12655 | <i>nuoC</i>       | 2.03 $\pm$ 0.03              | 41 $\pm$ 4                                                                         | 0.002                       |
| SMR14420 | <i>nuoG</i>       | 2.31 $\pm$ 0.03              | 32 $\pm$ 6                                                                         | 0.003                       |
| SMR14287 | <i>nuoH</i>       | 2.26 $\pm$ 0.06              | 33 $\pm$ 6                                                                         | 0.006                       |
| SMR14289 | <i>nuoJ</i>       | 2.21 $\pm$ 0.09              | 35 $\pm$ 6                                                                         | 0.005                       |
| SMR14285 | <i>nuoK</i>       | 2.23 $\pm$ 0.06              | 34 $\pm$ 6                                                                         | 0.002                       |
| SMR14273 | <i>nuoL</i>       | 2.28 $\pm$ 0.07              | 33 $\pm$ 6                                                                         | 0.02                        |
| SMR13295 | <i>pgi</i>        | 2.6 $\pm$ 0.1                | 14 $\pm$ 4                                                                         | 0.002                       |
| SMR13312 | <i>rbsK</i>       | 2.1 $\pm$ 0.2                | 30 $\pm$ 7                                                                         | 0.0023                      |
| SMR14297 | <i>sdhB</i>       | 2.5 $\pm$ 0.1                | 28 $\pm$ 6                                                                         | 0.02                        |
| SMR13033 | <i>sdhD</i>       | 2.63 $\pm$ 0.07              | 22 $\pm$ 7                                                                         | 0.01                        |
| SMR12828 | <i>speD</i>       | 1.8 $\pm$ 0.2                | 39 $\pm$ 6                                                                         | 0.001                       |
| SMR13310 | <i>speE</i>       | 2.1 $\pm$ 0.2                | 30 $\pm$ 7                                                                         | 0.003                       |
| SMR14447 | <i>ubiA</i>       | 2.22 $\pm$ 0.04              | 35 $\pm$ 5                                                                         | 0.002                       |
| SMR13098 | <i>ubiD</i>       | 2.57 $\pm$ 0.03              | 25 $\pm$ 5                                                                         | 0.008                       |
| SMR12657 | <i>ubiE</i>       | 2.1 $\pm$ 0.2                | 37 $\pm$ 6                                                                         | 0.002                       |
| SMR12686 | <i>ubiH</i>       | 2.17 $\pm$ 0.07              | 36 $\pm$ 4                                                                         | 0.004                       |
| SMR12699 | <i>ubiX</i>       | 2.6 $\pm$ 0.1                | 24 $\pm$ 5                                                                         | 0.008                       |
| SMR14259 | <i>yifE</i>       | 1.94 $\pm$ 0.07              | 43 $\pm$ 5                                                                         | 0.002                       |
|          |                   |                              | <b>Fold-increase in <math>\sigma^S</math> activity (mean <math>\pm</math> SEM)</b> | <b><i>P</i> value</b>       |
| SMR10582 | WT                | 3.9 $\pm$ 0.07               |                                                                                    |                             |
| SMR12684 | <i>arcB</i>       | 5.7 $\pm$ 0.5                | 1.5 $\pm$ 0.1                                                                      | 0.003                       |
| SMR12683 | <i>arcA</i>       | 6.0 $\pm$ 0.3                | 1.6 $\pm$ 0.08                                                                     | 5 $\times$ 10 <sup>-5</sup> |
| SMR12692 | <i>rssB</i>       | 10.7 $\pm$ 0.2               | 2.8 $\pm$ 0.1                                                                      | 2 $\times$ 10 <sup>-8</sup> |

**Table S9. Upregulating  $\sigma^S$  via *arcB*, *arcA* or *rssB* mutations partially restores SIM-proficiency to electron transfer mutants**

SIM is restored or partially restored in *cyoD*, *nuoC* or *ubiD* mutant strains by increasing  $\sigma^S$  by introduction of *arcB*, *arcA* or *rssB* mutations. Mutation rates taken from days 3 to 5 per (59). Rates and mean fold increases calculated from 3 experiments with strains tested in parallel, per (57). Fold difference of ratios of mutation rates for double mutants to control are, e.g., the ratios of mutation rates for *cyoD arcB*, *cyoD arcA* or *cyoD rssB* to single mutant *cyoD* divided by the respective controls, i.e., the ratios of *arcB*, *arcA* or *rssB* to WT. Values greater than one indicate specific suppression of the electron-transfer mutant's SIM-down phenotype by *arcB*, *arcA*, or *rssB* mutations that upregulate  $\sigma^S$ , and reflect the fraction of the SIM-down phenotypes of the electron transfer mutants attributable to their failure to activate the  $\sigma^S$  response. Values averaged from three experiments with the strains compared tested in parallel. % of mutagenesis restored was determined by multiplying the ratios of mutation rates for double mutants to single mutant by 100, such as, mutation rates (*cyoD arcB/arcB*)  $\times$  100, and indicate the fraction of the electron-transfer mutant's SIM deficiency that was restored by  $\sigma^S$  upregulation, and thus what fraction of their SIM deficiency relates to their  $\sigma^S$ -activation defects. *P* values for mutation rates from three experiments for strains tested in parallel, per Methods. *P* values for the ratios of mutation rates for double to single mutant (e.g., *cyoD arcB/cyoD*) to the ratios of mutation rates for *arcB*, *arcA* or *rssB* to WT were determined by two-tailed Student's *t* test tested in parallel.

| Strain   | Relevant genotype | Mean mutation rate (Lac <sup>+</sup> cfu/ 10 <sup>8</sup> cells/day) $\pm$ SEM | Mean fold-increase in mutation rate over WT $\pm$ SEM   |                                                                                                  |                                                    | <i>P</i> value (mutation rates)                                       |
|----------|-------------------|--------------------------------------------------------------------------------|---------------------------------------------------------|--------------------------------------------------------------------------------------------------|----------------------------------------------------|-----------------------------------------------------------------------|
| SMR4562  | WT                | 32 $\pm$ 2                                                                     |                                                         |                                                                                                  |                                                    |                                                                       |
| SMR12673 | <i>arcB</i>       | 56 $\pm$ 3                                                                     | 1.8 $\pm$ 0.07                                          |                                                                                                  |                                                    | 0.002                                                                 |
| SMR12672 | <i>arcA</i>       | 24.6 $\pm$ 0.4                                                                 | 0.77 $\pm$ 0.05                                         |                                                                                                  |                                                    | 0.012                                                                 |
| SMR12566 | <i>rssB</i>       | 106 $\pm$ 6                                                                    | 3.3 $\pm$ 0.03                                          |                                                                                                  |                                                    | 0.0003                                                                |
|          |                   |                                                                                | Mutation rate: double mutants / single mutant $\pm$ SEM | Mean fold-difference of ratios of mutation rate for double mutants relative to control $\pm$ SEM | Percent of mutagenesis restored (mean % $\pm$ SEM) | <i>P</i> value (ratios of mutation rates for double : single mutants) |
| SMR4562  | WT                | 32 $\pm$ 2                                                                     |                                                         |                                                                                                  |                                                    |                                                                       |
| SMR12574 | <i>cyoD</i>       | 4.9 $\pm$ 0.9                                                                  |                                                         |                                                                                                  |                                                    |                                                                       |
| SMR13050 | <i>cyoD arcB</i>  | 31 $\pm$ 7                                                                     | 6.3 $\pm$ 0.4                                           | 3.6 $\pm$ 0.4                                                                                    | 56 $\pm$ 15                                        | 0.0004                                                                |
| SMR13048 | <i>cyoD arcA</i>  | 14 $\pm$ 1                                                                     | 2.9 $\pm$ 0.4                                           | 3.8 $\pm$ 0.3                                                                                    | 56 $\pm$ 4                                         | 0.004                                                                 |
| SMR13084 | <i>cyoD rssB</i>  | 42 $\pm$ 9                                                                     | 8.4 $\pm$ 0.5                                           | 2.6 $\pm$ 0.2                                                                                    | 39 $\pm$ 8                                         | 0.007                                                                 |
| SMR4562  | WT                | 31 $\pm$ 2                                                                     |                                                         |                                                                                                  |                                                    |                                                                       |
| SMR12223 | <i>nuoC</i>       | 1.8 $\pm$ 0.1                                                                  |                                                         |                                                                                                  |                                                    |                                                                       |
| SMR12594 | <i>nuoC arcB</i>  | 13.2 $\pm$ 0.05                                                                | 7.3 $\pm$ 0.2                                           | 4.2 $\pm$ 0.1                                                                                    | 24 $\pm$ 1                                         | 0.0005                                                                |
| SMR12590 | <i>nuoC arcA</i>  | 7.6 $\pm$ 0.2                                                                  | 4.2 $\pm$ 0.1                                           | 5.5 $\pm$ 0.3                                                                                    | 31 $\pm$ 1                                         | 0.0006                                                                |
| SMR12562 | <i>nuoC rssB</i>  | 19 $\pm$ 3                                                                     | 10 $\pm$ 1                                              | 3.1 $\pm$ 0.3                                                                                    | 18 $\pm$ 2                                         | 0.004                                                                 |
| SMR4562  | WT                | 30 $\pm$ 3                                                                     |                                                         |                                                                                                  |                                                    |                                                                       |
| SMR12313 | <i>ubiD</i>       | 9 $\pm$ 1                                                                      |                                                         |                                                                                                  |                                                    |                                                                       |

|          |                  |         |           |           |         |       |
|----------|------------------|---------|-----------|-----------|---------|-------|
| SMR12598 | <i>ubiD arcB</i> | 48 ± 4  | 5.4 ± 0.8 | 3.1 ± 0.4 | 86 ± 11 | 0.05  |
| SMR12596 | <i>ubiD arcA</i> | 21 ± 2  | 2.4 ± 0.3 | 3 ± 0.2   | 87 ± 9  | 0.003 |
| MR12613  | <i>ubiD rssB</i> | 55 ± 11 | 5.8 ± 0.5 | 1.8 ± 0.1 | 51 ± 8  | 0.008 |



**Table S10. RpoS acts in the same pathway (is epistatic with) electron transfer mutations in DSB-dependent SIM**

Mutation rates are the change in mutant frequency between days 3 and 5 for 3-5 independent experiments with 3-4 independent cultures per strain per experiment. Enzyme-only strains carry the inducible *I-SceI* gene but no cutsite, and so do not induce DSBs near *lac*. Fold decrease of mutation rate for three independent experiments is the mean mutation rate for the WT-enzyme-only or WT-DSB (control) divided by that of the mutant. *P* values for mutation rates from three experiments for strains tested in parallel, and *P* values for mutation rates for double mutants (e.g., *cyoD rpoS*) to single *rpoS* mutant tested in parallel, were determined by two-tailed Student's *t* test.

| Strain   | Relevant genotype            | Mean mutation rate (Lac <sup>+</sup> cfu per 10 <sup>8</sup> cells per day ± SEM) | Mean fold decrease in mutation rate (± SEM) | <i>P</i> value (mutation rates) | <i>P</i> value (rates for double : single mutants tested in parallel) |
|----------|------------------------------|-----------------------------------------------------------------------------------|---------------------------------------------|---------------------------------|-----------------------------------------------------------------------|
| SMR6276  | enzyme only WT               | 50 ± 8                                                                            |                                             |                                 |                                                                       |
| SMR13487 | enzyme only <i>cyoD</i>      | 5.7 ± 0.8                                                                         | 9.1 ± 1                                     | 0.00002                         |                                                                       |
| SMR13484 | enzyme only <i>nuoC</i>      | 2.5 ± 0.7                                                                         | 21 ± 3                                      | 0.00001                         |                                                                       |
| SMR13661 | enzyme only <i>ubiE</i>      | 2.4 ± 0.4                                                                         | 19 ± 2                                      | 0.001                           |                                                                       |
| SMR13448 | enzyme only <i>rpoS</i>      | 2.9 ± 0.6                                                                         | 18 ± 1                                      | 0.00001                         |                                                                       |
| SMR13491 | enzyme only <i>rpoS cyoD</i> | 2.5 ± 0.6                                                                         | 24 ± 3                                      | 0.0049                          | 0.318                                                                 |
| SMR13489 | enzyme only <i>rpoS nuoC</i> | 2.3 ± 0.3                                                                         | 25 ± 2                                      | 0.0049                          | 0.161                                                                 |
| SMR13659 | enzyme only <i>rpoS ubiE</i> | 1.9 ± 0.3                                                                         | 24 ± 2                                      | 0.001                           | 0.247                                                                 |
| SMR6308  | DSB WT                       | 682 ± 86                                                                          |                                             |                                 |                                                                       |
| SMR11437 | DSB <i>rpoS</i>              | 6.4 ± 2                                                                           | 132 ± 42                                    | 0.0043                          |                                                                       |
| SMR13495 | DSB <i>cyoD</i>              | 91 ± 20                                                                           | 9 ± 2                                       | 0.000006                        |                                                                       |
| SMR13497 | DSB <i>nuoC</i>              | 25 ± 5                                                                            | 31 ± 5                                      | 0.000002                        |                                                                       |
| SMR13669 | DSB <i>ubiE</i>              | 4.4 ± 0.8                                                                         | 210 ± 30                                    | 0.00004                         |                                                                       |
| SMR13633 | DSB <i>rpoS cyoD</i>         | 4.3 ± 0.6                                                                         | 210 ± 16                                    | 0.0003                          | 0.666                                                                 |
| SMR13630 | DSB <i>rpoS nuoC</i>         | 2.9 ± 0.4                                                                         | 200 ± 20                                    | 0.0003                          | 0.794                                                                 |
| SMR13663 | DSB <i>rpoS ubiE</i>         | 3.4 ± 0.2                                                                         | 261 ± 14                                    | 0.00004                         | 0.081                                                                 |
| SMR17297 | DSB <i>fre</i>               | 62 ± 10                                                                           | 9.9 ± 1.1                                   | 0.001                           |                                                                       |
| SMR17291 | DSB <i>hemL</i>              | 20 ± 7.8                                                                          | 35 ± 7.8                                    | 0.0006                          |                                                                       |
| SMR17374 | DSB <i>hscB</i>              | 34 ± 4.7                                                                          | 18.6 ± 4.8                                  | 0.0007                          |                                                                       |
| SMR14455 | DSB <i>mdh</i>               | 5.3 ± 1.4                                                                         | 127 ± 31                                    | 0.0006                          |                                                                       |
| SMR17370 | DSB <i>pgi</i>               | 34 ± 9.7                                                                          | 22 ± 8                                      | 0.0007                          |                                                                       |
| SMR17301 | DSB <i>sdhD</i>              | 39 ± 4.2                                                                          | 16 ± 1.2                                    | 0.00001                         |                                                                       |
| SMR17299 | DSB <i>rpoS fre</i>          | 6.6 ± 1.6                                                                         | 104 ± 9                                     | 0.00001                         | 0.091                                                                 |
| SMR17293 | DSB <i>rpoS hemL</i>         | 4.5 ± 1.8                                                                         | 170 ± 50                                    | 0.0006                          | 0.286                                                                 |
| SMR17376 | DSB <i>rpoS hscB</i>         | 6.1 ± 1.9                                                                         | 129 ± 25                                    | 0.00001                         | 0.201                                                                 |
| SMR14467 | DSB <i>rpoS mdh</i>          | 4.5 ± 0.4                                                                         | 131 ± 2.7                                   | 0.0006                          | 0.449                                                                 |
| SMR17372 | DSB <i>rpoS pgi</i>          | 5.4 ± 1.5                                                                         | 127 ± 30                                    | 0.0006                          | 0.396                                                                 |
| SMR17385 | DSB <i>rpoS sdhD</i>         | 3.7 ± 1                                                                           | 176 ± 36                                    | 0.0006                          | 0.872                                                                 |
| SMR17282 | DSB <i>recA</i>              | 1 ± 0.09                                                                          | 619 ± 56                                    | 0.0005                          |                                                                       |

**Table S11.  $\sigma^E$  activity of SDS-EDTA-sensitive mutants**

The  $\sigma^E$  membrane-protein stress response can be induced either by peptide fragments of membrane proteins in log-phase cells, or by an alternative starvation-induced pathway in stationary-phase cells (134, 135). We reasoned that the starvation induction of the  $\sigma^E$  response is more likely under our stationary-phase-stress experimental conditions, and so to reflect that, we measured  $\sigma^E$  activity in saturated stationary-phase cultures (Methods) measured as expression of the  $\sigma^E$ -response-dependent *rpoHP3-lacZ* fusion gene (20) in cultures grown to saturation.  $\beta$ -galactosidase activity in Miller units of cultures grown to saturation were taken for each strain and divided by that of the WT control strain assayed in parallel to obtain the relative  $\sigma^E$  activity. The table shows those mutants that showed significantly decreased  $\sigma^E$  activity, indicating that these genes encode proteins that promote/allow activating the  $\sigma^E$  response, which is required for SIM (8). Means  $\pm$  SEM of  $\geq 3$  experiments, two cultures per strain. *P* values (per Methods) were calculated based on values normalized to WT tested in parallel for the  $\geq 3$  experiments. % reduction in  $\sigma^E$  activity = [Relative  $\sigma^E$  (WT – mutant)/WT]  $\times$  100] averaged from  $\geq 3$  experiments with the mutant and control strains tested in parallel.

| Strain   | Relevant genotype         | Relative $\sigma^E$ activity (mean $\pm$ SEM) | % reduction in $\sigma^E$ activity relative to WT (mean $\pm$ SEM) | <i>P</i> value      |
|----------|---------------------------|-----------------------------------------------|--------------------------------------------------------------------|---------------------|
| CAG45114 | WT                        | 1 $\pm$ 0                                     |                                                                    |                     |
| SMR15311 | <i>rpoE2072::Tn10dCam</i> | 0.71 $\pm$ 0.002                              | 29.3 $\pm$ 0.2                                                     | 0.00005             |
| SMR15328 | <i>apaH</i>               | 0.71 $\pm$ 0.01                               | 29.2 $\pm$ 1.3                                                     | 0.000001            |
| SMR15360 | <i>arcA</i>               | 0.91 $\pm$ 0.01                               | 9.4 $\pm$ 0.94                                                     | 0.00002             |
| SMR15330 | <i>cyoA</i>               | 0.91 $\pm$ 0.01                               | 9 $\pm$ 1                                                          | 0.0001              |
| SMR15293 | <i>cyoD</i>               | 0.87 $\pm$ 0.02                               | 12.9 $\pm$ 2.1                                                     | 0.0008              |
| SMR15362 | <i>fre</i>                | 0.86 $\pm$ 0.02                               | 13.7 $\pm$ 2                                                       | 0.001               |
| SMR15253 | <i>fruR</i>               | 0.78 $\pm$ 0.02                               | 22.2 $\pm$ 2.3                                                     | 0.00008             |
| SMR15319 | <i>hemL</i>               | 0.75 $\pm$ 0.08                               | 24.8 $\pm$ 7.8                                                     | 0.01                |
| SMR15259 | <i>lipB</i>               | 0.79 $\pm$ 0.05                               | 20.6 $\pm$ 4.8                                                     | 0.004               |
| SMR15273 | <i>lon</i>                | 0.89 $\pm$ 0.01                               | 10.9 $\pm$ 1.3                                                     | 0.0002              |
| SMR15265 | <i>lrp</i>                | 0.86 $\pm$ 0.03                               | 14.2 $\pm$ 3.5                                                     | 0.0003              |
| SMR15356 | <i>mdh</i>                | 0.56 $\pm$ 0.11                               | 43.5 $\pm$ 11                                                      | 0.005               |
| SMR15277 | <i>nuoC</i>               | 0.61 $\pm$ 0.06                               | 38.7 $\pm$ 5.6                                                     | 0.0004              |
| SMR16038 | <i>nuoG</i>               | 0.48 $\pm$ 0.01                               | 51.8 $\pm$ 1.4                                                     | 0.0007              |
| SMR15249 | <i>nuoH</i>               | 0.59 $\pm$ 0.11                               | 41.1 $\pm$ 11.5                                                    | 0.03                |
| SMR15358 | <i>nuoJ</i>               | 0.53 $\pm$ 0.02                               | 47.2 $\pm$ 2.4                                                     | 0.000002            |
| SMR15366 | <i>nuoK</i>               | 0.62 $\pm$ 0.05                               | 38 $\pm$ 4.8                                                       | 0.0002              |
| SMR15354 | <i>nuoL</i>               | 0.53 $\pm$ 0.07                               | 47 $\pm$ 6.8                                                       | 0.0004              |
| SMR15289 | <i>phoU</i>               | 0.85 $\pm$ 0.03                               | 14.9 $\pm$ 3.6                                                     | 0.001               |
| SMR15301 | <i>pstB</i>               | 0.88 $\pm$ 0.02                               | 12.4 $\pm$ 2.7                                                     | 0.001               |
| SMR15287 | <i>pstC</i>               | 0.92 $\pm$ 0.01                               | 7.7 $\pm$ 1.3                                                      | 0.001               |
| SMR15315 | <i>rppH</i>               | 0.84 $\pm$ 0.03                               | 16.2 $\pm$ 2.8                                                     | 0.003               |
| SMR15261 | <i>sdhB</i>               | 0.8 $\pm$ 0.04                                | 20.3 $\pm$ 3.7                                                     | 0.001               |
| SMR15267 | <i>sdhD</i>               | 0.69 $\pm$ 0.02                               | 30.6 $\pm$ 2.1                                                     | 0.00001             |
| SMR15283 | <i>trxB</i>               | 0.91 $\pm$ 0.02                               | 9.1 $\pm$ 1.8                                                      | 0.02                |
| SMR15321 | <i>ubiA</i>               | 0.49 $\pm$ 0.08                               | 50.8 $\pm$ 7.6                                                     | 0.004               |
| SMR15323 | <i>ubiD</i>               | 0.7 $\pm$ 0.09                                | 29.6 $\pm$ 8.7                                                     | 0.004               |
| SMR15257 | <i>ubiE</i>               | 0.38 $\pm$ 0.01                               | 62.2 $\pm$ 0.85                                                    | 2X10 <sup>-10</sup> |
| SMR15295 | <i>ubiH</i>               | 0.38 $\pm$ 0.01                               | 62.4 $\pm$ 0.73                                                    | 1X10 <sup>-10</sup> |

|          |             |             |                                                                                            |                |
|----------|-------------|-------------|--------------------------------------------------------------------------------------------|----------------|
| SMR15317 | <i>ubiX</i> | 0.74 ± 0.07 | 26.2 ± 8.8                                                                                 | 0.02           |
| SMR15326 | <i>ygfA</i> | 0.88 ± 0.02 | 11.7 ± 1.8                                                                                 | 0.0006         |
| SMR15309 | <i>yigP</i> | 0.55 ± 0.05 | 45.4 ± 5.4                                                                                 | 0.0007         |
| SMR15291 | <i>znuC</i> | 0.89 ± 0.02 | 11.2 ± 2                                                                                   | 0.001          |
|          |             |             | <b>Fold-increase in <math>\sigma^E</math><br/>activity relative to<br/>WT (mean ± SEM)</b> | <b>P value</b> |
| CAG45114 | WT          | 1 ± 0       | 1 ± 0                                                                                      |                |
| SMR15364 | <i>arcB</i> | 1.02 ± 0.01 | 1.02 ± 0.01                                                                                | 0.08           |
| SMR15360 | <i>arcA</i> | 0.91 ± 0.01 | 0.91 ± 0.01                                                                                | 0.00002        |
| SMR15271 | <i>rssB</i> | 0.88 ± 0.03 | 0.88 ± 0.03                                                                                | 0.009          |
| SMR15754 | <i>rseA</i> | 2.1 ± 0.11  | 2.1 ± 0.11                                                                                 | 0.0004         |

**Table S12. Transposon insertion position for promoter-insertion mutations**

Transposon insertion sites in promoter region for the SIM-down mutants. Insertion sites are bp upstream of the start codon.

| <b>Mutant gene</b> | <b>Isolate (strain)</b> | <b>Transposon insertion site (bp)</b> |
|--------------------|-------------------------|---------------------------------------|
| <i>arcA</i>        | 1 (SMR11410)            | -248                                  |
|                    | 2 (SMR11957)            | -252                                  |
| <i>cysD</i>        | 1 (SMR11925)            | -79                                   |
|                    | 2 (SMR11958)            | -88                                   |
| <i>groES</i>       | 1 (SMR11934)            | -93                                   |
| <i>ligA</i>        | 1 (SMR11412)            | -27                                   |
| <i>rpoE</i>        | 1 (SMR5236)             | -90                                   |
|                    | 2 (SMR11937)            | -80                                   |
| <i>yjJL</i>        | 1 (SMR11472)            | -73                                   |
| <i>ytjB</i>        | 1 (SMR11476)            | -57                                   |

**Table S13. Reconstruction experiments: speed of colony formation of electron-transfer mutants does not account for their SIM-down phenotypes**

Average days to form colonies shows the means of three independent reconstruction experiments of 3-4 independent cultures each under exact reconstruction of Lac<sup>+</sup> selection conditions (**Reconstruction experiments**, Methods). Day = 24h interval. Percent of viable cells of Lac<sup>+</sup> colonies are the cfu on M9 B1 lactose *versus* M9 B1 glycerol plates, and would indicate any reduction in the number of colonies formed on lactose medium. The results indicate that the electron-transfer mutants are not slow colony formers on lactose medium, so the absence of stress-induced mutants in these strains is not the result of slow growth of mutants, but rather of decreased mutagenesis.

| Strain   | Relevant Genotype            | Average days to form colonies (± range) | % viable cells of Lac <sup>+</sup> colonies (± range) |
|----------|------------------------------|-----------------------------------------|-------------------------------------------------------|
| SMR3856  | Lac <sup>+</sup>             | 2.05 ± 0.03                             | 99 ± 7                                                |
| SMR3858  | Lac <sup>+</sup>             | 2.06 ± 0.02                             | 100 ± 7                                               |
| SMR3859  | Lac <sup>+</sup>             | 2.06 ± 0.04                             | 98 ± 1                                                |
| SMR13301 | <i>nuoC</i> Lac <sup>+</sup> | 2.11 ± 0.01                             | 94 ± 13                                               |
| SMR13302 | <i>nuoC</i> Lac <sup>+</sup> | 2.13 ± 0.04                             | 88 ± 7                                                |
| SMR13303 | <i>nuoC</i> Lac <sup>+</sup> | 2.1 ± 0.02                              | 86 ± 21                                               |
| SMR13274 | <i>cyoD</i> Lac <sup>+</sup> | 2.12 ± 0.04                             | 93 ± 6                                                |
| SMR13275 | <i>cyoD</i> Lac <sup>+</sup> | 2.13 ± 0.06                             | 95 ± 3                                                |
| SMR13276 | <i>cyoD</i> Lac <sup>+</sup> | 2.11 ± 0.07                             | 84 ± 2                                                |
| SMR13283 | <i>ubiD</i> Lac <sup>+</sup> | 2.16 ± 0.01                             | 97 ± 1                                                |
| SMR13284 | <i>ubiD</i> Lac <sup>+</sup> | 2.2 ± 0.3                               | 93 ± 7                                                |
| SMR13285 | <i>ubiD</i> Lac <sup>+</sup> | 2.12 ± 0.02                             | 92 ± 3                                                |
| SMR13292 | <i>sdhD</i> Lac <sup>+</sup> | 2.1 ± 0.03                              | 94 ± 3                                                |
| SMR13293 | <i>sdhD</i> Lac <sup>+</sup> | 2.1 ± 0.1                               | 94 ± 5                                                |
| SMR13294 | <i>sdhD</i> Lac <sup>+</sup> | 2.09 ± 0.03                             | 92 ± 5                                                |
| SMR13289 | <i>mdh</i> Lac <sup>+</sup>  | 2.44 ± 0.03                             | 86 ± 0.4                                              |
| SMR13290 | <i>mdh</i> Lac <sup>+</sup>  | 2.38 ± 0.04                             | 87 ± 2                                                |
| SMR13291 | <i>mdh</i> Lac <sup>+</sup>  | 2.34 ± 0.02                             | 80 ± 3                                                |
| SMR13280 | <i>ubiE</i> Lac <sup>+</sup> | 2.66 ± 0.03                             | 89 ± 6                                                |
| SMR13281 | <i>ubiE</i> Lac <sup>+</sup> | 2.6 ± 0.1                               | 83 ± 17                                               |
| SMR13282 | <i>ubiE</i> Lac <sup>+</sup> | 2.4 ± 0.2                               | 88 ± 15                                               |

## References

1. R. G. Ponder, N. C. Fonville, S. M. Rosenberg, A switch from high-fidelity to error-prone DNA double-strand break repair underlies stress-induced mutation. *Mol. Cell* **19**, 791 (2005).
2. C. Shee, J. L. Gibson, M. C. Darrow, C. Gonzalez, S. M. Rosenberg, Impact of a stress-inducible switch to mutagenic repair of DNA breaks on mutation in *Escherichia coli*. *Proc. Natl. Acad. Sci. U.S.A.* **108**, 13659 (2011).
3. R. S. Galhardo, P. J. Hastings, S. M. Rosenberg, Mutation as a stress response and the regulation of evolvability. *Crit. Rev. Biochem. Mol. Biol.* **42**, 399 (2007).
4. D. Mittelman, J. H. Wilson, Stress, genomes, and evolution. *Cell Stress Chaperones* **15**, 463 (2010).
5. R. S. Bindra, M. E. Crosby, P. M. Glazer, Regulation of DNA repair in hypoxic cancer cells. *Cancer Metastasis Rev.* **26**, 249 (2007).
6. R. T. Cirz *et al.*, Inhibition of mutation and combating the evolution of antibiotic resistance. *PLoS Biol.* **3**, e176 (2005).
7. S. M. Rosenberg, C. Shee, R. L. Frisch, P. J. Hastings, Stress-induced mutation via DNA breaks in *Escherichia coli*: A molecular mechanism with implications for evolution and medicine. *Bioessays* **34**, 885 (2012).
8. J. L. Gibson *et al.*, The sigma(E) stress response is required for stress-induced mutation and amplification in *Escherichia coli*. *Mol. Microbiol.* **77**, 415 (2010).
9. N. Kleckner, J. Bender, S. Gottesman, Uses of transposons with emphasis on Tn10. *Methods Enzymol.* **204**, 139 (1991).
10. J. R. Roth, E. Kugelberg, A. B. Reams, E. Kofoed, D. I. Andersson, Origin of mutations under selection: The adaptive mutation controversy. *Annu. Rev. Microbiol.* **60**, 477 (2006).
11. P. E. Rouvière *et al.*, *rpoE*, the gene encoding the second heat-shock sigma factor, sigma E, in *Escherichia coli*. *EMBO J.* **14**, 1032 (1995).
12. D. Szklarczyk *et al.*, The STRING database in 2011: Functional interaction networks of proteins, globally integrated and scored. *Nucleic Acids Res.* **39**, (Database issue), D561 (2011).
13. J. J. Faith *et al.*, Many Microbe Microarrays Database: Uniformly normalized Affymetrix compendia with structured experimental metadata. *Nucleic Acids Res.* **36**, (Database issue), D866 (2008).
14. R. B. Gennis, V. Stewart, in *Escherichia coli and Salmonella: Cellular and Molecular Biology*, F. C. Neidhardt *et al.*, Eds. (ASM Press, Washington, DC, 1996), vol. 1, pp. 217–261.
15. S. Lacour, P. Landini, SigmaS-dependent gene expression at the onset of stationary phase in *Escherichia coli*: Function of sigmaS-dependent genes and identification of their promoter sequences. *J. Bacteriol.* **186**, 7186 (2004).

16. M. B. Elowitz, A. J. Levine, E. D. Siggia, P. S. Swain, Stochastic gene expression in a single cell. *Science* **297**, 1183 (2002).
17. T. Friedrich, The NADH:ubiquinone oxidoreductase (complex I) from *Escherichia coli*. *Biochim. Biophys. Acta* **1364**, 134 (1998).
18. R. Meganathan, Ubiquinone biosynthesis in microorganisms. *FEMS Microbiol. Lett.* **203**, 131 (2001).
19. A. Battesti, N. Majdalani, S. Gottesman, The RpoS-mediated general stress response in *Escherichia coli*. *Annu. Rev. Microbiol.* **65**, 189 (2011).
20. S. E. Ades, I. L. Grigorova, C. A. Gross, Regulation of the alternative sigma factor sigma(E) during initiation, adaptation, and shutoff of the extracytoplasmic heat shock response in *Escherichia coli*. *J. Bacteriol.* **185**, 2512 (2003).
21. J. M. Pennington, S. M. Rosenberg, Spontaneous DNA breakage in single living *Escherichia coli* cells. *Nat. Genet.* **39**, 797 (2007).
22. A. I. Prieto, F. Ramos-Morales, J. Casadesús, Repair of DNA damage induced by bile salts in *Salmonella enterica*. *Genetics* **174**, 575 (2006).
23. S. B. Hernández, I. Cota, A. Ducret, L. Aussel, J. Casadesús, Adaptation and preadaptation of *Salmonella enterica* to bile. *PLoS Genet.* **8**, e1002459 (2012).
24. J. N. Strathern, B. K. Shafer, C. B. McGill, DNA synthesis errors associated with double-strand-break repair. *Genetics* **140**, 965 (1995).
25. C. Shee, J. L. Gibson, S. M. Rosenberg, Two mechanisms produce mutation hotspots at DNA breaks in *Escherichia coli*. *Cell Rep.* **2**, 714 (2012).
26. S. Nik-Zainal *et al.*, Mutational processes molding the genomes of 21 breast cancers. *Cell* **149**, 979 (2012).
27. S. A. Roberts *et al.*, Clustered mutations in yeast and in human cancers can arise from damaged long single-strand DNA regions. *Mol. Cell* **46**, 424 (2012).
28. M. S. Cline *et al.*, Integration of biological networks and gene expression data using Cytoscape. *Nat. Protoc.* **2**, 2366 (2007).
29. J. H. Miller, *A Short Course in Bacterial Genetics* (Cold Spring Harbor Laboratory Press, Cold Spring Harbor, NY, 1992).
30. K. A. Datsenko, B. L. Wanner, One-step inactivation of chromosomal genes in *Escherichia coli* K-12 using PCR products. *Proc. Natl. Acad. Sci. U.S.A.* **97**, 6640 (2000).
31. J. Torkelson *et al.*, Genome-wide hypermutation in a subpopulation of stationary-phase cells underlies recombination-dependent adaptive mutation. *EMBO J.* **16**, 3303 (1997).
32. J. Cairns, P. L. Foster, Adaptive reversion of a frameshift mutation in *Escherichia coli*. *Genetics* **128**, 695 (1991).
33. T. Baba *et al.*, Construction of *Escherichia coli* K-12 in-frame, single-gene knockout mutants: The Keio collection. *Mol. Syst. Biol.* **2**, 2006, 0008 (2006).

34. R. S. Harris, K. J. Ross, S. M. Rosenberg, Opposing roles of the holliday junction processing systems of *Escherichia coli* in recombination-dependent adaptive mutation. *Genetics* **142**, 681 (1996).
35. R. L. Frisch *et al.*, Separate DNA Pol II- and Pol IV-dependent pathways of stress-induced mutation during double-strand-break repair in *Escherichia coli* are controlled by RpoS. *J. Bacteriol.* **192**, 4694 (2010).
36. P. L. Foster, J. M. Trimarchi, Adaptive reversion of a frameshift mutation in *Escherichia coli* by simple base deletions in homopolymeric runs. *Science* **265**, 407 (1994).
37. S. M. Rosenberg, S. Longerich, P. Gee, R. S. Harris, Adaptive mutation by deletions in small mononucleotide repeats. *Science* **265**, 405 (1994).
38. P. J. Hastings, H. J. Bull, J. R. Klump, S. M. Rosenberg, Adaptive amplification: An inducible chromosomal instability mechanism. *Cell* **103**, 723 (2000).
39. S. C. Powell, R. M. Wartell, Different characteristics distinguish early versus late arising adaptive mutations in *Escherichia coli* FC40. *Mutat. Res.* **473**, 219 (2001).
40. S. M. Rosenberg, Evolving responsively: Adaptive mutation. *Nat. Rev. Genet.* **2**, 504 (2001).
41. S. M. Rosenberg, C. Thulin, R. S. Harris, Transient and heritable mutators in adaptive evolution in the lab and in nature. *Genetics* **148**, 1559 (1998).
42. T. Akerlund, K. Nordström, R. Bernander, Analysis of cell size and DNA content in exponentially growing and stationary-phase batch cultures of *Escherichia coli*. *J. Bacteriol.* **177**, 6791 (1995).
43. Y. Sáenz, M. Zarazaga, L. Briñas, F. Ruiz-Larrea, C. Torres, Mutations in *gyrA* and *parC* genes in nalidixic acid-resistant *Escherichia coli* strains from food products, humans and animals. *J. Antimicrob. Chemother.* **51**, 1001 (2003).
44. S. R. Vijayakumar, M. G. Kirchhof, C. L. Patten, H. E. Schellhorn, RpoS-regulated genes of *Escherichia coli* identified by random *lacZ* fusion mutagenesis. *J. Bacteriol.* **186**, 8499 (2004).
45. P. C. Loewen, Isolation of catalase-deficient *Escherichia coli* mutants and genetic mapping of *katE*, a locus that affects catalase activity. *J. Bacteriol.* **157**, 622 (1984).
46. A. Costanzo, S. E. Ades, Growth phase-dependent regulation of the extracytoplasmic stress factor, sigmaE, by guanosine 3',5'-bispyrophosphate (ppGpp). *J. Bacteriol.* **188**, 4627 (2006).
47. R. Hengge, The two-component network and the general stress sigma factor RpoS (sigma S) in *Escherichia coli*. *Adv. Exp. Med. Biol.* **631**, 40 (2008).
48. O. Fayet, T. Ziegelhoffer, C. Georgopoulos, The *groES* and *groEL* heat shock gene products of *Escherichia coli* are essential for bacterial growth at all temperatures. *J. Bacteriol.* **171**, 1379 (1989).



49. J. J. Dermody, G. T. Robinson, R. Sternglanz, Conditional-lethal deoxyribonucleic acid ligase mutant of *Escherichia coli*. *J. Bacteriol.* **139**, 701 (1979).
50. G. Becker, E. Klauck, R. Hengge-Aronis, Regulation of RpoS proteolysis in *Escherichia coli*: The response regulator RssB is a recognition factor that interacts with the turnover element in RpoS. *Proc. Natl. Acad. Sci. U.S.A.* **96**, 6439 (1999).
51. Y. Zhou, S. Gottesman, J. R. Hoskins, M. R. Maurizi, S. Wickner, The RssB response regulator directly targets sigma(S) for degradation by ClpXP. *Genes Dev.* **15**, 627 (2001).
52. M. F. Templin, A. Ursinus, J. V. Höltje, A defect in cell wall recycling triggers autolysis during the stationary growth phase of *Escherichia coli*. *EMBO J.* **18**, 4108 (1999).
53. J. D. Stumpf, P. L. Foster, Polyphosphate kinase regulates error-prone replication by DNA polymerase IV in *Escherichia coli*. *Mol. Microbiol.* **57**, 751 (2005).
54. J. C. Layton, P. L. Foster, Error-prone DNA polymerase IV is regulated by the heat shock chaperone GroE in *Escherichia coli*. *J. Bacteriol.* **187**, 449 (2005).
55. S. E. Cohen, G. C. Walker, The transcription elongation factor NusA is required for stress-induced mutagenesis in *Escherichia coli*. *Curr. Biol.* **20**, 80 (2010).
56. G. J. McKenzie, R. S. Harris, P. L. Lee, S. M. Rosenberg, The SOS response regulates adaptive mutation. *Proc. Natl. Acad. Sci. U.S.A.* **97**, 6646 (2000).
57. A. S. He, P. R. Rohatgi, M. N. Hersh, S. M. Rosenberg, Roles of *E. coli* double-strand-break-repair proteins in stress-induced mutation. *DNA Repair (Amst.)* **5**, 258 (2006).
58. P. L. Foster, J. M. Trimarchi, R. A. Maurer, Two enzymes, both of which process recombination intermediates, have opposite effects on adaptive mutation in *Escherichia coli*. *Genetics* **142**, 25 (1996).
59. M. J. Lombardo, I. Aponyi, S. M. Rosenberg, General stress response regulator RpoS in adaptive mutation and amplification in *Escherichia coli*. *Genetics* **166**, 669 (2004).
60. G. J. McKenzie, P. L. Lee, M. J. Lombardo, P. J. Hastings, S. M. Rosenberg, SOS mutator DNA polymerase IV functions in adaptive mutation and not adaptive amplification. *Mol. Cell* **7**, 571 (2001).
61. Y. Nakamura, S. Mizusawa, D. L. Court, A. Tsugawa, Regulatory defects of a conditionally lethal *nusA* mutant of *Escherichia coli*. Positive and negative modulator roles of NusA protein in vivo. *J. Mol. Biol.* **189**, 103 (1986).
62. R. Robledo, M. E. Gottesman, R. A. Weisberg, Lambda *nutR* mutations convert HK022 Nun protein from a transcription termination factor to a suppressor of termination. *J. Mol. Biol.* **212**, 635 (1990).
63. J. F. Petrosino, R. S. Galhardo, L. D. Morales, S. M. Rosenberg, Stress-induced beta-lactam antibiotic resistance mutation and sequences of stationary-phase mutations in the *Escherichia coli* chromosome. *J. Bacteriol.* **191**, 5881 (2009).

64. S. Iuchi, E. C. Lin, *arcA* (dye), a global regulatory gene in *Escherichia coli* mediating repression of enzymes in aerobic pathways. *Proc. Natl. Acad. Sci. U.S.A.* **85**, 1888 (1988).
65. Y. Jeon, Y. S. Lee, J. S. Han, J. B. Kim, D. S. Hwang, Multimerization of phosphorylated and non-phosphorylated ArcA is necessary for the response regulator function of the Arc two-component signal transduction system. *J. Biol. Chem.* **276**, 40873 (2001).
66. M. Caldara, D. Charlier, R. Cunin, The arginine regulon of *Escherichia coli*: Whole-system transcriptome analysis discovers new genes and provides an integrated view of arginine regulation. *Microbiology* **152**, 3343 (2006).
67. A. K. Kiupakis, L. Reitzer, ArgR-independent induction and ArgR-dependent superinduction of the *astCADBE* operon in *Escherichia coli*. *J. Bacteriol.* **184**, 2940 (2002).
68. K. Ishige, S. Nagasawa, S. Tokishita, T. Mizuno, A novel device of bacterial signal transducers. *EMBO J.* **13**, 5195 (1994).
69. A. Kolb, S. Busby, H. Buc, S. Garges, S. Adhya, Transcriptional regulation by cAMP and its receptor protein. *Annu. Rev. Biochem.* **62**, 749 (1993).
70. D. Zheng, C. Constantinidou, J. L. Hobman, S. D. Minchin, Identification of the CRP regulon using in vitro and in vivo transcriptional profiling. *Nucleic Acids Res.* **32**, 5874 (2004).
71. T. Shimada, K. Yamamoto, A. Ishihama, Novel members of the Cra regulon involved in carbon metabolism in *Escherichia coli*. *J. Bacteriol.* **193**, 649 (2011).
72. M. R. Atkinson, A. J. Ninfa, Role of the GlnK signal transduction protein in the regulation of nitrogen assimilation in *Escherichia coli*. *Mol. Microbiol.* **29**, 431 (1998).
73. E. Krin, A. Danchin, O. Soutourina, Decrypting the H-NS-dependent regulatory cascade of acid stress resistance in *Escherichia coli*. *BMC Microbiol.* **10**, 273 (2010).
74. M. Ko, C. Park, H-NS-Dependent regulation of flagellar synthesis is mediated by a LysR family protein. *J. Bacteriol.* **182**, 4670 (2000).
75. M. Freundlich, N. Ramani, E. Mathew, A. Sirko, P. Tsui, The role of integration host factor in gene expression in *Escherichia coli*. *Mol. Microbiol.* **6**, 2557 (1992).
76. T. H. Tani, A. Khodursky, R. M. Blumenthal, P. O. Brown, R. G. Matthews, Adaptation to famine: A family of stationary-phase genes revealed by microarray analysis. *Proc. Natl. Acad. Sci. U.S.A.* **99**, 13471 (2002).
77. J. Reidl, K. Römisch, M. Ehrmann, W. Boos, Mall, a novel protein involved in regulation of the maltose system of *Escherichia coli*, is highly homologous to the repressor proteins GalR, CytR, and LacI. *J. Bacteriol.* **171**, 4888 (1989).

78. I. Saint-Girons, N. Duchange, G. N. Cohen, M. M. Zakin, Structure and autoregulation of the *metJ* regulatory gene in *Escherichia coli*. *J. Biol. Chem.* **259**, 14282 (1984).
79. C. Pennetier, L. Domínguez-Ramírez, J. Plumbridge, Different regions of Mlc and NagC, homologous transcriptional repressors controlling expression of the glucose and N-acetylglucosamine phosphotransferase systems in *Escherichia coli*, are required for inducer signal recognition. *Mol. Microbiol.* **67**, 364 (2008).
80. B. L. Wanner, in *Escherichia coli and Salmonella: Cellular and Molecular Biology*, F. C. Neidhardt *et al.*, Eds. (ASM Press, Washington, DC, 1996), vol. 1, pp. 1357–1381.
81. J. C. Layton, P. L. Foster, Error-prone DNA polymerase IV is controlled by the stress-response sigma factor, RpoS, in *Escherichia coli*. *Mol. Microbiol.* **50**, 549 (2003).
82. K. Decker, F. Gerhardt, W. Boos, The role of the trehalose system in regulating the maltose regulon of *Escherichia coli*. *Mol. Microbiol.* **32**, 777 (1999).
83. A. K. Pernestig, O. Melefors, D. Georgellis, Identification of UvrY as the cognate response regulator for the BarA sensor kinase in *Escherichia coli*. *J. Biol. Chem.* **276**, 225 (2001).
84. S. Phadtare, M. Inouye, Sequence-selective interactions with RNA by CspB, CspC and CspE, members of the CspA family of *Escherichia coli*. *Mol. Microbiol.* **33**, 1004 (1999).
85. R. G. Brennan, T. M. Link, Hfq structure, function and ligand binding. *Curr. Opin. Microbiol.* **10**, 125 (2007).
86. M. F. Charette, G. W. Henderson, A. Markovitz, ATP hydrolysis-dependent protease activity of the *lon* (capR) protein of *Escherichia coli* K-12. *Proc. Natl. Acad. Sci. U.S.A.* **78**, 4728 (1981).
87. T. Yoshimoto, N. Murayama, T. Honda, H. Tone, D. Tsuru, Cloning and expression of aminopeptidase P gene from *Escherichia coli* HB101 and characterization of expressed enzyme. *J. Biochem.* **104**, 93 (1988).
88. J. H. Park, Y. S. Lee, C. H. Chung, A. L. Goldberg, Purification and characterization of protease Re, a cytoplasmic endoprotease in *Escherichia coli*. *J. Bacteriol.* **170**, 921 (1988).
89. B. M. Olivera, I. R. Lehman, Linkage of polynucleotides through phosphodiester bonds by an enzyme from *Escherichia coli*. *Proc. Natl. Acad. Sci. U.S.A.* **57**, 1426 (1967).
90. R. S. Harris, S. Longerich, S. M. Rosenberg, Recombination in adaptive mutation. *Science* **264**, 258 (1994).
91. Y. Anraku, Bacterial electron transport chains. *Annu. Rev. Biochem.* **57**, 101 (1988).

92. K. Saiki, H. Nakamura, T. Mogi, Y. Anraku, Probing a role of subunit IV of the *Escherichia coli* bo-type ubiquinol oxidase by deletion and cross-linking analyses. *J. Biol. Chem.* **271**, 15336 (1996).
93. M. Fontecave, R. Eliasson, P. Reichard, NAD(P)H:flavin oxidoreductase of *Escherichia coli*. A ferric iron reductase participating in the generation of the free radical of ribonucleotide reductase. *J. Biol. Chem.* **262**, 12325 (1987).
94. L. L. Ilag, D. Jahn, G. Eggertsson, D. Söll, The *Escherichia coli hemL* gene encodes glutamate 1-semialdehyde aminotransferase. *J. Bacteriol.* **173**, 3408 (1991).
95. L. E. Vickery, J. J. Silberg, D. T. Ta, Hsc66 and Hsc20, a new heat shock cognate molecular chaperone system from *Escherichia coli*. *Protein Sci.* **6**, 1047 (1997).
96. U. Tokumoto, Y. Takahashi, Genetic analysis of the *isc* operon in *Escherichia coli* involved in the biogenesis of cellular iron-sulfur proteins. *J. Biochem.* **130**, 63 (2001).
97. P. Sutherland, L. McAlister-Henn, Isolation and expression of the *Escherichia coli* gene encoding malate dehydrogenase. *J. Bacteriol.* **163**, 1074 (1985).
98. B. Amarneh, S. B. Vik, Direct transfer of NADH from malate dehydrogenase to complex I in *Escherichia coli*. *Cell Biochem. Biophys.* **42**, 251 (2005).
99. H. Leif, V. D. Sled, T. Ohnishi, H. Weiss, T. Friedrich, Isolation and characterization of the proton-translocating NADH:ubiquinone oxidoreductase from *Escherichia coli*. *Eur. J. Biochem.* **230**, 538 (1995).
100. D. G. Fraenkel, Genetic mapping of mutations affecting phosphoglucose isomerase and fructose diphosphatase in *Escherichia coli*. *J. Bacteriol.* **93**, 1582 (1967).
101. K. Kita, C. R. Vibat, S. Meinhardt, J. R. Guest, R. B. Gennis, One-step purification from *Escherichia coli* of complex II (succinate:ubiquinone oxidoreductase) associated with succinate-reducible cytochrome b556. *J. Biol. Chem.* **264**, 2672 (1989).
102. M. Gulmezian, K. R. Hyman, B. N. Marbois, C. F. Clarke, G. T. Javor, The role of UbiX in *Escherichia coli* coenzyme Q biosynthesis. *Arch. Biochem. Biophys.* **467**, 144 (2007).
103. Y. Mechulam *et al.*, Molecular cloning of the *Escherichia coli* gene for diadenosine 5',5'''-P<sub>1</sub>,P<sub>4</sub>-tetraphosphate pyrophosphohydrolase. *J. Bacteriol.* **164**, 63 (1985).
104. T. S. Leyh, T. F. Vogt, Y. Suo, The DNA sequence of the sulfate activation locus from *Escherichia coli* K-12. *J. Biol. Chem.* **267**, 10405 (1992).
105. N. Glansdorf, in *Escherichia coli and Salmonella: Cellular and Molecular Biology*, F. C. Neidhardt *et al.*, Eds. (ASM Press, Washington, DC, ed. 2, 1996), vol. 1, pp. 321–344.
106. T. J. Vanden Boom, K. E. Reed, J. E. Cronan Jr., Lipoic acid metabolism in *Escherichia coli*: Isolation of null mutants defective in lipoic acid biosynthesis, molecular cloning and characterization of the *E. coli lip* locus, and identification

- of the lipoylated protein of the glycine cleavage system. *J. Bacteriol.* **173**, 6411 (1991).
107. S. W. Jordan, J. E. Cronan Jr., The *Escherichia coli lipB* gene encodes lipoyl (octanoyl)-acyl carrier protein:protein transferase. *J. Bacteriol.* **185**, 1582 (2003).
  108. L. C. Thomason, D. L. Court, A. R. Datta, R. Khanna, J. L. Rosner, Identification of the *Escherichia coli* K-12 *ybhE* gene as *pgl*, encoding 6-phosphogluconolactonase. *J. Bacteriol.* **186**, 8248 (2004).
  109. J. N. Hope, A. W. Bell, M. A. Hermodson, J. M. Groarke, Ribokinase from *Escherichia coli* K12. Nucleotide sequence and overexpression of the *rbsK* gene and purification of ribokinase. *J. Biol. Chem.* **261**, 7663 (1986).
  110. Q. W. Xie, C. W. Tabor, H. Tabor, Spermidine biosynthesis in *Escherichia coli*: Promoter and termination regions of the *speED* operon. *J. Bacteriol.* **171**, 4457 (1989).
  111. D. Ma *et al.*, Genes *acrA* and *acrB* encode a stress-induced efflux system of *Escherichia coli*. *Mol. Microbiol.* **16**, 45 (1995).
  112. J. C. Bardwell, K. McGovern, J. Beckwith, Identification of a protein required for disulfide bond formation in vivo. *Cell* **67**, 581 (1991).
  113. A. Rietsch, D. Belin, N. Martin, J. Beckwith, An *in vivo* pathway for disulfide bond isomerization in *Escherichia coli*. *Proc. Natl. Acad. Sci. U.S.A.* **93**, 13048 (1996).
  114. T. Hasegawa, T. Yokogawa, *Escherichia coli* proline tRNA: Structure and recognition sites for prolyl-tRNA synthetase. *Nucleic Acids Symp. Ser.* **44**, 7 (2000).
  115. A. Torriani, From cell membrane to nucleotides: The phosphate regulon in *Escherichia coli*. *Bioessays* **12**, 371 (1990).
  116. A. Deana, H. Celesnik, J. G. Belasco, The bacterial enzyme RppH triggers messenger RNA degradation by 5' pyrophosphate removal. *Nature* **451**, 355 (2008).
  117. P. W. Postma, J. W. Lengeler, G. R. Jacobson, Phosphoenolpyruvate:carbohydrate phosphotransferase systems of bacteria. *Microbiol. Rev.* **57**, 543 (1993).
  118. P. A. Lee, D. Tullman-Ereck, G. Georgiou, The bacterial twin-arginine translocation pathway. *Annu. Rev. Microbiol.* **60**, 373 (2006).
  119. B. L. Haller, J. A. Fuchs, Mapping of *trxB*, a mutation responsible for reduced thioredoxin reductase activity. *J. Bacteriol.* **159**, 1060 (1984).
  120. S. I. Patzer, K. Hantke, The ZnuABC high-affinity zinc uptake system and its regulator Zur in *Escherichia coli*. *Mol. Microbiol.* **28**, 1199 (1998).
  121. S. Blanchin-Roland, S. Blanquet, J. M. Schmitter, G. Fayat, The gene for *Escherichia coli* diadenosine tetraphosphatase is located immediately clockwise to *folA* and forms an operon with *ksgA*. *Mol. Gen. Genet.* **205**, 515 (1986).
  122. M. Riley *et al.*, *Escherichia coli* K-12: A cooperatively developed annotation snapshot—2005. *Nucleic Acids Res.* **34**, 1 (2006).

123. M. D. Adams *et al.*, Nucleotide sequence and genetic characterization reveal six essential genes for the LIV-I and LS transport systems of *Escherichia coli*. *J. Biol. Chem.* **265**, 11436 (1990).
124. M. C. Carrica *et al.*, YqiC of *Salmonella enterica* serovar Typhimurium is a membrane fusogenic protein required for mice colonization. *BMC Microbiol.* **11**, 95 (2011).
125. A. F. Neuwald, G. V. Stauffer, An *Escherichia coli* membrane protein with a unique signal sequence. *Gene* **82**, 219 (1989).
126. F. R. Blattner *et al.*, The complete genome sequence of *Escherichia coli* K-12. *Science* **277**, 1453 (1997).
127. M. R. Volkert, L. I. Hajec, Z. Matijasevic, F. C. Fang, R. Prince, Induction of the *Escherichia coli* *aidB* gene under oxygen-limiting conditions requires a functional *rpoS* (*katF*) gene. *J. Bacteriol.* **176**, 7638 (1994).
128. G. J. McKenzie, M. J. Lombardo, S. M. Rosenberg, Recombination-dependent mutation in *Escherichia coli* occurs in stationary phase. *Genetics* **149**, 1163 (1998).
129. G. J. McKenzie, D. B. Magner, P. L. Lee, S. M. Rosenberg, The *dinB* operon and spontaneous mutation in *Escherichia coli*. *J. Bacteriol.* **185**, 3972 (2003).
130. P. J. Hastings, A. Slack, J. F. Petrosino, S. M. Rosenberg, Adaptive amplification and point mutation are independent mechanisms: Evidence for various stress-inducible mutation mechanisms. *PLoS Biol.* **2**, e399 (2004).
131. R. G. Ponder, Error-prone DNA double strand break repair in stress-induced mutation. Ph.D. thesis, Baylor College of Medicine (2006).
132. J. M. Pennington, On spontaneous DNA damage in single living cells. Ph.D. thesis, Baylor College of Medicine, Houston, TX (2006).
133. P. C. Loewen, B. L. Triggs, Genetic mapping of *katF*, a locus that with *katE* affects the synthesis of a second catalase species in *Escherichia coli*. *J. Bacteriol.* **160**, 668 (1984).
134. S. E. Ades, Control of the alternative sigma factor sigmaE in *Escherichia coli*. *Curr. Opin. Microbiol.* **7**, 157 (2004).
135. S. E. Ades, Regulation by destruction: Design of the sigmaE envelope stress response. *Curr. Opin. Microbiol.* **11**, 535 (2008).
